# Supplementary material for: Menstrual health and period poverty among young people who menstruate in the Barcelona metropolitan area (Spain): protocol of a mixed-methods study
Source: PubMed Central journal article supplement — BMJ Open. 2020 Jul 29;10(7):e035914. doi: 10.1136/bmjopen-2019-035914 (PMC7394147; doi:10.1136/bmjopen-2019-035914), 2020-07-29
Supplement: bmjopen-2019-035914.draft_revisions.pdf [file bmjopen-2019-035914.draft_revisions.pdf]

# BMJ Open

BMJ Open is committed to open peer review. As part of this commitment we make the peer review history of every article we publish publicly available.

When an article is published we post the peer reviewers' comments and the authors' responses online. We also post the versions of the paper that were used during peer review. These are the versions that the peer review comments apply to.

The versions of the paper that follow are the versions that were submitted during the peer review process. They are not the versions of record or the final published versions. They should not be cited or distributed as the published version of this manuscript.

BMJ Open is an open access journal and the full, final, typeset and author-corrected version of record of the manuscript is available on our site with no access controls, subscription charges or pay-per-view fees (<http://bmjopen.bmj.com>).

If you have any questions on BMJ Open's open peer review process please email [info.bmjopen@bmj.com](mailto:info.bmjopen@bmj.com)

# BMJ Open

## Menstrual health and period poverty among young people who menstruate in the Barcelona metropolitan area (Spain): protocol of a mixed-methods study.

|                               |                                                                                                                                                                                                                                                                                                                                                                                                                                                                                                                                                                                                                                                                                                                                                                                              |
|-------------------------------|----------------------------------------------------------------------------------------------------------------------------------------------------------------------------------------------------------------------------------------------------------------------------------------------------------------------------------------------------------------------------------------------------------------------------------------------------------------------------------------------------------------------------------------------------------------------------------------------------------------------------------------------------------------------------------------------------------------------------------------------------------------------------------------------|
| Journal:                      | <i>BMJ Open</i>                                                                                                                                                                                                                                                                                                                                                                                                                                                                                                                                                                                                                                                                                                                                                                              |
| Manuscript ID                 | bmjopen-2019-035914                                                                                                                                                                                                                                                                                                                                                                                                                                                                                                                                                                                                                                                                                                                                                                          |
| Article Type:                 | Protocol                                                                                                                                                                                                                                                                                                                                                                                                                                                                                                                                                                                                                                                                                                                                                                                     |
| Date Submitted by the Author: | 21-Nov-2019                                                                                                                                                                                                                                                                                                                                                                                                                                                                                                                                                                                                                                                                                                                                                                                  |
| Complete List of Authors:     | Medina-Perucha, Laura; IDIAP Jordi Gol, Jacques-Aviñó, Constanza; IDIAP Jordi Gol; Universitat Autònoma de Barcelona<br>Valls-Llobet, Carme; Centro de Análisis y Programas Sanitarios (CAPS)<br>Turbau-Valls, Rosa; Institut Català de la Salut<br>Pinzón, Diana; SomiArte Taller<br>Hernández, Lola; La Caravana Roja<br>Briales Canseco, Paula; Comunidad de Madrid Consejería de Educación<br>López-Jiménez, Tomàs; Institut de Recerca en Atenció Primària Jordi Gol, Unitat Central de Recerca<br>Solana Lizarza, Enara<br>Munrós Feliu, Jordina; Institut Català de la Salut, Atenció a la Salut Sexual i Reproductiva (ASSIR) Muntanya/La Mina<br>Berenguera, Anna; Institut Universitari d'Investigació en Atenció Primària (IDIAP-Jordi Gol), ; Universitat Autònoma de Barcelona, |
| Keywords:                     | Menstrual health, Health services, Education, Young people, SOCIAL MEDICINE, PUBLIC HEALTH                                                                                                                                                                                                                                                                                                                                                                                                                                                                                                                                                                                                                                                                                                   |
|                               |                                                                                                                                                                                                                                                                                                                                                                                                                                                                                                                                                                                                                                                                                                                                                                                              |

SCHOLARONE™  
Manuscripts

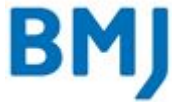

I, the Submitting Author has the right to grant and does grant on behalf of all authors of the Work (as defined in the below author licence), an exclusive licence and/or a non-exclusive licence for contributions from authors who are: i) UK Crown employees; ii) where BMJ has agreed a CC-BY licence shall apply, and/or iii) in accordance with the terms applicable for US Federal Government officers or employees acting as part of their official duties; on a worldwide, perpetual, irrevocable, royalty-free basis to BMJ Publishing Group Ltd ("BMJ") its licensees and where the relevant Journal is co-owned by BMJ to the co-owners of the Journal, to publish the Work in this journal and any other BMJ products and to exploit all rights, as set out in our [licence](#).

The Submitting Author accepts and understands that any supply made under these terms is made by BMJ to the Submitting Author unless you are acting as an employee on behalf of your employer or a postgraduate student of an affiliated institution which is paying any applicable article publishing charge ("APC") for Open Access articles. Where the Submitting Author wishes to make the Work available on an Open Access basis (and intends to pay the relevant APC), the terms of reuse of such Open Access shall be governed by a Creative Commons licence – details of these licences and which [Creative Commons](#) licence will apply to this Work are set out in our licence referred to above.

Other than as permitted in any relevant BMJ Author's Self Archiving Policies, I confirm this Work has not been accepted for publication elsewhere, is not being considered for publication elsewhere and does not duplicate material already published. I confirm all authors consent to publication of this Work and authorise the granting of this licence.

1  
2  
3 **Menstrual health and period poverty among young people who menstruate in the**  
4 **Barcelona metropolitan area (Spain): protocol of a mixed-methods study.**  
5

6  
7 Medina-Perucha, L.<sup>1</sup>, Jacques-Aviñó, C.<sup>1,2</sup>, Valls-Llobet, C.<sup>3</sup>, Turbau-Valls, R.<sup>4</sup>, Pinzón, D.<sup>5</sup>,  
8 Hernández, L.<sup>6</sup>, Briales Canseco, P.<sup>7</sup>, López-Jiménez, T.<sup>1,2</sup>, Solana Lizarza, E., Munrós Feliu,  
9 J.<sup>6</sup>, Berenguera-Ossó, A.<sup>1,2,7</sup>  
10  
11

12  
13 <sup>1</sup> Fundació Institut Universitari per a la recerca a l'Atenció Primària de Salut Jordi Gol i Gurina  
14 (IDIAPJGol), Barcelona, Spain.  
15

16  
17 <sup>2</sup> Universitat Autònoma de Barcelona, Bellaterra (Cerdanyola del Vallès), Spain.  
18

19  
20 <sup>3</sup> Centro de Análisis y Programas Sanitarios (CAPS), Barcelona, Spain.  
21

22  
23 <sup>4</sup> Institut Català de la Salut (ICS), Barcelona, Spain.  
24

25  
26 <sup>5</sup> SomiArte Taller, Barcelona, Spain.  
27

28  
29 <sup>6</sup> La Caravana Roja, Murcia, Spain.  
30

31  
32 <sup>7</sup> Consejería de Educación, Comunidad de Madrid, Madrid, Spain.  
33

34  
35 <sup>8</sup> Atenció a la Salut Sexual i Reproductiva (ASSIR) Muntanya/La Mina. Institut Català de la  
36 Salut (ICS), Barcelona, Spain.  
37

38  
39 <sup>9</sup> Departament d'Infermeria, Universitat de Girona, Girona, Spain  
40  
41  
42  
43  
44

45 **Corresponding author**  
46

47 Dr Laura Medina-Perucha

48 Fundació Institut Universitari per a la recerca a l'Atenció Primària de Salut Jordi Gol i Gurina  
49 (IDIAPJGol)  
50

51 Gran Via de les Corts Catalanes, 591, attic

52 08007 Barcelona (Spain)

53 lmedina@idiapjgol.info

54 (0034) 93 482 46 17  
55  
56  
57  
58  
59

60 **Word count:** 3,625.

## ABSTRACT

**Introduction.** The importance of menstrual health has been historically neglected, mostly due to taboos and misconceptions around menstruation and androcentrism within health knowledge and health systems around the world. There has also been a lack of attention on “period poverty”, which refers to the financial, social, cultural and political barriers to access menstrual products and education. The main aim of this research is to explore menstrual health and experiences of period poverty among young people who menstruate (YPM). **Methods and analysis.** This is a convergent mixed-methods study which will combine a quantitative transversal study to identify the prevalence of period poverty among YPM (11-16 years old), and a qualitative study that will focus on exploring menstruation-related experiences of YPM and other groups (young people who do not menstruate (YNM); primary healthcare professionals; educators; and policymakers). The study will be conducted in the Barcelona metropolitan area between 2020 and 2021. Data will be primarily collected at schools. Descriptive statistics will be performed for each variable to identify asymmetric distributions and it will be evaluated differences among groups. Thematic analysis will be used for qualitative data analyses. **Ethics and dissemination.** Several ethical issues have been considered, especially as this study includes the participation of underage participants. The study has received ethical approval by the Research Ethics Committee (IDIAPJGoL) [19/178-P]. Research findings will be disseminated to key audiences, such as YPM, YNM, parents/legal tutors, health professionals, educators, youth (and other relevant) organisations, general community members, stakeholders and policymakers, and academia.

## STRENGTHS AND LIMITATIONS OF THIS STUDY

- This research will address an important gap in research on menstrual health from a gender and intercultural approach.
- A mixed-methods design will allow for the integration of quantitative (descriptive) and qualitative (in-depth) data.
- This study includes collaborations with a variety of key actors, following Responsible and Research Innovation (RRI) guidelines.
- The dissemination strategy includes a variety of audiences and will be co-created with study participants.
- The combination of data collection methods, and using a RRI and participatory research approach will require increased resources and time.

## KEYWORDS

Menstrual health; period poverty; health services; education; young people

## INTRODUCTION

Research on menstrual health is still scarce. Moreover, most research has been conducted in low-income countries,[1–3], neglecting its need in high-income regions. Menstrual health is associated with the access of people who menstruate to accurate information on menstruation, menstrual products and clean and safe wash facilities. Also, with experiences related to the menstrual cycle and the use of menstrual health as a tool for health promotion. A good menstrual health also includes tackling menstruation-related taboos, stigma and discrimination[4]. Promoting menstrual health is key to reach gender equity and promote health among people who menstruate, and it has even been suggested that menstrual health should be incorporated as a vital sign,[5,6]. Despite a growing international commitment to focus on menstrual health, there is still much to be done[2]. In this study, we will focus on “people who menstruate” rather than “women” not to exclude those who have a menstrual cycle but are not women/do not identify as women (i.e., male transsexual or male transgender).

Activist-led movements have increased awareness on the negative impact that the cost of menstrual products, socio-cultural practices and views on menstruation have on women’s health and wellbeing. These movements aim at promoting a “menstrual culture” that demystifies the menstrual cycle and are based on feminist and socio-cultural paradigms. Together with some health professionals, activism in Spain is already suggesting body awareness and knowledge about one’s menstrual cycle as tools for health promotion. Menstrual health education is crucial to understand and improve how people who menstruate relate to their menstrual cycle,[4,7]. The role of the “menstrual products” and pharmaceutical industries in women’s menstrual health is however strong. It is precisely these companies the ones often delivering menstrual health education in schools in Spain. Considering these events enough for “menstrual health education” is questionable, as these companies rather focus on selling their products and medicalising menstruation instead of delivering high quality education on the menstrual cycle and the wide range of products available. In the meantime, many people who menstruate in Spain seem to still be unaware of how their menstrual cycle works and the relationship with their overall health.

Focusing on young people is crucial to understand their conceptions and experiences of menarche (first menstruation). Good health education among young people is a priority as their bodies are changing and leading to adulthood. As previously reported in a study by Plan International UK[4], it is essential that young people get access to menstrual health education, health services and products that protect their health and wellbeing. In this study, menstrual-related myths and taboos were prevalent among young people. Stigma and embarrassment were also still a reality for many girls as, for example, most girls did not feel comfortable discussing

1  
2  
3 menstruation with their school teachers. Besides and very importantly, most girls explained how  
4 they were unaware of what was happening and what to do when they first got their period[4].  
5 Another reason to focus on children and adolescents is that they are vulnerable groups to  
6 experiencing stigma, discrimination, and social and health inequities.  
7  
8  
9

10 Inequities between people who menstruate and people who do not menstruate are also to be  
11 highlighted. These are for example visible through the (still prevailing) stigma and  
12 discrimination towards people who menstruate and menstruation itself[4]. In line with this,  
13 productivity loss due to presentism and absenteeism at schools and workplaces among people  
14 who experience menstrual pain needs to be considered too[8]. Apart from the social and  
15 financial impacts of productivity loss, social and health inequities among people who  
16 menstruate (compared to people who do not menstruate) can be also explained when  
17 menstruating is a source of social (e.g., normalisation of menstrual pain) and structural (e.g., not  
18 being able to get sick leave for menstrual pain) sanctions.  
19  
20  
21  
22  
23  
24

25 The menstrual cycle is not a health condition to be medicalised. However, this is not how it  
26 seems to be conceived within society and healthcare systems. This project stems from an  
27 opposition to the predominant androcentrism in health science and healthcare systems. The  
28 concept of androcentrism refers to having men (male humans) as the reference, the norm and the  
29 example for all humans. In the health context this has translated into the invisibilisation of  
30 women, the female body and women's health in health science, policy and practice,[9–12]. As  
31 briefly mentioned already, this project also questions the role of the industry (menstrual  
32 products and pharmaceutical) in the medicalisation and socio-cultural conceptualisations of the  
33 menstrual cycle and menstruation[9]. Instead, it is important that the menstrual cycle is  
34 understood as a natural process that is associated with good health. This means that educating  
35 society and professionals is a priority to promote health among young people who menstruate  
36 (YPM). Increased education and a more positive conceptualisation of the menstrual cycle and  
37 menstruation could help YPM being more aware of their bodies and health. In turn, this could  
38 help encourage menstruators to care for their menstrual and general health, and aid the  
39 identification of some health conditions such as endometriosis[13]. Improved education could  
40 also lead the disassociation of menstruation and pain, and challenge myths and beliefs around  
41 the menstrual cycle and the use of hormonal contraception. Last but not least, education could  
42 reduce menstruation-related stigma and discrimination.  
43  
44  
45  
46  
47  
48  
49  
50  
51  
52  
53

54 One aspect of menstrual health is the access to menstrual products. Research in other countries,  
55 such as Uganda[3] and the United Kingdom[4] has highlighted experiences of *period poverty*  
56 among young women. This term refers to barriers (financial, social, cultural and political) in  
57 accessing menstrual products, menstrual education and access to healthcare services. Plan  
58  
59  
60

1  
2  
3 International UK[4] recently explored period poverty in a high-income country through focus  
4 groups with 64 adolescents. Their report revealed that 1 in 10 adolescents experienced period  
5 poverty in the United Kingdom. However, and to our knowledge, there have been no attempts to  
6 identify the prevalence of period poverty at a community or population level.  
7  
8  
9

10 Despite social movements to promote menstrual culture and reduce taxes of menstrual products  
11 in the last few years, menstrual health in Spain continues to be ignored. This is reflected in  
12 national and regional public health strategies, in which menstrual health is never present. Even  
13 if 27,7% of children were at risk of poverty in Catalunya in 2017[14], experiences of period  
14 poverty have not been explored. Social, cultural, financial and political barriers to promote  
15 menstrual health, tackle stigma and discrimination and eliminate period poverty have also been  
16 overlooked. Besides, menstrual products are not considered a necessity by law in Spain, holding  
17 a 10% tax (Spanish Law 37/1992, 28<sup>th</sup> December 2018). Despite in October 2018 the Spanish  
18 government guaranteed that tax retentions on menstrual product should be reduced to 4%, this  
19 tax reduction has not yet been applied.  
20  
21  
22  
23  
24  
25  
26

27 For the reasons stated above, this study will mainly explore menstrual health and experiences of  
28 period poverty among YPM. We also hope to identify barriers and facilitators that could  
29 promote menstrual health through the access of good-quality education and healthcare. Also, to  
30 explore ways to improve menstrual health experiences in YPM and reduce period poverty. This  
31 study will provide recommendations for future research, policy and practice, aiming at  
32 addressing social inequities of health in YPM (and especially amongst those that may be  
33 experiencing period poverty). The views of young people who do not menstruate and  
34 professionals will also be considered in this project. Through this research, our team aims to  
35 start a line of research on menstrual health and period poverty in the area of Barcelona, hoping  
36 to scale the study up to other areas in Spain.  
37  
38  
39  
40  
41  
42

### 43 **AIMS AND OBJECTIVES**

44  
45  
46 This project aims to explore menstrual health and experiences of period poverty among young  
47 people who menstruate (YPM) (11-16 years old). The study will be conducted in the Barcelona  
48 metropolitan area between 2019 and 2021.  
49  
50

51 The objectives will be:

- 52 1. To identify the prevalence of period poverty in YPM.
- 53 2. To explore socio-cultural understandings of menstruation and menstrual health in YPM,  
54 young people who do not menstruate (YNM) of the same age, health professionals,  
55 teachers, activists and policymakers.
- 56 3. To explore experiences of menstruation and period poverty among YPM.  
57  
58  
59  
60



4. To explore menstruation-related stigma and discrimination.
5. To identify barriers and facilitators to promote menstrual health, and to access education and healthcare for menstrual health.
6. To identify opportunities to improve menstrual health-related experiences of YPM and reduce period poverty.
7. Provide recommendations for future research, policy and practice.

## METHODS AND ANALYSIS

The study will be coordinated by the research team at the [Research Centre name]. However, a working group of women that includes health professionals, educators, youth representatives and menstrual health activists has been composed, considering Responsible Research and Innovation (RRI) guidelines[15]. The members of the working group will regularly contribute to the development of the project attending regular meetings. They will also be involved in developing key study materials (e.g., study protocol, non-validated questionnaire, topic guides) and writing research publications and other dissemination materials. Taking this Responsible and Research Innovation (RRI) approach will be key to conducting inclusive research not only *for* but *with* the community and other key agents. This research is based on gender-based and intercultural approach.

### Study design

This research is a convergent mixed-methods study that will include a quantitative study and a qualitative study. It will start in September 2019 and end in September 2021. A Gantt Chart is provided in Figure 1.

### Quantitative study

This is a cross-sectional questionnaire-based study. A non-standardised questionnaire will be mainly used to calculate the composite main variable “period poverty”. Other variables that will be measured, and that will contribute to develop the variable “period poverty” will be: 1) use of menstrual products, 2) financial (and other) barriers to access menstrual products, 3) use of hormonal contraception, 4) period pain and menstrual disorders, 5) mental health, 6) access to menstrual health consultations, 7) menstruation-related school absenteeism, 8) menstruation-related interference on school performance and other activities, 9) menstruation-related stigma and discrimination, 10) access to menstrual health education.

Sociodemographic data will also be collected (age, school, primary healthcare centre, deprivation index, household composition). All variables and sociodemographic data (except for the deprivation index) will be collected using the self-reported questionnaire. The deprivation

1  
2  
3 index will be calculated based on available databases such as the MEDEA deprivation  
4 index[16].  
5

#### 6 7 Qualitative study 8

9 There will be three phases of data collection for the qualitative study:  
10

11 Phase I. Semi-structured interviews using photo elicitation techniques[17]: 20 YPM will take  
12 part in semi-structured interviews using photo elicitation techniques. These interviews will take  
13 place in schools making sure that participants are in a familiar and comfortable environment.  
14 The interviews will focus on objectives 2-4.  
15  
16

17 Phase II. Group discussions: Nine group discussions (three with YPM only, three with YNM,  
18 and three mixed) will be run with an estimate of 45 YPM and 45 YNM. Participants for the  
19 group discussions will be stratified by age (11-12 years old, 13-14 years old, and 15-16 years  
20 old). Group discussions will be conducted within the natural context of a classroom.  
21 Observation and group discussion techniques will be used to collect data. Objectives 2-6 will be  
22 covered in this phase of data collection.  
23  
24

25 Phase III. World Café[18]: Health professionals, teachers, policymakers, activists and youth  
26 representatives will be invited to participate in a world café. There will be a maximum of 12  
27 professionals in the session. The aim of phase III will be to mainly address objectives 4-6.  
28  
29

#### 30 31 32 33 34 **Materials**

##### 35 36 37 Quantitative study 38

39 A non-standarised questionnaire will be devised for this study by the working group. Several  
40 meetings will be organised to work on the development of the variables and the questionnaire,  
41 following the guidance of previous research and published work on questionnaire design[19].  
42  
43

##### 44 45 46 Qualitative study 47

48 Topic guides will be developed for each phase of the qualitative study. Developing the topic  
49 guides will be a collaborative process between the research team and the working group. The  
50 topic guides will be based on the aims of this research, previous evidence, the team's expertise  
51 and data previously collected for this study (for Phase II and Phase III).  
52  
53

54 The main topic areas will be 1) socio-cultural understandings of menstruation and menstrual  
55 health; 2) personal experiences of menstruation; 3) experiences of period poverty; 4)  
56 experiences of menstruation-related stigma and discrimination; 5) barriers and facilitators to  
57 promote menstrual health, and to access education and healthcare for menstrual health; and 6)  
58  
59  
60

opportunities to improve menstrual health-related experiences of YPM and reduce period poverty.

## Participants

There will be different groups of participants: YPM, YNM, and professionals (health professionals, teachers, policymakers, activists, and youth representatives).

### Participant selection

For both the quantitative and qualitative studies recruitment will be non-probabilistic (as not all schools and individuals will have the same probability of being recruited) and purposive (as schools and participants will be selected based on the requirements of the study).

YPM and YNM will be recruited from (public, private and charter) schools in the Barcelona metropolitan area. Schools will be identified to be representative of the socioeconomic diversity in the Barcelona metropolitan area. The MEDEA index[16] will be used to determine the socioeconomic level of each school. Considering that around 18 schools will be recruited, we will aim to recruit three or four schools of each of the five MEDEA levels. First, permission will be requested from the council of each municipality where recruitment will take place. Then, schools will be contacted and informed about the study, based on a list of schools in the Barcelona metropolitan area and professional contacts of the working group of school staff. The researcher team will organise meetings at participating schools to inform the staff and children about the study. Information sheets and consent forms will be given to children to inform and ask parents and legal tutors consent to participate. An adapted information sheet will be given to minors, apart from the information sheets and consent forms for parents and legal tutors. Parents and legal tutors will be asked to return a signed copy of the consent form if they are willing for their children to participate. This procedure will be used for each stage of the project involving children (quantitative study and Phase I and II of the qualitative study).

In Phase III of the qualitative study, professionals will be recruited using snowballing techniques and through identifying key informants for this study. Diversity in the professionals' background and expertise will be considered to ensure diversity in the discourses. Participants will be required to sign an informed consent to take part in the study.

### Inclusion and exclusion criteria

The inclusion and exclusion criteria are available in Tables 1-3.

#### Table 1

*Inclusion and exclusion criteria of young people who menstruate (YPM)*

| <b>Young people who menstruate (YPM)</b>             |                                               |
|------------------------------------------------------|-----------------------------------------------|
| <b>Inclusion criteria</b>                            | <b>Exclusion criteria</b>                     |
| Are between 11 and 16 years old                      | Are below 11 or above 16 years old            |
| Are attending a participating school                 | Have not (and will not) menstruate            |
| Have (or will) menstruate                            | Cannot understand and/or provide consent      |
| Have given their consent to participate              | Cannot communicate well in Catalan or Spanish |
| Parents or legal tutors have signed the consent form |                                               |
| Have a good command of Catalan or Spanish            |                                               |

Table 2

*Inclusion and exclusion criteria of young people who do not menstruate (YNM)*

| <b>Young people who do not menstruate (YNM)</b>      |                                               |
|------------------------------------------------------|-----------------------------------------------|
| <b>Inclusion criteria</b>                            | <b>Exclusion criteria</b>                     |
| Are between 11 and 16 years old                      | Are below 11 or above 16 years old            |
| Are attending a participating school                 | Have (or will) menstruate                     |
| Have not (and will not) menstruate                   | Cannot understand and/or provide consent      |
| Have given their consent to participate              | Cannot communicate well in Catalan or Spanish |
| Parents or legal tutors have signed the consent form |                                               |
| Have a good command of Catalan or Spanish            |                                               |

Table 3

*Inclusion and exclusion criteria of professionals*

| <b>Professionals</b>                                               |                                                                           |
|--------------------------------------------------------------------|---------------------------------------------------------------------------|
| <b>Inclusion criteria</b>                                          | <b>Exclusion criteria</b>                                                 |
| Have experiences working in relevant areas of/for menstrual health | Do not have experiences working in relevant areas of/for menstrual health |
| Have signed the consent form                                       | Cannot understand and/or provide consent                                  |
| Have a good command of Catalan or Spanish                          | Cannot communicate well in Catalan or Spanish                             |

### Sample size

Quantitative study

1  
2  
3 A total of 871 YPM will be recruited for the quantitative study in 18 schools in the Barcelona  
4 Metropolitan area. The sample size is based on power calculations considering the composite  
5 variable “period poverty” as the main variable. Maximum indetermination of the main variable  
6 (proportion of 50%) was assumed. It was also considered that there are 53,354 young girls  
7 attending schools in the Barcelona metropolitan area between 11 and 16 years old. These  
8 assumptions were in order to obtain a precision of 5%, expecting that 50 young girls of each  
9 participating school will take part in the study. Also, due to the effect of the design an interclass  
10 correlation of 0,026 [3] will required a minimum of 871 participants (and 18 schools). These  
11 estimates have been calculated assuming an alfa risk of 5%. PASS software was used for the  
12 sample size calculations [PASS 15 Power Analysis and Sample Size Software (2017). NCSS,  
13 LLC. Kaysville, Utah, USA].  
14  
15  
16  
17  
18  
19

#### 20 21 Qualitative study

22  
23 Sixty-five YPM, 45 YNM and 12 professionals (health professionals, teachers, policymakers,  
24 activists, and youth representatives) will be recruited for the qualitative study. The sample size  
25 will be dependent on data saturation.  
26  
27  
28

#### 29 **Data analysis plan**

##### 30 31 Quantitative study

32  
33 Descriptive statistics will be used for each variable to identify asymmetric distributions. The  
34 continuous variables will be analysed as mean (SD) or median (25<sup>th</sup> and 75<sup>th</sup> centiles) based on  
35 the normality/non-normality of the distribution, and categorical variables will be described as  
36 percentages. To evaluate differences among groups, the appropriate statistics will be applied  
37 based on the type of variable and their distribution ( $\chi^2$ , F-distribution, Student’s t-distribution,  
38 analysis of variance, Mann-Whitney U and Kruskal-Wallis). To estimate the magnitude of the  
39 associations between the selected variables and period poverty, prevalence ratios and their 95%  
40 confidence intervals will be computed by general linear models (Poisson regression models with  
41 robust variance and logistics models).  
42  
43  
44  
45  
46  
47  
48

##### 49 50 Qualitative study

51  
52 Qualitative data will be analysed using Thematic Content Analysis[18]. Once the audio  
53 recordings are transcribed, the researchers will familiarise themselves with the data. This will  
54 lead to pre-analytical insights of the data. The next step will be to 1) identify relevant themes  
55 within the text, 2) divide the text into units of meaning, 3) coding of the data, 4) generation of  
56 categories by grouping codes, 5) analysis of each category, and 6) elaboration of new text. The  
57 results will be then discussed with the working group until consensus is reached (triangulation).  
58  
59  
60

## Ethical considerations

We have obtained the necessary ethical approvals prior to the start of the research from our organisation (IDIAPJGoL) [19/178-P]. We have considered a number of ethical issues. A main consideration is that this research involves the participation of individuals who are not able to give consent (minors). Child consent will be granted through representation (i.e., parents or legal tutors) according to the Spanish Law on Biomedical Research (14/2007).

All activities included in the study will be carried out according to existing guidance in ethics as indicated in the Universal Declaration on Bioethics and Human Rights adopted by UNESCO (19/10/2005); the Council of Europe Convention for the Protection of Human Rights and Dignity of the Human Being with regard to the Application of Biology and Medicine (1997) and its additional protocol on biomedical research (2005); the Helsinki Declaration (2013) and relevant EU laws (European Parliament and Council Directive 2001/20/EC); the Spanish Law on Biomedical Research (14/2007); and the LOPD (Spanish Law on Personal Data Protection) (3/2018).

### Informed consent

Verbal and written informed consent will be requested from all participants prior to their participation in the study. Most participants will be minors. This has important ethical implications. All information will be given to underage participants in a comprehensive way, and study materials will be adapted to ensure readability and comprehensiveness. Parents or legal guardians will be notified of their children's invitation to the study. A signed written consent will be requested from all parents or legal guardians for all underage participants. The researchers will ensure that participants are able to consent, and that they understand what their participation entails.

### Confidentiality and anonymity

Confidentiality and anonymity will be carefully ensured. Contact details will only be requested to those participants that are willing to take part in succeeding stages of the study. Physical identifiable data will be securely stored at the IDIAPJGoL in a locked cabinet. Digital information will be securely stored at the IDIAPJGoL secure portal. Only the research team will have access to the data. All data presented when disseminating the findings from this study will be anonymised. Anonymised data will be made available upon request to the authors.

### Potential risks

Taking part in this study will involve the discussion of sensitive topics (i.e., menstrual health, situations of inequity, sexual relationships, and other related topics) and involves the inclusion

1  
2  
3 of a vulnerable group (minors). Discussing sensitive topics and the inclusion of minors are  
4 necessary for the purposes of this study. In order to minimise these issues, information about the  
5 nature of the study will be disclosed prior to seeking consent and before initiating the data  
6 collection. The researchers will conduct the study sensitively at all times.  
7  
8  
9

10 A protocol has been prepared in case the researchers had immediate concerns of harm, or a  
11 participant gets distressed during their participation in the study. If this happened with underage  
12 participants, their school tutor and parents will be informed (with the participants' permission).  
13 Participation will be paused or stopped if a participant gets distressed. It will be the participant's  
14 decision whether they decide to continue taking part in the study. The research team will ensure  
15 that all participants are able to seek support and/or advice if needed.  
16  
17  
18  
19

20 All participants will be made aware of their right to withhold information that they are not  
21 willing to share, as well as withdrawing from the study or removing their data at any time (prior  
22 to data analyses).  
23  
24  
25

26 Participants taking part in the interviews, group discussion and World Café will receive a 10€  
27 voucher as a token of thanks for their participation.  
28  
29

### 30 **Dissemination strategy**

31  
32 The findings will be disseminated to key audiences. These will be YPM, YNM, parents and  
33 legal tutors, health professionals, educators, youth (and other relevant) organisations, general  
34 community members, stakeholders and policymakers, and academia.  
35  
36  
37

38 The dissemination strategy will include a dissemination project produced by YPM and YNM,  
39 with the support of the research team. The content and format will be chosen by YPM and  
40 YNM involved in the development of this dissemination project. Examples of formats would be  
41 an art exhibition or a book.  
42  
43  
44

45 The working group will also organise meetings and workshops at "citizen science" events and  
46 schools, aimed at several key audiences. These meetings and workshops will involve study  
47 participants (YPM, YNM, and professionals) who will co-lead the sessions.  
48  
49  
50

51 The working group will prepare short reports, policy briefs, presentations and meetings with  
52 stakeholders and policymakers, activists, health professionals, educators and youth (and other  
53 relevant) organisations. The materials, presentations and meetings will be prepared in  
54 collaboration with study participants.  
55  
56  
57  
58  
59  
60



On the other hand, scientific publications will be prepared. The study will also be presented at national and international conferences. This part of the strategy will be led by the research team, with the collaboration of the working group and study participants.

## REFERENCES

- 1 Haque SE, Rahman M, Itsuko K, *et al.* The effect of a school-based educational intervention on menstrual health: An intervention study among adolescent girls in Bangladesh. *BMJ Open* 2014;**4**:1–9. doi:10.1136/bmjopen-2013-004607
- 2 Sommer M, Schmitt M, Gruer C, *et al.* Neglect of menarche and menstruation in the USA. *Lancet* 2019;**393**:2302. doi:10.1016/S0140-6736(19)30300-9
- 3 Montgomery P, Hennegan J, Dolan C, *et al.* Menstruation and the Cycle of Poverty: A Cluster Quasi-Randomised Control Trial of Sanitary Pad and Puberty Education Provision in Uganda. *PLoS One* 2016;**11**:e0166122. <https://doi.org/10.1371/journal.pone.0166122>
- 4 Tingle, C & Vora S. Break the Barriers : Girls ' Experiences of. *Plan Int UK* 2018;:1–68. <https://plan-uk.org/file/plan-uk-break-the-barriers-report-032018pdf/download?token=Fs-HYP3v>
- 5 Matteson KA, Zaluski KM. Menstrual Health as a Part of Preventive Health Care. *Obstet Gynecol Clin North Am* 2019;**46**:441–53. doi:10.1016/j.ogc.2019.04.004
- 6 American College of Obstetricians & Gynecologists Committee on Adolescent Health Care. Opinion no. 651: Menstruation in girls and adolescents: using the menstrual cycle as a vital sign. *Obstet Gynecol* 2015;:e143–6.
- 7 Botello Hermosa A, Casado Mejía R. Significado Cultural De La Menstruación En Mujeres Españolas. *Cienc y enfermería* 2017;**23**:89–97. doi:10.4067/s0717-95532017000300089
- 8 Schoep ME, Adang EMM, Maas JWM, *et al.* Productivity loss due to menstruation-related symptoms: A nationwide cross-sectional survey among 32 748 women. *BMJ Open* 2019;**9**:1–10. doi:10.1136/bmjopen-2018-026186
- 9 Valls-Llobet C. *Mujeres, salud y poder*. Madrid: : Cátedra (Feminismos) 2009.
- 10 Levinson R. Sexism in Medicine. *Am J Nurs* 1976;**76**:426–31. doi:10.2307/3423886
- 11 Schiebinger L. Skeletons in the Closet: The First Illustrations of the Female Skeleton in



- 1  
2  
3 Eighteenth-Century Anatomy. *Representations* 1986;:42–82. doi:10.2307/2928435  
4  
5  
6 12 Martin E. The Egg and the Sperm: How Science Has Constructed a Romance Based on  
7 Stereotypical Male-Female Roles. *Signs (Chic)* 1991;16:485–  
8 501.<http://www.jstor.org/stable/3174586>  
9  
10  
11 13 Young K, Fisher J, Kirkman M. Women’s experiences of endometriosis: A systematic  
12 review and synthesis of qualitative research. *J Fam Plan Reprod Heal Care*  
13 2015;41:225–34. doi:10.1136/jfprhc-2013-100853  
14  
15  
16 14 IDESCAT. Encuesta de condiciones de vida 2017.  
17 2018.<https://www.idescat.cat/novetats/?id=2991&lang=es>  
18  
19  
20 15 Owen R, Macnaghten P, Stilgoe J. Responsible research and innovation: From science in  
21 society to science for society, with society. *Sci Public Policy* 2012;39:751–60.  
22 doi:10.1093/scipol/scs093  
23  
24  
25 16 Domínguez-Berjón, M. F. Borrell C, Cano-Serral G, Esnaola S, *et al.* Construcción de un  
26 índice de privación a partir de datos censales en grandes ciudades españolas (Proyecto  
27 MEDEA). *Gac Sanit* 2008;22:179–87.  
28  
29  
30 17 Minkler M, Wallerstein N. *Community based participatory research for health: Process*  
31 *to outcomes*. 2nd ed. San Francisco: : Jossey Bass 2008.  
32  
33  
34 18 Berenguera A, Fernández de Sanmamed MJ, Pons M, *et al.* *To Listen, To Observe and*  
35 *To Understand. Bringing Back Narrative into the Health Sciences. Contributions of*  
36 *Qualitative Research*. Barcelona: : Institut Universitari d’Investigació en Atenció  
37 Primària Jordi Gol (IDIAPJGol) 2017.  
38  
39  
40 19 Boynton PM, Greenhalgh T. Hands-on guide to questionnaire research: Selecting,  
41 designing, and developing your questionnaire. *Br Med J* 2004;328:1312–5.  
42 doi:10.1136/bmj.328.7451.1312  
43  
44  
45  
46  
47

## AUTHORS’ CONTRIBUTIONS

48  
49  
50  
51 LMP has led and coordinated the conception and design of this study. She has written this  
52 manuscript. ABO has been involved in the conception and design in this study. She has  
53 reviewed and made substantial contributions to this manuscript. TLJ has contributed to the  
54 design of the quantitative study, performed power calculations and written the plan for the  
55 quantitative data analyses. He has reviewed and made substantial contributions to this  
56  
57  
58  
59  
60

1  
2  
3 manuscript. CJA, CVL, RTV, DP, LH, PBC, ESL and JMF have contributed to the design of  
4 this study. She has reviewed and made substantial contributions to this manuscript.  
5  
6

#### 7 **FUNDING STATEMENT**

8  
9 This work was supported by The European Society of Contraception and Reproductive Health,  
10 project number P-2019-A-01.  
11  
12

#### 13 **COMPETING INTEREST STATEMENT**

14  
15  
16 The authors declare no conflict of interest.  
17

#### 18 **ACKNOWLEDGEMENTS**

19  
20  
21 We would like to thank all women (and men) who contributed to the ideas captured in this  
22 protocol.  
23  
24  
25  
26  
27  
28  
29  
30  
31  
32  
33  
34  
35  
36  
37  
38  
39  
40  
41  
42  
43  
44  
45  
46  
47  
48  
49  
50  
51  
52  
53  
54  
55  
56  
57  
58  
59  
60

1  
2  
3  
4  
5  
6  
7  
8  
9  
10  
11  
12  
13  
14  
15  
16  
17  
18  
19  
20  
21  
22  
23  
24  
25  
26  
27  
28  
29  
30  
31  
32  
33  
34  
35  
36  
37  
38  
39  
40  
41  
42  
43  
44  
45  
46

**FIGURES**

| STUDY PHASES                           | TASKS                              | TEAM                        | Year 1 |   |   |   |   |   |   |   |   |    |    |    | Year 2 |   |   |   |   |   |   |   |   |    |    |    |
|----------------------------------------|------------------------------------|-----------------------------|--------|---|---|---|---|---|---|---|---|----|----|----|--------|---|---|---|---|---|---|---|---|----|----|----|
|                                        |                                    |                             | Months |   |   |   |   |   |   |   |   |    |    |    | Months |   |   |   |   |   |   |   |   |    |    |    |
|                                        |                                    |                             | 1      | 2 | 3 | 4 | 5 | 6 | 7 | 8 | 9 | 10 | 11 | 12 | 1      | 2 | 3 | 4 | 5 | 6 | 7 | 8 | 9 | 10 | 11 | 12 |
| <b>Transversal</b>                     | Meetings research group            | Research team               | █      | █ | █ | █ | █ | █ | █ | █ | █ | █  | █  | █  | █      | █ | █ | █ | █ | █ | █ | █ | █ | █  |    |    |
|                                        | Meetings working group             | Working group               | █      | █ | █ | █ | █ | █ | █ | █ | █ | █  | █  | █  | █      | █ | █ | █ | █ | █ | █ | █ | █ | █  |    |    |
| <b>Study preparation</b>               | Ethical approvals                  | Research team               | █      |   |   |   |   |   |   |   |   |    |    |    |        |   |   |   |   |   |   |   |   |    |    |    |
|                                        | Creation of working group          | Research team               | █      |   |   |   |   |   |   |   |   |    |    |    |        |   |   |   |   |   |   |   |   |    |    |    |
|                                        | Development of study protocol      | Working group               | █      |   |   |   |   |   |   |   |   |    |    |    |        |   |   |   |   |   |   |   |   |    |    |    |
|                                        | Development of study materials     | Working group               | █      | █ | █ |   |   |   |   |   |   |    |    |    |        |   |   |   |   |   |   |   |   |    |    |    |
|                                        | Establish contacts for recruitment | Working group               | █      | █ | █ | █ |   |   |   |   |   |    |    |    |        |   |   |   |   |   |   |   |   |    |    |    |
| <b>Recruitment and data collection</b> | Recruitment schools                | Working group               |        |   |   |   | █ |   |   |   |   |    |    |    |        |   |   |   |   |   |   |   |   |    |    |    |
|                                        | Recruitment participants           | Research team               |        |   |   |   | █ |   |   |   |   |    |    |    |        |   |   |   |   |   |   |   |   |    |    |    |
|                                        | Completion of questionnaires       | Research team               |        |   |   |   | █ | █ |   |   |   |    |    |    |        |   |   |   |   |   |   |   |   |    |    |    |
|                                        | Individual interviews              | Research team               |        |   |   |   | █ | █ | █ |   |   |    |    |    |        |   |   |   |   |   |   |   |   |    |    |    |
|                                        | Group discussions                  | Research team               |        |   |   |   |   |   |   | █ | █ |    |    |    |        |   |   |   |   |   |   |   |   |    |    |    |
|                                        | World Café                         | Research team               |        |   |   |   |   |   |   |   |   | █  | █  |    |        |   |   |   |   |   |   |   |   |    |    |    |
| <b>Data analyses</b>                   | Transcribing                       | Research team; transcriber  |        |   |   |   | █ | █ | █ | █ | █ | █  |    |    |        |   |   |   |   |   |   |   |   |    |    |    |
|                                        | Quantitative analyses              | Research team               |        |   |   |   | █ | █ |   |   |   |    |    |    |        |   |   |   |   |   |   |   |   |    |    |    |
|                                        | Qualitative analyses               | Research team               |        |   |   |   |   |   |   |   |   | █  | █  |    |        |   |   |   |   |   |   |   |   |    |    |    |
|                                        | Discussion of results              | Working group               |        |   |   |   | █ | █ | █ | █ | █ | █  | █  |    |        |   |   |   |   |   |   |   |   |    |    |    |
| <b>Dissemination</b>                   | Dissemination project              | Participants; working group |        |   |   |   |   |   |   |   |   |    |    |    |        |   | █ | █ | █ |   |   |   |   |    |    |    |
|                                        | Dissemination of final product     | Participants; working group |        |   |   |   |   |   |   |   |   |    |    |    |        |   |   | █ | █ | █ | █ | █ | █ | █  |    |    |
|                                        | Dissemination of results           | Working group               | █      | █ | █ | █ | █ | █ | █ | █ | █ | █  | █  | █  | █      | █ | █ | █ | █ | █ | █ | █ | █ | █  |    |    |



# BMJ Open

## Menstrual health and period poverty among young people who menstruate in the Barcelona metropolitan area (Spain): protocol of a mixed-methods study.

|                                 |                                                                                                                                                                                                                                                                                                                                                                                                                                                                                                                                                                                                                                                                                                                                                                                                                              |
|---------------------------------|------------------------------------------------------------------------------------------------------------------------------------------------------------------------------------------------------------------------------------------------------------------------------------------------------------------------------------------------------------------------------------------------------------------------------------------------------------------------------------------------------------------------------------------------------------------------------------------------------------------------------------------------------------------------------------------------------------------------------------------------------------------------------------------------------------------------------|
| Journal:                        | <i>BMJ Open</i>                                                                                                                                                                                                                                                                                                                                                                                                                                                                                                                                                                                                                                                                                                                                                                                                              |
| Manuscript ID                   | bmjopen-2019-035914.R1                                                                                                                                                                                                                                                                                                                                                                                                                                                                                                                                                                                                                                                                                                                                                                                                       |
| Article Type:                   | Protocol                                                                                                                                                                                                                                                                                                                                                                                                                                                                                                                                                                                                                                                                                                                                                                                                                     |
| Date Submitted by the Author:   | 26-Mar-2020                                                                                                                                                                                                                                                                                                                                                                                                                                                                                                                                                                                                                                                                                                                                                                                                                  |
| Complete List of Authors:       | Medina-Perucha, Laura; IDIAP Jordi Gol, Jacques-Aviñó, Constanza; IDIAP Jordi Gol; Universitat Autònoma de Barcelona<br>Valls-Llobet, Carme; Centro de Análisis y Programas Sanitarios (CAPS) Turbau-Valls, Rosa; Institut Català de la Salut<br>Pinzón, Diana; SomiArte Taller; Universitat Autònoma de Barcelona<br>Hernández, Lola; La Caravana Roja<br>Briales Canseco, Paula; Comunidad de Madrid Consejería de Educación<br>López-Jiménez, Tomàs; Institut de Recerca en Atenció Primària Jordi Gol, Unitat Central de Recerca<br>Solana Lizarza, Enara<br>Munrós Feliu, Jordina; Institut Català de la Salut, Atenció a la Salut Sexual i Reproductiva (ASSIR) Muntanya/La Mina<br>Berenguera, Anna; Institut Universitari d'Investigació en Atenció Primària (IDIAP-Jordi Gol), ; Universitat Autònoma de Barcelona, |
| <b>Primary Subject Heading</b>: | Obstetrics and gynaecology                                                                                                                                                                                                                                                                                                                                                                                                                                                                                                                                                                                                                                                                                                                                                                                                   |
| Secondary Subject Heading:      | Public health                                                                                                                                                                                                                                                                                                                                                                                                                                                                                                                                                                                                                                                                                                                                                                                                                |
| Keywords:                       | Menstrual health, Health services, Education, Young people, SOCIAL MEDICINE, PUBLIC HEALTH                                                                                                                                                                                                                                                                                                                                                                                                                                                                                                                                                                                                                                                                                                                                   |
|                                 |                                                                                                                                                                                                                                                                                                                                                                                                                                                                                                                                                                                                                                                                                                                                                                                                                              |

SCHOLARONE™  
Manuscripts



I, the Submitting Author has the right to grant and does grant on behalf of all authors of the Work (as defined in the below author licence), an exclusive licence and/or a non-exclusive licence for contributions from authors who are: i) UK Crown employees; ii) where BMJ has agreed a CC-BY licence shall apply, and/or iii) in accordance with the terms applicable for US Federal Government officers or employees acting as part of their official duties; on a worldwide, perpetual, irrevocable, royalty-free basis to BMJ Publishing Group Ltd ("BMJ") its licensees and where the relevant Journal is co-owned by BMJ to the co-owners of the Journal, to publish the Work in this journal and any other BMJ products and to exploit all rights, as set out in our [licence](#).

The Submitting Author accepts and understands that any supply made under these terms is made by BMJ to the Submitting Author unless you are acting as an employee on behalf of your employer or a postgraduate student of an affiliated institution which is paying any applicable article publishing charge ("APC") for Open Access articles. Where the Submitting Author wishes to make the Work available on an Open Access basis (and intends to pay the relevant APC), the terms of reuse of such Open Access shall be governed by a Creative Commons licence – details of these licences and which [Creative Commons](#) licence will apply to this Work are set out in our licence referred to above.

Other than as permitted in any relevant BMJ Author's Self Archiving Policies, I confirm this Work has not been accepted for publication elsewhere, is not being considered for publication elsewhere and does not duplicate material already published. I confirm all authors consent to publication of this Work and authorise the granting of this licence.

1  
2  
3 **Menstrual health and period poverty among young people who menstruate in the**  
4 **Barcelona metropolitan area (Spain): protocol of a mixed-methods study.**  
5

6  
7 Medina-Perucha, L.<sup>1</sup>, Jacques-Aviñó, C.<sup>1,2,3</sup>, Valls-Llobet, C.<sup>4</sup>, Turbau-Valls, R.<sup>5</sup>, Pinzón, D.<sup>2,6</sup>,  
8 Hernández, L.<sup>7</sup>, Briales Canseco, P.<sup>8</sup>, López-Jiménez, T.<sup>1,2</sup>, Solana Lizarza, E., Munrós Feliu,  
9 J.<sup>9</sup>, Berenguera-Ossó, A.<sup>1,2,10</sup>  
10  
11

12  
13 <sup>1</sup> Fundació Institut Universitari per a la recerca a l'Atenció Primària de Salut Jordi Gol i Gurina  
14 (IDIAPJGol), Barcelona, Spain.  
15

16  
17 <sup>2</sup> Universitat Autònoma de Barcelona, Bellaterra (Cerdanyola del Vallès), Spain.  
18

19  
20 <sup>3</sup> Medical Anthropological Research Center (MARC-URV), Tarragona,  
21 Spain.  
22

23  
24 <sup>4</sup> Centro de Análisis y Programas Sanitarios (CAPS), Barcelona, Spain.  
25

26  
27 <sup>5</sup> Institut Català de la Salut (ICS), Barcelona, Spain.  
28

29  
30 <sup>6</sup> SomiArte Taller, Barcelona, Spain.  
31

32  
33 <sup>7</sup> La Caravana Roja, Murcia, Spain.  
34

35  
36 <sup>8</sup> Consejería de Educación, Comunidad de Madrid, Madrid, Spain.  
37

38  
39 <sup>9</sup> Atenció a la Salut Sexual i Reproductiva (ASSIR) Muntanya/La Mina. Institut Català de la  
40 Salut (ICS), Barcelona, Spain.  
41

42  
43 <sup>10</sup> Departament d'Infermeria, Universitat de Girona, Girona, Spain  
44  
45

46 **Corresponding author**  
47

48 Dr Laura Medina-Perucha

49 Fundació Institut Universitari per a la recerca a l'Atenció Primària de Salut Jordi Gol i Gurina  
50 (IDIAPJGol)

51 Gran Via de les Corts Catalanes, 591, attic

52 08007 Barcelona (Spain)

53 lmedina@idiapjgol.info

54 (0034) 93 482 46 17  
55  
56  
57  
58  
59  
60

1  
2  
3 **Word count:** 3,920.

4 **ABSTRACT**

5  
6  
7 **Introduction.** The importance of menstrual health has been historically neglected, mostly due to  
8 taboos and misconceptions around menstruation and androcentrism within health knowledge and  
9 health systems around the world. There has also been a lack of attention on “period poverty”,  
10 which refers to the financial, social, cultural and political barriers to access menstrual products  
11 and education. The main aim of this research is to explore menstrual health and experiences of  
12 period poverty among young people who menstruate (YPM). **Methods and analysis.** This is a  
13 convergent mixed-methods study which will combine a quantitative transversal study to identify  
14 the prevalence of period poverty among YPM (11-16 years old), and a qualitative study that will  
15 focus on exploring menstruation-related experiences of YPM and other groups (young people  
16 who do not menstruate (YNM); primary healthcare professionals; educators; and policymakers).  
17 The study will be conducted in the Barcelona metropolitan area between 2020 and 2021. Eighteen  
18 schools and 871 YPM will be recruited for the quantitative study. Sixty-five YPM will participate  
19 in the qualitative study. Forty-five YNM and 12 professionals will also be recruited to take part  
20 in the qualitative study. Socioeconomic and cultural diversity will be main vectors for recruitment,  
21 to ensure the findings are representative to the social and cultural context. Descriptive statistics  
22 will be performed for each variable to identify asymmetric distributions and it will be evaluated  
23 differences among groups. Thematic analysis will be used for qualitative data analyses. **Ethics**  
24 **and dissemination.** Several ethical issues have been considered, especially as this study includes  
25 the participation of underage participants. The study has received ethical approval by the  
26 IDIAPJGol Research Ethics Committee [19/178-P]. Research findings will be disseminated to  
27 key audiences, such as YPM, YNM, parents/legal tutors, health professionals, educators, youth  
28 (and other relevant) organisations, general community members, stakeholders and policymakers,  
29 and academia.

30  
31  
32  
33  
34  
35  
36  
37  
38  
39  
40  
41  
42  
43  
44 **STRENGTHS AND LIMITATIONS OF THIS STUDY**

- 45  
46  
47  
48  
49  
50  
51  
52  
53  
54  
55  
56  
57  
58  
59  
60
- This study will address an important research gap on menstrual health and period poverty in high-income settings, from a gender and intercultural approach.
  - A mixed-methods design will allow for the integration of quantitative (descriptive) and qualitative (in-depth) data.
  - This study includes collaborations with a variety of key actors, following Responsible and Research Innovation (RRI) guidelines.
  - The dissemination strategy includes a variety of audiences and will be co-created with study participants.



- The combination of data collection methods, and using a RRI and participatory research approach will require increased resources and time.

## KEYWORDS

Menstrual health; period poverty; health services; education; young people

## INTRODUCTION

Research on menstrual health is still scarce. Moreover, most research has been conducted in low-income countries,[1–3], neglecting its need in high-income regions. Menstrual health is associated with the access of people who menstruate to accurate information on menstruation, menstrual products and clean and safe wash facilities. Also, with experiences related to the menstrual cycle and the use of menstrual health as a tool for health promotion. A good menstrual health also includes tackling menstruation-related taboos, stigma and discrimination[4]. Promoting menstrual health is key to reach gender equity and promote health among people who menstruate, and it has even been suggested that menstrual health should be incorporated as a vital sign,[5,6]. Despite a growing international commitment to focus on menstrual health, there is still much to be done[2]. In this study, we will focus on “people who menstruate” rather than “women” not to exclude those who have a menstrual cycle but are not women/do not identify as women (e.g., male transsexual or male transgender).

Activist-led movements have increased awareness on the negative impact that the cost of menstrual products, socio-cultural practices and views on menstruation have on women’s health and wellbeing. These movements aim at promoting a “menstrual culture” that demystifies the menstrual cycle and are based on feminist and socio-cultural paradigms. Together with some health professionals, activism in Spain is already suggesting body awareness and knowledge about one’s menstrual cycle as tools for health promotion. Menstrual health education is crucial to understand and improve how people who menstruate relate to their menstrual cycle,[4,7]. The role of the “menstrual products” and pharmaceutical industries in women’s menstrual health is however strong. It is precisely these companies the ones often delivering menstrual health education in schools in Spain. Considering these events enough for “menstrual health education” is questionable, as these companies rather focus on selling their products and medicalising menstruation instead of delivering high quality education on the menstrual cycle and the wide range of products available. In the meantime, many people who menstruate in Spain seem to still be unaware of how their menstrual cycle works and the relationship with their overall health.

Focusing on young people is crucial to understand their conceptions and experiences of menarche (first menstruation). Good health education among young people is a priority as their bodies are

1  
2  
3 changing and leading to adulthood. As previously reported in a study by Plan International UK[4],  
4 it is essential that young people get access to menstrual health education, health services and  
5 products that protect their health and wellbeing. In this study, menstrual-related myths and taboos  
6 were prevalent among young people. Stigma and embarrassment were also still a reality for many  
7 girls as, for example, most girls did not feel comfortable discussing menstruation with their school  
8 teachers. Besides and very importantly, most girls explained how they were unaware of what was  
9 happening and what to do when they first got their period[4]. Another reason to focus on children  
10 and adolescents is that they are vulnerable groups to experiencing stigma, discrimination, and  
11 social and health inequities.  
12  
13

14  
15  
16  
17  
18 Inequities between people who menstruate and people who do not menstruate are also to be  
19 highlighted. These are for example visible through the (still prevailing) stigma and discrimination  
20 towards people who menstruate and menstruation itself[4]. In line with this, productivity loss due  
21 to presentism and absenteeism at schools and workplaces among people who experience  
22 menstrual pain needs to be considered too[8]. Apart from the social and financial impacts of  
23 productivity loss, social and health inequities among people who menstruate (compared to people  
24 who do not menstruate) can be also explained when menstruating is a source of social (e.g.,  
25 normalisation of menstrual pain) and structural (e.g., not being able to get sick leave for menstrual  
26 pain) sanctions.  
27  
28  
29  
30  
31  
32

33  
34  
35  
36  
37  
38  
39  
40  
41  
42  
43  
44  
45  
46  
47  
48  
49  
50  
51  
52  
53  
54  
55  
56  
57  
58  
59  
60  
The menstrual cycle is not a health condition to be medicalised. However, this is not how it seems  
to be conceived within society and healthcare systems. This project stems from an opposition to  
the predominant androcentrism in health science and healthcare systems. The concept of  
androcentrism refers to having men (male humans) as the reference, the norm and the example  
for all humans. In the health context this has translated into the invisibilisation of women, the  
female body and women's health in health science, policy and practice,[9–12]. As briefly  
mentioned already, this project also questions the role of the industry (menstrual products and  
pharmaceutical) in the medicalisation and socio-cultural conceptualisations of the menstrual cycle  
and menstruation[9]. Instead, it is important that the menstrual cycle is understood as a natural  
process that is associated with good health. This means that educating society and professionals  
is a priority to promote health among young people who menstruate (YPM). Increased education  
and a more positive conceptualisation of the menstrual cycle and menstruation could help YPM  
being more aware of their bodies and health. In turn, this could help encourage menstruators to  
care for their menstrual and general health, and aid the identification of some health conditions  
such as endometriosis[13]. Improved education could also lead the disassociation of menstruation  
and pain, and challenge myths and beliefs around the menstrual cycle and the use of hormonal  
contraception. Last but not least, education could reduce menstruation-related stigma and  
discrimination.

1  
2  
3 One aspect of menstrual health is the access to menstrual products. Research in other countries,  
4 such as Uganda[3] and the United Kingdom[4] has highlighted experiences of *period poverty*  
5 among young women. This term refers to barriers (financial, social, cultural and political) in  
6 accessing menstrual products, menstrual education and access to healthcare services. Plan  
7 International UK[4] recently explored period poverty in a high-income country through focus  
8 groups with 64 adolescents. Their report revealed that 1 in 10 adolescents experienced period  
9 poverty in the United Kingdom. However, and to our knowledge, there have been no attempts to  
10 identify the prevalence of period poverty at a community or population level.  
11  
12  
13  
14  
15

16  
17 Despite social movements to promote menstrual culture and reduce taxes of menstrual products  
18 in the last few years, menstrual health in Spain continues to be ignored. This is reflected in  
19 national and regional public health strategies, in which menstrual health is never present. Even if  
20 27,7% of children were at risk of poverty in Catalunya in 2017[14], experiences of period poverty  
21 among children and adolescents have not been explored. Social, cultural, financial and political  
22 barriers to promote menstrual health, tackle stigma and discrimination and eliminate period  
23 poverty have also been overlooked. Besides, menstrual products are not considered a necessity  
24 by law in Spain, holding a 10% tax (Spanish Law 37/1992, 28<sup>th</sup> December 2018). Despite in  
25 October 2018 the Spanish government guaranteed that tax retentions on menstrual product should  
26 be reduced to 4%, this tax reduction has not yet been applied.  
27  
28  
29  
30  
31  
32

33  
34 For the reasons stated above, this study will mainly explore menstrual health and experiences of  
35 period poverty among YPM. We also hope to identify barriers and facilitators that could promote  
36 menstrual health through the access of good-quality education and healthcare. Also, to explore  
37 ways to improve menstrual health experiences in YPM and reduce period poverty. This study will  
38 provide recommendations for future research, policy and practice, aiming at addressing social  
39 inequities of health in YPM (and especially amongst those that may be experiencing period  
40 poverty) in Spain and other high-income countries with similar sociocultural contexts. The views  
41 of young people who do not menstruate and professionals will also be considered in this project.  
42 Through this research, our team aims to start a line of research on menstrual health and period  
43 poverty in the area of Barcelona, hoping to scale the study up to other areas in Spain.  
44  
45  
46  
47  
48  
49

## 50 **AIMS AND OBJECTIVES**

51  
52 This project aims to explore menstrual health and experiences of period poverty among young  
53 people who menstruate (YPM) (11-16 years old). The study will be conducted in the Barcelona  
54 metropolitan area between 2019 and 2021.  
55  
56

57  
58 The objectives will be:

- 59 1. To identify the prevalence of period poverty in YPM.  
60

- 2.
3. To explore socio-cultural understandings of menstruation and menstrual health in YPM, young people who do not menstruate (YNM) of the same age, health professionals, teachers, activists and policymakers.
4. To explore experiences of menstruation and period poverty among YPM.
5. To explore menstruation-related stigma and discrimination.
6. To identify barriers and facilitators to promote menstrual health, and to access education and healthcare for menstrual health.
7. To identify opportunities to improve menstrual health-related experiences of YPM and reduce period poverty.
8. Provide recommendations for future research, policy and practice.

## METHODS AND ANALYSIS

The study will be coordinated by the research team at the [Research Centre name]. However, a working group of women that includes health professionals, educators, youth representatives and menstrual health activists has been composed, considering Responsible Research and Innovation (RRI) guidelines[15]. The members of the working group will regularly contribute to the development of the project attending regular meetings. They will also be involved in developing key study materials (e.g., study protocol, non-validated questionnaire, topic guides) and writing research publications and other dissemination materials. Taking this Responsible and Research Innovation (RRI) approach will be key to conducting inclusive research not only *for* but *with* the community and other key agents. This research is based on gender-based [9,16,17] and intercultural approach [18–20]. These approaches go in line with acknowledging sociocultural differences and embracing a respectful and non-discriminatory perspective on research.

### Study design

This research is a convergent mixed-methods study that will include a quantitative study and a qualitative study. Quantitative research will allow to quantify the extent of period poverty and some menstrual health experiences. Qualitative research will provide an in-depth exploration of these phenomena. It will start in September 2019 and end in September 2021. A Gantt Chart is provided in Figure 1. Data will be collected in Catalan and Spanish, both mother tongues in the Barcelona metropolitan area.

### Quantitative study

This is a cross-sectional questionnaire-based study. A non-standardised questionnaire will be used to calculate the composite main variable “period poverty”. Other variables that will be measured and will be used to develop the variable “period poverty”. These will be: 1) use of menstrual

1  
2  
3 products, 2) financial (and other) barriers to access menstrual products, 3) use of hormonal  
4 contraception, 4) period pain and menstrual disorders, 5) mental health, 6) access to menstrual  
5 health consultations, 7) menstruation-related school absenteeism, 8) menstruation-related  
6 interference on school performance and other activities, 9) menstruation-related stigma and  
7 discrimination, 10) access to menstrual health education, and 11) menstrual hygiene and  
8 management.  
9  
10  
11

12  
13 Sociodemographic data will also be collected (age, school, primary healthcare centre, deprivation  
14 index, household composition). All variables and sociodemographic data (except for the  
15 deprivation index) will be collected using the self-reported questionnaire. The deprivation index  
16 will be calculated based on available databases such as the MEDEA deprivation index[21].  
17  
18  
19

## 20 Qualitative study

21  
22  
23 There will be three phases of data collection for the qualitative study:  
24

25 Phase I. Semi-structured interviews using photo elicitation techniques[22]: 20 YPM will take part  
26 in semi-structured interviews using photo elicitation techniques. These interviews will take place  
27 in schools making sure that participants are in a familiar and comfortable environment. The  
28 interviews will focus on objectives 2-4.  
29  
30

31  
32 Phase II. Group discussions: Nine group discussions (three with YPM only, three with YNM, and  
33 three mixed) will be run with an estimate of 45 YPM and 45 YNM. Participants for the group  
34 discussions will be stratified by age (11-12 years old, 13-14 years old, and 15-16 years old). Group  
35 discussions will be conducted within the natural context of a classroom. Observation and group  
36 discussion techniques will be used to collect data. Objectives 2-6 will be covered in this phase of  
37 data collection.  
38  
39

40  
41 Phase III. World Café[23]: Health professionals, teachers, policymakers, activists and youth  
42 representatives will be invited to participate in a world café. There will be a maximum of 12  
43 professionals in the session. The aim of phase III will be to mainly address objectives 4-6.  
44  
45  
46  
47

## 48 **Materials**

### 49 Quantitative study

50  
51 A non-standardised questionnaire has been devised for this study by the working group (see  
52 supplementary material). Several meetings were organised to work on the development of the  
53 variables and the questionnaire, following the guidance of previous research and published work  
54 on questionnaire design [24].  
55  
56  
57  
58  
59  
60

## Qualitative study

Topic guides will be developed for each phase of the qualitative study. Developing the topic guides will be a collaborative process between the research team and the working group. The topic guides will be based on the aims of this research, previous evidence, the team's expertise and data previously collected for this study (for Phase II and Phase III).

The main topic areas will be 1) socio-cultural understandings of menstruation and menstrual health; 2) personal experiences of menstruation; 3) experiences of period poverty; 4) experiences of menstruation-related stigma and discrimination; 5) barriers and facilitators to promote menstrual health, and to access education and healthcare for menstrual health; and 6) opportunities to improve menstrual health-related experiences of YPM and reduce period poverty.

All materials for the quantitative and qualitative studies will be piloted with the target population before using them for data collection.

## Participants

There will be different groups of participants: YPM, YNM, and professionals (health professionals, teachers, policymakers, activists, and youth representatives).

### Participant selection

For both the quantitative and qualitative studies recruitment will be non-probabilistic (as not all schools and individuals will have the same probability of being recruited) and purposive (as schools and participants will be selected based on the requirements of the study).

YPM and YNM will be recruited from (public, private and charter) schools in the Barcelona metropolitan area. Schools will be identified to be representative of the socioeconomic diversity in the Barcelona metropolitan area. The MEDEA index[21] will be used to determine the socioeconomic level of each school. Cultural diversity will also be a factor for recruiting schools and individuals. The team will ensure that the experiences of socially excluded communities, such as the gipsy community and migrants, are represented in this research. Considering that around 18 schools will be recruited, we will aim to recruit three or four schools of each of the five MEDEA levels. First, permission will be requested from the council of each municipality where recruitment will take place. Then, schools will be contacted and informed about the study, based on a list of schools in the Barcelona metropolitan area and professional contacts of the working group of school staff. The researcher team will organise meetings at participating schools to inform the staff and children about the study. Information sheets and consent forms will be given to children to inform and ask parents and legal tutors consent to participate. An adapted information sheet will be given to minors, apart from the information sheets and consent forms

for parents and legal tutors. Parents and legal tutors will be asked to return a signed copy of the consent form if they are willing for their children to participate. This procedure will be used for each stage of the project involving children (quantitative study and Phase I and II of the qualitative study).

In Phase III of the qualitative study, professionals will be recruited using snowballing techniques and through identifying key informants for this study. Diversity in the professionals' background and expertise will be considered to ensure diversity in the discourses. Participants will be required to sign an informed consent to take part in the study.

#### Inclusion and exclusion criteria

The inclusion and exclusion criteria are available in Tables 1-3.

Table 1

*Inclusion and exclusion criteria of young people who menstruate (YPM)*

| <b>Young people who menstruate (YPM)</b>             |                                               |
|------------------------------------------------------|-----------------------------------------------|
| <b>Inclusion criteria</b>                            | <b>Exclusion criteria</b>                     |
| Are between 11 and 16 years old                      | Are below 11 or above 16 years old            |
| Are attending a participating school                 | Have not (and will not) menstruate            |
| Have (or will) menstruate                            | Cannot understand and/or provide consent      |
| Have given their consent to participate              | Cannot communicate well in Catalan or Spanish |
| Parents or legal tutors have signed the consent form |                                               |
| Have a good command of Catalan or Spanish            |                                               |

Table 2

*Inclusion and exclusion criteria of young people who do not menstruate (YNM)*

| <b>Young people who do not menstruate (YNM)</b> |                                               |
|-------------------------------------------------|-----------------------------------------------|
| <b>Inclusion criteria</b>                       | <b>Exclusion criteria</b>                     |
| Are between 11 and 16 years old                 | Are below 11 or above 16 years old            |
| Are attending a participating school            | Have (or will) menstruate                     |
| Have not (and will not) menstruate              | Cannot understand and/or provide consent      |
| Have given their consent to participate         | Cannot communicate well in Catalan or Spanish |



|                                                      |  |
|------------------------------------------------------|--|
| Parents or legal tutors have signed the consent form |  |
| Have a good command of Catalan or Spanish            |  |

Table 3

*Inclusion and exclusion criteria of professionals*

| <b>Professionals</b>                                               |                                                                           |
|--------------------------------------------------------------------|---------------------------------------------------------------------------|
| <b>Inclusion criteria</b>                                          | <b>Exclusion criteria</b>                                                 |
| Have experiences working in relevant areas of/for menstrual health | Do not have experiences working in relevant areas of/for menstrual health |
| Have signed the consent form                                       | Cannot understand and/or provide consent                                  |
| Have a good command of Catalan or Spanish                          | Cannot communicate well in Catalan or Spanish                             |

**Sample size**

## Quantitative study

A total of 871 YPM will be recruited for the quantitative study in 18 schools in the Barcelona Metropolitan area. The sample size is based on power calculations considering the composite variable “period poverty” as the main variable. Maximum indetermination of the main variable (proportion of 50%) was assumed. It was also considered that there are 53,354 young girls attending schools in the Barcelona metropolitan area between 11 and 16 years old. These assumptions were in order to obtain a precision of 5%, expecting that 50 young girls of each participating school will take part in the study. Also, due to the effect of the design an interclass correlation of 0,026 [3] will required a minimum of 871 participants (and 18 schools). These estimates have been calculated assuming an alfa risk of 5%. PASS software was used for the sample size calculations [PASS 15 Power Analysis and Sample Size Software (2017). NCSS, LLC. Kaysville, Utah, USA].

## Qualitative study

Sixty-five YPM, 45 YNM and 12 professionals (health professionals, teachers, policymakers, activists, and youth representatives) will be recruited for the qualitative study. The sample size will be dependent on data saturation.

**Data analysis plan**

## Quantitative study



1  
2  
3 Descriptive statistics will be used for each variable to identify asymmetric distributions. The  
4 continuous variables will be analysed as mean (SD) or median (25<sup>th</sup> and 75<sup>th</sup> centiles) based on  
5 the normality/non-normality of the distribution, and categorical variables will be described as  
6 percentages. To evaluate differences among groups, the appropriate statistics will be applied  
7 based on the type of variable and their distribution ( $\chi^2$ , F-distribution, Student's t-distribution,  
8 analysis of variance, Mann-Whitney U and Kruskal-Wallis). To estimate the magnitude of the  
9 associations between the selected variables and period poverty, prevalence ratios and their 95%  
10 confidence intervals will be computed by general linear models (Poisson regression models with  
11 robust variance and logistics models).  
12  
13  
14  
15  
16

### 17 Qualitative study

18  
19  
20 Qualitative data will be analysed using Thematic Content Analysis[23]. Once the audio  
21 recordings are transcribed, the researchers will familiarise themselves with the data. This will lead  
22 to pre-analytical insights of the data. The next step will be to 1) identify relevant themes within  
23 the text, 2) divide the text into units of meaning, 3) coding of the data, 4) generation of categories  
24 by grouping codes, 5) analysis of each category, and 6) elaboration of new text. The results will  
25 be then discussed with the working group until consensus is reached (triangulation).  
26  
27  
28  
29  
30

### 31 **Patient and Public Involvement**

32  
33 The research questions and aims of this study were driven by community-led social movements  
34 on menstrual health and period poverty. Key agents and community members were consulted to  
35 design the study, being some of these agents part of the working group. The working group will  
36 be actively involved in all stages of the study. Together with participants, the working group will  
37 also contribute to the communication and dissemination of the findings (see Dissemination  
38 Strategy section on page 12). All materials used for this study (e.g., questionnaire and topic  
39 guides) will be designed and piloted with the target population.  
40  
41  
42  
43  
44  
45

### 46 **Ethical considerations**

47  
48 We have obtained the necessary ethical approvals prior to the start of the research from our  
49 organisation (IDIAPJGoL) [19/178-P]. We have considered a number of ethical issues. A main  
50 consideration is that this research involves the participation of individuals who are not able to  
51 give consent (minors). Child consent will be granted through representation (i.e., parents or legal  
52 tutors) according to the Spanish Law on Biomedical Research (14/2007).  
53  
54  
55  
56

57 All activities included in the study will be carried out according to existing guidance in ethics as  
58 indicated in the Universal Declaration on Bioethics and Human Rights adopted by UNESCO  
59 (19/10/2005); the Council of Europe Convention for the Protection of Human Rights and Dignity  
60

1  
2  
3 of the Human Being with regard to the Application of Biology and Medicine (1997) and its  
4 additional protocol on biomedical research (2005); the Helsinki Declaration (2013) and relevant  
5 EU laws (European Parliament and Council Directive 2001/20/EC); the Spanish Law on  
6 Biomedical Research (14/2007); and the LOPD (Spanish Law on Personal Data Protection)  
7 (3/2018).  
8  
9  
10

#### 11 Informed consent

12  
13  
14 Verbal and written informed consent will be requested from all participants prior to their  
15 participation in the study. Most participants will be minors. This has important ethical  
16 implications. All information will be given to underage participants in a comprehensive way, and  
17 study materials will be adapted to ensure readability and comprehensiveness. Parents or legal  
18 guardians will be notified of their children's invitation to the study. A signed written consent will  
19 be requested from all parents or legal guardians for all underage participants. The researchers will  
20 ensure that participants are able to consent, and that they understand what their participation  
21 entails.  
22  
23  
24  
25  
26

#### 27 Confidentiality and anonymity

28  
29  
30 Confidentiality and anonymity will be carefully ensured. Contact details will only be requested  
31 to those participants that are willing to take part in succeeding stages of the study. Physical  
32 identifiable data will be securely stored at the IDIAPJGoL in a locked cabinet. Digital information  
33 will be securely stored at the IDIAPJGoL secure portal. Only the research team will have access  
34 to the data. All data presented when disseminating the findings from this study will be  
35 anonymised. All identifiable data will be removed from transcriptions and participants will be  
36 assigned a participant code. Anonymity in the photographs used in the photo-elicitation  
37 interviews will also be ensured. The team will do this by not using photographs in which people  
38 are identifiable, unless written consent is given from identifiable people in the photographs.  
39 Anonymised data will be made available upon request to the authors.  
40  
41  
42  
43  
44  
45  
46

#### 47 Potential risks

48  
49 Taking part in this study will involve the discussion of sensitive topics (i.e., menstrual health,  
50 situations of inequity, sexual relationships, and other related topics) and involves the inclusion of  
51 a vulnerable group (minors). Discussing sensitive topics and the inclusion of minors are necessary  
52 for the purposes of this study. In order to minimise these issues, information about the nature of  
53 the study will be disclosed prior to seeking consent and before initiating the data collection. The  
54 researchers will conduct the study sensitively at all times.  
55  
56  
57  
58  
59  
60

1  
2  
3 A protocol has been prepared in case the researchers had immediate concerns of harm, or a  
4 participant gets distressed during their participation in the study. If this happened with underage  
5 participants, their school tutor and parents will be informed (with the participants' permission).  
6 Participation will be paused or stopped if a participant gets distressed. It will be the participant's  
7 decision whether they decide to continue taking part in the study. The research team will ensure  
8 that all participants are able to seek support and/or advice if needed.  
9  
10

11  
12  
13 All participants will be made aware of their right to withhold information that they are not willing  
14 to share, as well as withdrawing from the study or removing their data at any time (prior to data  
15 analyses).  
16  
17

18  
19 Participants taking part in the interviews, group discussion and World Café will receive a 10€  
20 voucher as a token of thanks for their participation. Participants will also receive a debriefing  
21 form that includes a list of resources (books, websites and Instagram accounts) to learn about  
22 menstrual health.  
23  
24

### 25 26 **Dissemination strategy**

27  
28 The findings will be disseminated to key audiences. These will be YPM, YNM, parents and legal  
29 tutors, health professionals, educators, youth (and other relevant) organisations, general  
30 community members, stakeholders and policymakers, and academia.  
31  
32

33  
34 The dissemination strategy will include a dissemination project produced by YPM and YNM,  
35 with the support of the research team. The content and format will be chosen by YPM and YNM  
36 involved in the development of this dissemination project. Examples of formats would be an art  
37 exhibition or a book.  
38  
39

40  
41 The working group will also organise meetings and workshops at "citizen science" events and  
42 schools, aimed at several key audiences. These meetings and workshops will involve study  
43 participants (YPM, YNM, and professionals) who will co-lead the sessions.  
44  
45

46  
47 The working group will prepare short reports, policy briefs, presentations and meetings with  
48 stakeholders and policymakers, activists, health professionals, educators and youth (and other  
49 relevant) organisations. The materials, presentations and meetings will be prepared in  
50 collaboration with study participants.  
51  
52

53  
54 On the other hand, scientific publications will be prepared. The study will also be presented at  
55 national and international conferences. This part of the strategy will be led by the research team,  
56 with the collaboration of the working group and study participants.  
57  
58

### 59 **REFERENCES**

60

- 1  
2  
3 1 Haque SE, Rahman M, Itsuko K, *et al.* The effect of a school-based educational  
4 intervention on menstrual health: An intervention study among adolescent girls in  
5 Bangladesh. *BMJ Open* 2014;**4**:1–9. doi:10.1136/bmjopen-2013-004607  
6  
7  
8  
9 2 Sommer M, Schmitt M, Gruer C, *et al.* Neglect of menarche and menstruation in the  
10 USA. *Lancet* 2019;**393**:2302. doi:10.1016/S0140-6736(19)30300-9  
11  
12  
13 3 Montgomery P, Hennegan J, Dolan C, *et al.* Menstruation and the Cycle of Poverty: A  
14 Cluster Quasi-Randomised Control Trial of Sanitary Pad and Puberty Education  
15 Provision in Uganda. *PLoS One*  
16 2016;**11**:e0166122.https://doi.org/10.1371/journal.pone.0166122  
17  
18  
19  
20 4 Tingle, C & Vora S. Break the Barriers : Girls ' Experiences of. *Plan Int UK* 2018;:1–  
21 68.https://plan-uk.org/file/plan-uk-break-the-barriers-report-  
22 032018pdf/download?token=Fs-HYP3v  
23  
24  
25  
26 5 Matteson KA, Zaluski KM. Menstrual Health as a Part of Preventive Health Care. *Obstet*  
27 *Gynecol Clin North Am* 2019;**46**:441–53. doi:10.1016/j.ogc.2019.04.004  
28  
29  
30 6 American College of Obstetricians & Gynecologists Committee on Adolescent Health  
31 Care. Opinion no. 651: Menstruation in girls and adolescents: using the menstrual cycle  
32 as a vital sign. *Obstet Gynecol* 2015;:e143–6.  
33  
34  
35 7 Botello Hermosa A, Casado Mejía R. Significado Cultural De La Menstruación En  
36 Mujeres Españolas. *Cienc y enfermería* 2017;**23**:89–97. doi:10.4067/s0717-  
37 95532017000300089  
38  
39  
40  
41 8 Schoep ME, Adang EMM, Maas JWM, *et al.* Productivity loss due to menstruation-  
42 related symptoms: A nationwide cross-sectional survey among 32 748 women. *BMJ*  
43 *Open* 2019;**9**:1–10. doi:10.1136/bmjopen-2018-026186  
44  
45  
46  
47 9 Valls-Llobet C. *Mujeres, salud y poder*. Madrid: : Cátedra (Feminismos) 2009.  
48  
49  
50  
51 10 Levinson R. Sexism in Medicine. *Am J Nurs* 1976;**76**:426–31. doi:10.2307/3423886  
52  
53  
54  
55 11 Schiebinger L. Skeletons in the Closet: The First Illustrations of the Female Skeleton in  
56 Eighteenth-Century Anatomy. *Representations* 1986;:42–82. doi:10.2307/2928435  
57  
58  
59 12 Martin E. The Egg and the Sperm: How Science Has Constructed a Romance Based on  
60 Stereotypical Male-Female Roles. *Signs (Chic)* 1991;**16**:485–  
501.http://www.jstor.org/stable/3174586

- 1  
2  
3 13 Young K, Fisher J, Kirkman M. Women's experiences of endometriosis: A systematic  
4 review and synthesis of qualitative research. *J Fam Plan Reprod Heal Care*  
5 2015;**41**:225–34. doi:10.1136/jfprhc-2013-100853  
6  
7  
8  
9 14 IDESCAT. Encuesta de condiciones de vida 2017.  
10 2018. <https://www.idescat.cat/novetats/?id=2991&lang=es>  
11  
12  
13 15 Owen R, Macnaghten P, Stilgoe J. Responsible research and innovation: From science in  
14 society to science for society, with society. *Sci Public Policy* 2012;**39**:751–60.  
15 doi:10.1093/scipol/scs093  
16  
17  
18 16 Ussher JM. *The Madness of Women*. New York: : Routledge 2011.  
19  
20  
21 17 Butler J. *Gender Trouble*. New York: : Routledge 2007.  
22  
23 18 Kastoryano R. Multiculturalism and interculturalism: redefining nationhood and  
24 solidarity. *Comp Migr Stud* 2018;**6**. doi:10.1186/s40878-018-0082-6  
25  
26  
27 19 Fleckman JM, Dal Corso M, Ramirez S, *et al*. Intercultural Competency in Public  
28 Health: A Call for Action to Incorporate Training into Public Health Education. *Front*  
29 *public Heal* 2015;**3**:210. doi:10.3389/fpubh.2015.00210  
30  
31  
32 20 Zapata-Barrero R. Interculturalism in the post-multicultural debate: a defence. *Comp*  
33 *Migr Stud* 2017;**5**:14. doi:10.1186/s40878-017-0057-z  
34  
35  
36 21 Domínguez-Berjón, M. F. Borrell C, Cano-Serral G, Esnaola S, *et al*. Construcción de un  
37 índice de privación a partir de datos censales en grandes ciudades españolas (Proyecto  
38 MEDEA). *Gac Sanit* 2008;**22**:179–87.  
39  
40  
41  
42 22 Minkler M, Wallerstein N. *Community based participatory research for health: Process*  
43 *to outcomes*. 2nd ed. San Francisco: : Jossey Bass 2008.  
44  
45  
46 23 Berenguera A, Fernández de Sanmamed MJ, Pons M, *et al*. *To Listen, To Observe and*  
47 *To Understand. Bringing Back Narrative into the Health Sciences. Contributions of*  
48 *Qualitative Research*. Barcelona: : Institut Universitari d'Investigació en Atenció  
49 Primària Jordi Gol (IDIAPJGol) 2017.  
50  
51  
52  
53 24 Boynton PM, Greenhalgh T. Hands-on guide to questionnaire research: Selecting,  
54 designing, and developing your questionnaire. *Br Med J* 2004;**328**:1312–5.  
55 doi:10.1136/bmj.328.7451.1312  
56  
57  
58

## 59 AUTHORS' CONTRIBUTIONS

1  
2  
3 LMP has led and coordinated the conception and design of this study. She has written this  
4 manuscript. ABO has been involved in the conception and design in this study. She has reviewed  
5 and made substantial contributions to this manuscript. TLJ has contributed to the design of the  
6 quantitative study, performed power calculations and written the plan for the quantitative data  
7 analyses. He has reviewed and made substantial contributions to this manuscript. CJA, CVL,  
8 RTV, DP, LH, PBC, ESL and JMF have contributed to the design of this study. She has reviewed  
9 and made substantial contributions to this manuscript.  
10  
11  
12  
13

#### 14 15 **FUNDING STATEMENT**

16  
17 This work was supported by The European Society of Contraception and Reproductive Health,  
18 project number P-2019-A-01.  
19  
20

#### 21 **COMPETING INTEREST STATEMENT**

22  
23 The authors declare no conflict of interest.  
24  
25

#### 26 **ACKNOWLEDGEMENTS**

27  
28 We would like to thank all women (and men) from the community who contributed to the ideas  
29 captured in this protocol. We would like to specially thank Carmen Revuelta Lisa, Ramona  
30 Ortiz López and Mònica Isido Albaladejo for their contributions to elaborating the materials and  
31 setting up recruitment and data collection.  
32  
33  
34  
35

#### 36 **FIGURE LEGEND**

37  
38 Figure 1. Gantt Chart.  
39  
40  
41  
42  
43  
44  
45  
46  
47  
48  
49  
50  
51  
52  
53  
54  
55  
56  
57  
58  
59  
60

FIGURE

| STUDY PHASES                    | TASKS                                                              | TEAM                        | Year 1 |   |   |   |   |   |   |   |   |    |    |    | Year 2 |   |   |   |   |   |   |   |   |    |    |    |
|---------------------------------|--------------------------------------------------------------------|-----------------------------|--------|---|---|---|---|---|---|---|---|----|----|----|--------|---|---|---|---|---|---|---|---|----|----|----|
|                                 |                                                                    |                             | Months |   |   |   |   |   |   |   |   |    |    |    | Months |   |   |   |   |   |   |   |   |    |    |    |
|                                 |                                                                    |                             | 1      | 2 | 3 | 4 | 5 | 6 | 7 | 8 | 9 | 10 | 11 | 12 | 1      | 2 | 3 | 4 | 5 | 6 | 7 | 8 | 9 | 10 | 11 | 12 |
| Transversal                     | Meetings research group                                            | Research team               | ■      | ■ | ■ | ■ | ■ | ■ | ■ | ■ | ■ | ■  | ■  | ■  | ■      | ■ | ■ | ■ | ■ | ■ | ■ | ■ | ■ | ■  |    |    |
|                                 | Meetings working group                                             | Working group               |        |   |   |   |   |   |   |   |   |    |    |    |        |   |   |   |   |   |   |   |   |    |    |    |
| Study preparation               | Ethical approvals                                                  | Research team               | ■      |   |   |   |   |   |   |   |   |    |    |    |        |   |   |   |   |   |   |   |   |    |    |    |
|                                 | Creation of working group                                          | Research team               | ■      |   |   |   |   |   |   |   |   |    |    |    |        |   |   |   |   |   |   |   |   |    |    |    |
|                                 | Development of study protocol                                      | Working group               | ■      |   |   |   |   |   |   |   |   |    |    |    |        |   |   |   |   |   |   |   |   |    |    |    |
|                                 | Development of study materials                                     | Working group               | ■      | ■ |   |   |   |   |   |   |   |    |    |    |        |   |   |   |   |   |   |   |   |    |    |    |
|                                 | Establish contacts for recruitment                                 | Working group               |        | ■ | ■ | ■ |   |   |   |   |   |    |    |    |        |   |   |   |   |   |   |   |   |    |    |    |
| Recruitment and data collection | Recruitment schools                                                | Working group               |        |   |   |   | ■ |   |   |   |   |    |    |    |        |   |   |   |   |   |   |   |   |    |    |    |
|                                 | Recruitment participants                                           | Research team               |        |   |   |   | ■ |   |   |   |   |    |    |    |        |   |   |   |   |   |   |   |   |    |    |    |
|                                 | Completion of questionnaires                                       | Research team               |        |   |   |   | ■ | ■ |   |   |   |    |    |    |        |   |   |   |   |   |   |   |   |    |    |    |
|                                 | Individual interviews                                              | Research team               |        |   |   |   |   | ■ | ■ |   |   |    |    |    |        |   |   |   |   |   |   |   |   |    |    |    |
|                                 | Group discussions                                                  | Research team               |        |   |   |   |   |   |   | ■ | ■ |    |    |    |        |   |   |   |   |   |   |   |   |    |    |    |
|                                 | World Café                                                         | Research team               |        |   |   |   |   |   |   |   |   | ■  |    |    |        |   |   |   |   |   |   |   |   |    |    |    |
| Data analyses                   | Transcribing                                                       | Research team; transcriber  |        |   |   |   |   | ■ | ■ | ■ | ■ | ■  |    |    |        |   |   |   |   |   |   |   |   |    |    |    |
|                                 | Quantitative analyses                                              | Research team               |        |   |   |   |   | ■ | ■ | ■ | ■ | ■  |    |    |        |   |   |   |   |   |   |   |   |    |    |    |
|                                 | Qualitative analyses                                               | Research team               |        |   |   |   |   |   |   |   |   |    | ■  | ■  | ■      |   |   |   |   |   |   |   |   |    |    |    |
|                                 | Discussion of results                                              | Working group               |        |   |   |   |   |   | ■ | ■ | ■ | ■  | ■  | ■  | ■      |   |   |   |   |   |   |   |   |    |    |    |
| Dissemination                   | Dissemination project                                              | Participants; working group |        |   |   |   |   |   |   |   |   |    |    |    |        |   | ■ | ■ | ■ | ■ | ■ | ■ | ■ | ■  |    |    |
|                                 | Dissemination of final product                                     | Participants; working group |        |   |   |   |   |   |   |   |   |    |    |    |        |   |   |   |   | ■ | ■ | ■ | ■ | ■  |    |    |
|                                 | Dissemination of results                                           | Working group               | ■      | ■ | ■ | ■ | ■ | ■ | ■ | ■ | ■ | ■  | ■  | ■  | ■      | ■ | ■ | ■ | ■ | ■ | ■ | ■ | ■ | ■  |    |    |
|                                 | Publication 1 (study protocol)                                     | Working group               | ■      | ■ | ■ | ■ | ■ | ■ | ■ | ■ | ■ | ■  | ■  | ■  | ■      | ■ | ■ | ■ | ■ | ■ | ■ | ■ | ■ | ■  |    |    |
|                                 | Publication 2 (quantitative data)                                  | Working group               |        |   |   |   |   |   |   |   | ■ | ■  | ■  | ■  | ■      |   |   |   |   |   |   |   |   |    |    |    |
|                                 | Publication 3 (qualitative data; interviews and group discussions) | Working group               |        |   |   |   |   |   |   |   |   |    |    |    |        |   | ■ | ■ | ■ | ■ | ■ | ■ | ■ | ■  |    |    |
|                                 | Publication 4 (qualitative data; world café)                       | Working group               |        |   |   |   |   |   |   |   |   |    |    |    |        |   |   |   | ■ | ■ | ■ | ■ | ■ | ■  |    |    |
| Evaluation and impact           | Impact evaluation                                                  | Working group               |        |   |   |   |   |   | ■ |   |   |    |    |    |        |   |   |   |   |   | ■ |   |   | ■  |    |    |

Figure 1. Gantt Chart

## MENSTRUAL HEALTH QUESTIONNAIRE

**You will need to complete all questions if you have menstruated already. Please complete questions 1 to 16 if you have not had the menstruation yet.**

Your answers are anonymous so nobody will be able to associate your answers with you. It is very important for you to know that there are no right or wrong answers, they are all welcome!

Date: \_\_\_\_\_

**Indicate with an X or write your answer the following questions**

1. How old are you? \_\_\_\_\_
2. What city do you live in? \_\_\_\_\_
3. What is the name of your school? \_\_\_\_\_
4. What are you studying? \_\_\_\_\_
5. What country were you born in? \_\_\_\_\_
6. What countries were your parents born in? *You do not need to answer if you do not know.*
  - My mum was born in \_\_\_\_\_
  - My dad was born in \_\_\_\_\_
8. Do you feel part of any of these communities? *Tick all options that are true for you*

|                                 |                                     |
|---------------------------------|-------------------------------------|
| <input type="radio"/> Gipsy     | <input type="radio"/> Buddhist      |
| <input type="radio"/> Christian | <input type="radio"/> Jewish        |
| <input type="radio"/> Catholic  | <input type="radio"/> Other _____   |
| <input type="radio"/> Islamic   | <input type="radio"/> None of these |
| <input type="radio"/> Hinduist  | <input type="radio"/> I don't know  |
9. Have you ever had the menstruation?
  - Yes
  - No
  - I don't know



- 1  
2  
3  
4  
5  
6  
7  
8  
9  
10  
11  
12  
13  
14  
15  
16  
17  
18  
19  
20  
21  
22  
23  
24  
25  
26  
27  
28  
29  
30  
31  
32  
33  
34  
35  
36  
37  
38  
39  
40  
41  
42  
43  
44  
45  
46  
47  
48  
49  
50  
51  
52  
53  
54  
55  
56  
57  
58  
59  
60
10. Do you think menstrual pain is “normal”?
- Yes, it always hurts
  - Yes, it hurts sometimes
  - No, it shouldn't hurt too much
  - No, it doesn't hurt
  - I don't know
11. Where have you learnt about the menstruation? *Tick all options that are true for you*
- Family
  - School
  - Friends
  - Internet
  - Social networks (e.g. Instagram)
  - TV
  - Magazines or books
  - Other \_\_\_\_\_
  - I don't know
12. Would you like to have more information about the menstruation? *Tick all options that are true for you*
- Yes, on what the menstruation is
  - Yes, on the duration of the menstruation
  - Yes, on how the menstruation can have an impact on my daily life
  - Yes, on menstruation delays
  - Yes, on menstrual products
  - Yes, on something else: \_\_\_\_\_
  - No, I have enough
  - No, I am not interested
  - I don't know
13. Are you embarrassed to talk about the menstruation?
- Yes
  - No
  - I don't know
14. What is the menstruation? *Tick all the options that you think are correct.*
- Blood that comes out of the vagina
  - People have them every 3 weeks
  - It is common to have it over 10 days or more
  - Women have the menstruation all their life
  - It has something to do with the menstrual cycle
  - I don't know

- 1  
2  
3  
4  
5  
6  
7  
8  
9  
10  
11  
12  
13  
14  
15  
16  
17  
18  
19  
20  
21  
22  
23  
24  
25  
26  
27  
28
15. What menstrual products do you know of (even if you have not used them)?
- Tampons
  - Single-use pads
  - Cloth menstrual pads (you need to wash and re-use)
  - Menstrual cup
  - Menstrual underwear (menstrual-proof underwear that you need to wash and re-use)
  - Menstrual sponges
  - Other: \_\_\_\_\_
  - I don't know
16. What is the menstrual cycle? *Tick all the options that you think are correct.*
- It has 3 phases
  - It has something to do with the hormones
  - There are no changes in the body during the menstrual cycle
  - It has something to do with ovulation
  - I don't know

29  
30  
31  
32  
33

**IF YOU HAVEN'T HAD THE MENSTRUATION, YOU HAVE FINISHED!**

**Thank you very much for participating!**

34  
35  
36  
37  
38  
39

**PLEASE, CONTINUE ANSWERING IF YOU HAVE HAD THE MENSTRUATION** 

- 40  
41  
42  
43  
44  
45  
46  
47  
48  
49  
50  
51  
52  
53  
54  
55  
56  
57  
58  
59  
60
17. How old were you when you had the menstruation for the first time? \_\_\_\_\_
18. Do you have menstrual pain?
- Yes, always
  - Yes, sometimes
  - Very few times
  - No, never
  - I don't know
19. What do you do when you have menstrual pain? *Tick all the things that you do.*
- I take painkillers (e.g. Ibuprofen, paracetamol...)
  - I take hormonal contraceptives every day for menstrual pain
  - I use natural remedies
  - I cannot buy products for menstrual pain
  - I don't do anything
  - I do something else: \_\_\_\_\_
  - I don't have menstrual pain
  - I don't know

- 1  
2  
3  
4  
5  
6  
7  
8  
9  
10  
11  
12  
13  
14  
15  
16  
17  
18  
19  
20  
21  
22  
23  
24  
25  
26  
27  
28  
29  
30  
31  
32  
33  
34  
35  
36  
37  
38  
39  
40  
41  
42  
43  
44  
45  
46  
47  
48  
49  
50  
51  
52  
53  
54  
55  
56  
57  
58  
59  
60
20. Have you every spoken to someone about menstrual pain?
- Yes, with \_\_\_\_\_ (*e.g., my mother*)
  - No, with anyone
  - I don't know
21. Do you stop going to school when you have the menstruation?
- Yes, always
  - Very few times
  - I don't know
  - Yes, sometimes
  - No, never
22. Do you stop exercising or going to physical education when you have the menstruation?
- Yes, always
  - Very few times
  - I don't know
  - Yes, sometimes
  - No, never
23. Do you stop doing activities such as going to the pool or to the beach when you have the menstruation?
- Yes, always
  - Very few times
  - I don't know
  - Yes, sometimes
  - No, never
24. Do you miss any plans with your friends when you have the menstruation?
- Yes, always
  - Very few times
  - I don't know
  - Yes, sometimes
  - No, never
25. Do you have trouble concentrating at school when you have the menstruation?
- Yes, always
  - Very few times
  - I don't know
  - Yes, sometimes
  - No, never
23. Do you feel less capable of doing an exam or evaluated activity when you have the menstruation?
- Yes, always
  - Very few times
  - I don't know
  - Yes, sometimes
  - No, never
24. Did you know what the menstruation was before having it for the first time?
- Yes
  - No
  - I don't know
25. Did you feel ready to have the menstruation when you had it for the first time?
- Yes
  - No
  - I don't know

26. How do you usually feel when you have the menstruation? Tick all options that are true for you.

- Happy                                       Embarrassed                                       Other: \_\_\_\_\_  
 Sad                                                       Relaxed  
 Dirty                                                       Tired                                                       I don't know  
 Angry                                                       Sensitive

27. Are you scared of staining your clothes with blood when you have the menstruation?

- Yes  
 No  
 I don't know

28. How often have you made an excuse not to say that you were menstruating?

- Always                                                       Very few times                                                       I don't know  
 Sometimes                                                       Never

29. Has anyone ever made fun of you for having the menstruation?

- Yes  
 No  
 I don't know

30. Have you ever seen someone making fun of someone else for having the menstruation?

- Yes  
 No  
 I don't know

31. Are you embarrassed of buying or asking for menstrual products?

- Yes, always                                                       No, never  
 Yes, sometimes                                                       I don't know  
 Very few times                                                       Someone else buys them for me

32. What menstrual products do you use? Tick all the products that you use.

- Tampons                                                       I wear more than one piece of underwear  
 Single-use pads                                                       Nappies  
 Cloth menstrual pads                                                       I don't use anything (free bleeding)  
 Menstrual cup                                                       Other: \_\_\_\_\_  
 Toilet paper                                                       I don't know  
 Menstrual underwear  
 Menstrual sponge

33. Do you think menstrual products are too expensive?

- Yes  
 No  
 I don't know

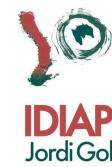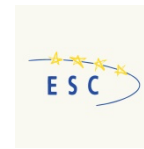

- 1  
2  
3  
4  
5  
6  
7  
8  
9  
10  
11  
12  
13  
14  
15  
16  
17  
18  
19  
20  
21  
22  
23  
24  
25  
26  
27  
28  
29  
30  
31  
32  
33  
34  
35  
36  
37  
38  
39  
40  
41  
42  
43  
44  
45  
46  
47  
48  
49  
50  
51  
52  
53  
54  
55  
56  
57  
58  
59  
60
34. Have you ever lacked any money to buy menstrual products?
- Yes, always
  - Very few times
  - I don't know
  - Yes, sometimes
  - No, never
35. Have you ever had to use menstrual products that you don't like because the ones you like are too expensive?
- Yes, always
  - Very few times
  - I don't know
  - Yes, sometimes
  - No, never
36. Can you ask for menstrual products for free in your school?
- Yes
  - No
  - I don't know
37. Do you feel comfortable to ask for menstrual products in the following places? *Tick all options that are true for you.*
- School
  - Sports club
  - Youth centre
  - No, I don't feel comfortable
38. Have you ever gone to a health centre or pharmacy to ask about the menstruation?
- Yes
  - No, but I would like to go
  - No, but I would not like to go
  - I don't know
39. Have you ever used menstrual products for longer than it is recommended because you did not have a replacement?
- Yes, always
  - Very few times
  - I don't know
  - Yes, sometimes
  - No, never
40. Have you ever used menstrual products for longer than it is recommended because you do could not find appropriate facilities to (e.g., individual bathroom, soap to wash your hands, clean bathroom,...)?
- Yes, always
  - Very few times
  - I don't know
  - Yes, sometimes
  - No, never
41. In the last 6 months, have you had any of these symptoms?
- Genital rash
  - I haven't had any of these symptoms
  - Vaginal irritation
  - Other symptoms: \_\_\_\_\_
  - Genital redness or inflammation
  - Unusual vaginal discharge (colour/odour)
  - I don't know

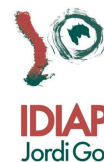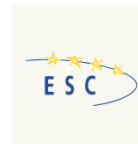

42. If you have had symptoms, have you spoken about it with anyone?

- Yes, with \_\_\_\_\_
- No
- I don't know
- I haven't had any symptoms

43. If you have had symptoms, have you received any treatment?

- Yes, at \_\_\_\_\_ (e.g., health centre)
- No
- I don't know
- I haven't had any symptoms

**Would you like to add anything about the menstruation?**

**Let us know here:**

---



---



---



---

**THANK YOU VERY MUCH FOR YOUR PARTICIPATION!**

For peer review only

# BMJ Open

## Menstrual health and period poverty among young people who menstruate in the Barcelona metropolitan area (Spain): protocol of a mixed-methods study.

|                                 |                                                                                                                                                                                                                                                                                                                                                                                                                                                                                                                                                                                                                                                                                                                                                                                                                                                                                                                  |
|---------------------------------|------------------------------------------------------------------------------------------------------------------------------------------------------------------------------------------------------------------------------------------------------------------------------------------------------------------------------------------------------------------------------------------------------------------------------------------------------------------------------------------------------------------------------------------------------------------------------------------------------------------------------------------------------------------------------------------------------------------------------------------------------------------------------------------------------------------------------------------------------------------------------------------------------------------|
| Journal:                        | <i>BMJ Open</i>                                                                                                                                                                                                                                                                                                                                                                                                                                                                                                                                                                                                                                                                                                                                                                                                                                                                                                  |
| Manuscript ID                   | bmjopen-2019-035914.R2                                                                                                                                                                                                                                                                                                                                                                                                                                                                                                                                                                                                                                                                                                                                                                                                                                                                                           |
| Article Type:                   | Protocol                                                                                                                                                                                                                                                                                                                                                                                                                                                                                                                                                                                                                                                                                                                                                                                                                                                                                                         |
| Date Submitted by the Author:   | 24-Apr-2020                                                                                                                                                                                                                                                                                                                                                                                                                                                                                                                                                                                                                                                                                                                                                                                                                                                                                                      |
| Complete List of Authors:       | Medina-Perucha, Laura; IDIAP Jordi Gol, Jacques-Aviñó, Constanza; IDIAP Jordi Gol; Universitat Autònoma de Barcelona<br>Valls-Llobet, Carme; Centro de Análisis y Programas Sanitarios (CAPS) Turbau-Valls, Rosa; Institut Català de la Salut<br>Pinzón, Diana; SomiArte Taller; Universitat Autònoma de Barcelona<br>Hernández, Lola; La Caravana Roja<br>Briales Canseco, Paula; Comunidad de Madrid Consejería de Educación<br>López-Jiménez, Tomàs; Institut de Recerca en Atenció Primària Jordi Gol, Unitat Central de Recerca<br>Solana Lizarza, Enara; Universidad Internacional de la Rioja - Campus de Logrono, Department of Education<br>Munrós Feliu, Jordina; Institut Català de la Salut, Atenció a la Salut Sexual i Reproductiva (ASSIR) Muntanya/La Mina<br>Berenguera, Anna; Institut Universitari d'Investigació en Atenció Primària (IDIAP-Jordi Gol), ; Universitat Autònoma de Barcelona, |
| <b>Primary Subject Heading</b>: | Obstetrics and gynaecology                                                                                                                                                                                                                                                                                                                                                                                                                                                                                                                                                                                                                                                                                                                                                                                                                                                                                       |
| Secondary Subject Heading:      | Public health                                                                                                                                                                                                                                                                                                                                                                                                                                                                                                                                                                                                                                                                                                                                                                                                                                                                                                    |
| Keywords:                       | Menstrual health, Health services, Education, Young people, SOCIAL MEDICINE, PUBLIC HEALTH                                                                                                                                                                                                                                                                                                                                                                                                                                                                                                                                                                                                                                                                                                                                                                                                                       |
|                                 |                                                                                                                                                                                                                                                                                                                                                                                                                                                                                                                                                                                                                                                                                                                                                                                                                                                                                                                  |

SCHOLARONE™  
Manuscripts



I, the Submitting Author has the right to grant and does grant on behalf of all authors of the Work (as defined in the below author licence), an exclusive licence and/or a non-exclusive licence for contributions from authors who are: i) UK Crown employees; ii) where BMJ has agreed a CC-BY licence shall apply, and/or iii) in accordance with the terms applicable for US Federal Government officers or employees acting as part of their official duties; on a worldwide, perpetual, irrevocable, royalty-free basis to BMJ Publishing Group Ltd ("BMJ") its licensees and where the relevant Journal is co-owned by BMJ to the co-owners of the Journal, to publish the Work in this journal and any other BMJ products and to exploit all rights, as set out in our [licence](#).

The Submitting Author accepts and understands that any supply made under these terms is made by BMJ to the Submitting Author unless you are acting as an employee on behalf of your employer or a postgraduate student of an affiliated institution which is paying any applicable article publishing charge ("APC") for Open Access articles. Where the Submitting Author wishes to make the Work available on an Open Access basis (and intends to pay the relevant APC), the terms of reuse of such Open Access shall be governed by a Creative Commons licence – details of these licences and which [Creative Commons](#) licence will apply to this Work are set out in our licence referred to above.

Other than as permitted in any relevant BMJ Author's Self Archiving Policies, I confirm this Work has not been accepted for publication elsewhere, is not being considered for publication elsewhere and does not duplicate material already published. I confirm all authors consent to publication of this Work and authorise the granting of this licence.



1  
2  
3 **Menstrual health and period poverty among young people who menstruate in the**  
4 **Barcelona metropolitan area (Spain): protocol of a mixed-methods study.**  
5

6  
7 Medina-Perucha, L.<sup>1</sup>, Jacques-Aviñó, C.<sup>1,2,3</sup>, Valls-Llobet, C.<sup>4</sup>, Turbau-Valls, R.<sup>5</sup>, Pinzón, D.<sup>2,6</sup>,  
8 Hernández, L.<sup>7</sup>, Briales Canseco, P.<sup>8</sup>, López-Jiménez, T.<sup>1,2</sup>, Solana Lizarza, E.<sup>9</sup>, Munrós Feliu,  
9 J.<sup>10</sup>, Berenguera, A.<sup>1,2,11</sup>  
10  
11

12 <sup>1</sup> Fundació Institut Universitari per a la recerca a l'Atenció Primària de Salut Jordi Gol i Gurina  
13 (IDIAPJGol), Barcelona, Spain.  
14  
15

16 <sup>2</sup> Universitat Autònoma de Barcelona, Bellaterra (Cerdanyola del Vallès), Spain.  
17  
18

19 <sup>3</sup> Medical Anthropological Research Center (MARC-URV), Tarragona,  
20 Spain.  
21

22 <sup>4</sup> Centro de Análisis y Programas Sanitarios (CAPS), Barcelona, Spain.  
23  
24

25 <sup>5</sup> Institut Català de la Salut (ICS), Barcelona, Spain.  
26  
27

28 <sup>6</sup> SomiArte Taller, Barcelona, Spain.  
29  
30

31 <sup>7</sup> La Caravana Roja, Murcia, Spain.  
32  
33

34 <sup>8</sup> Consejería de Educación, Comunidad de Madrid, Madrid, Spain.  
35  
36

37 <sup>9</sup> Universidad Internacional de La Rioja, Department of Education, Logroño, Spain  
38  
39

40 <sup>10</sup> Atenció a la Salut Sexual i Reproductiva (ASSIR) Muntanya/La Mina. Institut Català de la  
41 Salut (ICS), Barcelona, Spain.  
42  
43

44 <sup>11</sup> Departament d'Infermeria, Universitat de Girona, Girona, Spain  
45  
46  
47

48 **Corresponding author**  
49

50 Dr Laura Medina-Perucha  
51

52 Fundació Institut Universitari per a la recerca a l'Atenció Primària de Salut Jordi Gol i Gurina  
53 (IDIAPJGol)  
54

55 Gran Via de les Corts Catalanes, 591, attic  
56

57 08007 Barcelona (Spain)  
58

59 lmedina@idiapjgol.info  
60

(0034) 93 482 46 17

1  
2  
3  
4  
5 **Word count:** 3,973.

6 **ABSTRACT**

7  
8 **Introduction.** The importance of menstrual health has been historically neglected, mostly due to  
9 taboos and misconceptions around menstruation and androcentrism within health knowledge and  
10 health systems around the world. There has also been a lack of attention on “period poverty”,  
11 which refers to the financial, social, cultural and political barriers to access menstrual products  
12 and education. The main aim of this research is to explore menstrual health and experiences of  
13 period poverty among young people who menstruate (YPM). **Methods and analysis.** This is a  
14 convergent mixed-methods study which will combine a quantitative transversal study to identify  
15 the prevalence of period poverty among YPM (11-16 years old), and a qualitative study that will  
16 focus on exploring menstruation-related experiences of YPM and other groups (young people  
17 who do not menstruate (YNM); primary healthcare professionals; educators; and policymakers).  
18 The study will be conducted in the Barcelona metropolitan area between 2020 and 2021. Eighteen  
19 schools and 871 YPM will be recruited for the quantitative study. Sixty-five YPM will participate  
20 in the qualitative study. Forty-five YNM and 12 professionals will also be recruited to take part  
21 in the qualitative study. Socioeconomic and cultural diversity will be main vectors for recruitment,  
22 to ensure the findings are representative to the social and cultural context. Descriptive statistics  
23 will be performed for each variable to identify asymmetric distributions and it will be evaluated  
24 differences among groups. Thematic analysis will be used for qualitative data analyses. **Ethics**  
25 **and dissemination.** Several ethical issues have been considered, especially as this study includes  
26 the participation of underage participants. The study has received ethical approval by the  
27 IDIAPJGol Research Ethics Committee [19/178-P]. Research findings will be disseminated to  
28 key audiences, such as YPM, YNM, parents/legal tutors, health professionals, educators, youth  
29 (and other relevant) organisations, general community members, stakeholders and policymakers,  
30 and academia.

31  
32  
33  
34  
35  
36  
37  
38  
39  
40  
41  
42  
43  
44  
45 **STRENGTHS AND LIMITATIONS OF THIS STUDY**

- 46  
47  
48  
49  
50  
51  
52  
53  
54  
55  
56  
57  
58  
59  
60
- This study will address an important research gap on menstrual health and period poverty in high-income settings, from a gender and intercultural approach.
  - A mixed-methods design will allow for the integration of quantitative (descriptive) and qualitative (in-depth) data.
  - This study includes collaborations with a variety of key actors, following Responsible and Research Innovation (RRI) guidelines.
  - The dissemination strategy includes a variety of audiences and will be co-created with study participants.

- The combination of data collection methods, and using a RRI and participatory research approach will require increased resources and time.

## KEYWORDS

Menstrual health; period poverty; health services; education; young people

## INTRODUCTION

Research on menstrual health is still scarce. Moreover, most research has been conducted in low-income countries[1–3], neglecting its need in high-income regions. Menstrual health is associated with the access of people who menstruate to accurate information on menstruation, menstrual products and clean and safe wash facilities. Menstrual health also needs to be understood as a tool for health promotion, and it is linked to experiences related to the menstrual cycle. Good menstrual health also includes tackling menstruation-related taboos, stigma and discrimination[4]. Promoting menstrual health is key to reach gender equity and promote health among people who menstruate. Menstrual health has even been suggested as a vital sign[5,6]. Despite the growing international commitment to focus on promoting menstrual health, there is still much to be done[2]. In this study, we will focus on “people who menstruate” rather than “women” not to exclude people who have a menstrual cycle but are not women/do not identify as women (e.g., male transsexual or male transgender).

Activist-led movements have increased awareness on the negative impact that the cost of menstrual products, socio-cultural practices and views on menstruation have on women’s health and wellbeing. These movements aim at promoting a “menstrual culture” that demystifies the menstrual cycle and are based on feminist and socio-cultural paradigms. Together with some health professionals, activism in Spain is already suggesting body awareness and knowledge about one’s menstrual cycle as tools for health promotion. Menstrual health education is crucial to understand and improve how people who menstruate relate to their menstrual cycle[4,7]. The role of the “menstrual products” and pharmaceutical industries in women’s menstrual health is however strong. It is precisely these companies the ones often delivering menstrual health education in schools in Spain. Considering these events enough for “menstrual health education” is questionable, as these companies rather focus on selling their products and medicalising menstruation instead of delivering high quality education on the menstrual cycle and the wide range of products available[8]. In the meantime, many people who menstruate in Spain seem to still be unaware of how their menstrual cycle works and the relationship with their overall health[8].

1  
2  
3 Focusing on young people is crucial to understand their conceptions and experiences of menarche  
4 (first menstruation). Good health education among young people is a priority as their bodies are  
5 changing as reaching adulthood. As previously reported in a study by Plan International UK[4],  
6 it is essential that young people get access to menstrual health education, health services and  
7 products that protect their health and wellbeing. In this study, menstrual-related myths and taboos  
8 were prevalent among young people. Stigma and embarrassment were a reality for many girls as,  
9 for example, most of them did not feel comfortable discussing menstruation with their school  
10 teachers. Besides and very importantly, most girls explained how they were unaware of what was  
11 happening in their bodies and what to do when they first got their menstruation[4]. Another reason  
12 to focus on children and adolescents is that they are vulnerable groups to experiencing stigma,  
13 discrimination, and social and health inequities.  
14  
15

16  
17  
18  
19  
20  
21 Inequities between people who menstruate and people who do not menstruate are also to be  
22 highlighted. These are for example visible through the (still prevailing) stigma and discrimination  
23 towards people who menstruate and menstruation itself[4]. In line with this, productivity loss due  
24 to presentism and absenteeism at schools and workplaces among people who experience  
25 menstrual pain needs to be considered too[9]. Apart from the social and financial impacts of  
26 productivity loss, social and health inequities among people who menstruate (compared to people  
27 who do not menstruate) can be also explained when menstruating is a source of social (e.g.,  
28 normalisation of menstrual pain) and structural (e.g., not being able to get sick leave for menstrual  
29 pain) sanctions.  
30  
31  
32  
33  
34  
35

36  
37  
38 The menstrual cycle is not a health condition to be medicalised. However, this is not how it seems  
39 to be conceived within society and healthcare systems. This project stems from an opposition to  
40 the predominant androcentrism in health science and healthcare systems. The concept of  
41 androcentrism refers to having men (male humans) as the reference, the norm and the example  
42 for all humans. In the health context this has translated into the invisibilisation of women, the  
43 female body and women's health in health science, policy and practice[8,10–12]. As briefly  
44 mentioned already, this project also questions the role of the industry (menstrual products and  
45 pharmaceutical) in the medicalisation and socio-cultural conceptualisations of the menstrual cycle  
46 and menstruation[8]. Instead, it is important that the menstrual cycle is understood as a natural  
47 process that is associated with good health. This means that educating society and professionals  
48 is a priority to promote health among young people who menstruate (YPM). Increased education  
49 and a more positive conceptualisation of the menstrual cycle and menstruation could help YPM  
50 being more aware of their bodies. In turn, this could help encourage menstruators to care for their  
51 menstrual and general health, and aid the identification of some health conditions such as  
52 endometriosis[13]. Improved education could also lead the disassociation of menstruation and  
53 pain, and challenge myths and beliefs around the menstrual cycle and the use of hormonal  
54  
55  
56  
57  
58  
59  
60

1  
2  
3 contraception. Last but not least, education could reduce menstruation-related stigma and  
4  
5 discrimination.

6  
7 One aspect of menstrual health is the access to menstrual products. Research in other countries,  
8  
9 such as Uganda[3] and the United Kingdom[4] has highlighted experiences of *period poverty*  
10 among young women. This term refers to barriers (financial, social, cultural and political) in  
11 accessing menstrual products, menstrual education and access to healthcare services. Plan  
12 International UK[4] recently explored period poverty in a high-income country through focus  
13 groups with 64 adolescents. Their report revealed that 1 in 10 adolescents experience period  
14 poverty in the United Kingdom. However, and to our knowledge, there have been no attempts to  
15 identify the prevalence of period poverty at a community or population level.  
16  
17  
18  
19

20  
21 Despite social movements to promote menstrual health and to reduce menstrual products' taxes  
22 in the last few years, menstrual health in Spain continues to be ignored. This is reflected in  
23 national and regional public health strategies, in which menstrual health is never present. Even if  
24 27,7% of children were at risk of poverty in Catalunya in 2017[14], experiences of period poverty  
25 among children and adolescents have not been explored. Social, cultural, financial and political  
26 barriers to promote menstrual health, tackle stigma and discrimination and eliminate period  
27 poverty have also been overlooked. Besides, menstrual products are not considered necessity  
28 goods by law in Spain, holding a 10% tax (Spanish Law 37/1992, 28<sup>th</sup> December 2018). Despite  
29 in October 2018 the Spanish government guaranteed that tax retentions on menstrual products  
30 should be reduced to 4%, this tax reduction has not yet been applied.  
31  
32  
33  
34  
35  
36

37  
38 This study will explore menstrual health and experiences of period poverty among YPM. We also  
39 hope to identify barriers and facilitators that could promote menstrual health through the access  
40 of good-quality education and healthcare. Also, to explore ways to improve menstrual health  
41 experiences in YPM and reduce period poverty. This study will provide recommendations for  
42 future research, policy and practice, aiming at addressing social inequities of health in YPM (and  
43 especially amongst those that may be experiencing period poverty) in Spain and other high-  
44 income countries with similar sociocultural contexts. The views of young people who do not  
45 menstruate and professionals will also be considered in this project. Through this research, our  
46 team aims to start a line of research on menstrual health and period poverty in the area of  
47 Barcelona, hoping to scale up the study to other areas in Spain.  
48  
49  
50  
51  
52  
53

#### 54 **AIMS AND OBJECTIVES**

55  
56 This project aims to explore menstrual health and experiences of period poverty among young  
57 people who menstruate (YPM) (11-16 years old). The study will be conducted in the Barcelona  
58 metropolitan area between 2019 and 2021.  
59  
60

The objectives will be:

1. To identify the prevalence of period poverty in YPM.
2. To explore socio-cultural understandings of menstruation and menstrual health in YPM, young people who do not menstruate (YNM) of the same age, health professionals, teachers, activists and policymakers.
3. To explore experiences of menstruation and period poverty among YPM.
4. To explore menstruation-related stigma and discrimination.
5. To identify barriers and facilitators to promote menstrual health, and to access education and healthcare for menstrual health.
6. To identify opportunities to improve menstrual health-related experiences of YPM and reduce period poverty.
7. Provide recommendations for future research, policy and practice.

## **METHODS AND ANALYSIS**

The study will be coordinated by the research team at the [Research Centre name]. However, a working group of women that includes health professionals, educators, youth representatives and menstrual health activists has been composed, considering Responsible Research and Innovation (RRI) guidelines[15]. The members of the working group will regularly contribute to the development of the project attending regular meetings. They will also be involved in developing key study materials (e.g., study protocol, non-validated questionnaire, topic guides) and writing research publications and other dissemination materials. Taking this Responsible and Research Innovation (RRI) approach will be key to conducting inclusive research not only *for* but *with* the community and other key agents. This research is based on a gender-based [8,16,17] and intercultural approach [18–20]. These approaches go in line with acknowledging sociocultural differences and embracing a respectful and non-discriminatory perspective on research.

### **Study design**

This research is a convergent mixed-methods study that will include a quantitative study and a qualitative study. Quantitative research will allow to quantify the extent of period poverty and some menstrual health experiences. Qualitative research will provide an in-depth exploration of these phenomena. It will start in September 2019 and end in September 2021. A Gantt Chart is provided in Figure 1. Data will be collected in Catalan and Spanish, the two official language in the Barcelona metropolitan area.

### **Quantitative study**

1  
2  
3 This is a cross-sectional questionnaire-based study. A non-standardised questionnaire (see  
4 supplementary material) will be used to calculate the composite main variable “period poverty”.  
5 Other variables that will be measured and will be used to develop the variable “period poverty”.  
6 These will be: 1) use of menstrual products, 2) financial (and other) barriers to access menstrual  
7 products, 3) use of hormonal contraception, 4) period pain and menstrual disorders, 5) mental  
8 health, 6) access to menstrual health consultations, 7) menstruation-related school absenteeism,  
9 8) menstruation-related interference on school performance and other activities, 9) menstruation-  
10 related stigma and discrimination, 10) access to menstrual health education, and 11) menstrual  
11 hygiene and management.  
12  
13

14 Sociodemographic data will also be collected (age, school, primary healthcare centre, deprivation  
15 index, household composition). All variables and sociodemographic data (except for the  
16 deprivation index) will be collected using the self-reported questionnaire. The deprivation index  
17 will be calculated based on available databases such as the MEDEA deprivation index[21].  
18  
19

## 20 Qualitative study

21 There will be three phases of data collection for the qualitative study:  
22  
23

24 Phase I. Semi-structured interviews using photo elicitation techniques[22]: 20 YPM will take part  
25 in semi-structured interviews using photo elicitation techniques. These interviews will take place  
26 in schools making sure that participants are in a familiar and comfortable environment. The  
27 interviews will focus on objectives 2-4.  
28  
29

30 Phase II. Group discussions: Nine group discussions (three with YPM only, three with YNM, and  
31 three mixed) will be run with an estimate of 45 YPM and 45 YNM. Participants for the group  
32 discussions will be stratified by age (11-12 years old, 13-14 years old, and 15-16 years old). Group  
33 discussions will be conducted within the natural context of a classroom. Observation and group  
34 discussion techniques will be used to collect data. Objectives 2-6 will be covered in this phase of  
35 data collection.  
36  
37

38 Phase III. World Café[23]: Health professionals, teachers, policymakers, activists and youth  
39 representatives will be invited to participate in a world café. There will be a maximum of 12  
40 professionals in the session. The aim of phase III will be to mainly address objectives 4-6.  
41  
42

## 43 Materials

### 44 Quantitative study

45 A non-standardised questionnaire has been devised for this study by the working group (see  
46 supplementary material). Several meetings were organised to work on the development of the  
47  
48  
49  
50  
51  
52  
53  
54  
55  
56  
57  
58  
59  
60



1  
2  
3 variables and the questionnaire, following the guidance of previous research and published work  
4 on questionnaire design [24].  
5

### 6 7 Qualitative study 8

9  
10 Topic guides will be developed for each phase of the qualitative study. Developing the topic  
11 guides will be a collaborative process between the research team and the working group. The  
12 topic guides will be based on the aims of this research, previous evidence, the team's expertise  
13 and data previously collected for this study (Phase II and Phase III).  
14  
15

16  
17 The main topic areas will be 1) socio-cultural understandings of menstruation and menstrual  
18 health; 2) personal experiences of menstruation; 3) experiences of period poverty; 4) experiences  
19 of menstruation-related stigma and discrimination; 5) barriers and facilitators to promote  
20 menstrual health, and to access education and healthcare for menstrual health; and 6)  
21 opportunities to improve menstrual health-related experiences of YPM and reduce period poverty.  
22  
23

24  
25 All materials for the quantitative and qualitative studies will be piloted with the target population  
26 before using them for data collection.  
27  
28

### 29 30 **Participants** 31

32  
33 There will be different groups of participants: YPM, YNM, and professionals (health  
34 professionals, teachers, policymakers, activists, and youth representatives).  
35

### 36 37 Participant selection

38  
39 For both the quantitative and qualitative studies recruitment will be non-probabilistic (as not all  
40 schools and individuals will have the same probability of being recruited) and purposive (as  
41 schools and participants will be selected based on the requirements of the study).  
42  
43

44  
45 YPM and YNM will be recruited from (public, private and charter) schools in the Barcelona  
46 metropolitan area. Schools will be identified to be representative of the socioeconomic diversity  
47 in the Barcelona metropolitan area. The MEDEA index[21] will be used to determine the  
48 socioeconomic level of each school. Cultural diversity will also be a factor for recruiting schools  
49 and individuals. The team will ensure that the experiences of socially excluded communities, such  
50 as the gipsy community and migrants, are represented in this research. Considering that around  
51 18 schools will be recruited, we will aim to recruit three or four schools from each of the five  
52 MEDEA levels. First, permission will be requested from the council of each municipality where  
53 recruitment will take place. Then, schools will be contacted and informed about the study, based  
54 on a list of schools in the Barcelona metropolitan area and professional contacts of the working  
55 group. The research team will organise meetings at participating schools to inform staff and  
56  
57  
58  
59  
60



children about the study. Information sheets and consent forms will be given to children to inform and ask parents and legal tutors consent to participate. An adapted information sheet will be given to minors. Parents and legal tutors will be asked to return a signed copy of the consent form if they are willing for their children to participate. This procedure will be used for each stage of the project involving children (quantitative study and Phase I and II of the qualitative study).

In Phase III of the qualitative study, professionals will be recruited using snowballing techniques and by identifying key informants for this study. Diversity in the professionals' background and expertise will be considered to ensure diversity in the discourses. Participants will be required to sign an informed consent to take part in the study.

#### Inclusion and exclusion criteria

The inclusion and exclusion criteria are available in Tables 1-3. The researchers will not actively exclude people with functional diversities, unless they do not meet the inclusion criteria (e.g., they cannot give consent or communicate with the researchers).

Table 1

*Inclusion and exclusion criteria of young people who menstruate (YPM)*

| <b>Young people who menstruate (YPM)</b>             |                                               |
|------------------------------------------------------|-----------------------------------------------|
| <b>Inclusion criteria</b>                            | <b>Exclusion criteria</b>                     |
| Are between 11 and 16 years old                      | Are below 11 or above 16 years old            |
| Are attending a participating school                 | Have not (and will not) menstruate            |
| Have (or will) menstruate                            | Cannot understand and/or provide consent      |
| Have given their consent to participate              | Cannot communicate well in Catalan or Spanish |
| Parents or legal tutors have signed the consent form |                                               |
| Have a good command of Catalan or Spanish            |                                               |

Table 2

*Inclusion and exclusion criteria of young people who do not menstruate (YNM)*

| <b>Young people who do not menstruate (YNM)</b> |                                          |
|-------------------------------------------------|------------------------------------------|
| <b>Inclusion criteria</b>                       | <b>Exclusion criteria</b>                |
| Are between 11 and 16 years old                 | Are below 11 or above 16 years old       |
| Are attending a participating school            | Have (or will) menstruate                |
| Have not (and will not) menstruate              | Cannot understand and/or provide consent |

|                                                      |                                               |
|------------------------------------------------------|-----------------------------------------------|
| Have given their consent to participate              | Cannot communicate well in Catalan or Spanish |
| Parents or legal tutors have signed the consent form |                                               |
| Have a good command of Catalan or Spanish            |                                               |

Table 3

*Inclusion and exclusion criteria of professionals*

| <b>Professionals</b>                                               |                                                                           |
|--------------------------------------------------------------------|---------------------------------------------------------------------------|
| <b>Inclusion criteria</b>                                          | <b>Exclusion criteria</b>                                                 |
| Have experiences working in relevant areas of/for menstrual health | Do not have experiences working in relevant areas of/for menstrual health |
| Have signed the consent form                                       | Cannot understand and/or provide consent                                  |
| Have a good command of Catalan or Spanish                          | Cannot communicate well in Catalan or Spanish                             |

**Sample size**

## Quantitative study

A total of 871 YPM will be recruited for the quantitative study in 18 schools in the Barcelona Metropolitan area. The sample size is based on power calculations considering the composite variable “period poverty” as the main variable. Maximum indetermination of the main variable (proportion of 50%) was assumed. It was also considered that there are 53,354 young girls attending schools in the Barcelona metropolitan area between 11 and 16 years old. These assumptions were in order to obtain a precision of 5%, expecting that 50 young girls of each participating school will take part in the study. Also, due to the effect of the design an interclass correlation of 0,026 [3] will required a minimum of 871 participants (and 18 schools). These estimates have been calculated assuming an alfa risk of 5%. PASS software was used for the sample size calculations [PASS 15 Power Analysis and Sample Size Software (2017). NCSS, LLC. Kaysville, Utah, USA].

## Qualitative study

Sixty-five YPM, 45 YNM and 12 professionals (health professionals, teachers, policymakers, activists, and youth representatives) will be recruited for the qualitative study. The sample size will be dependent on data saturation.

**Data analysis plan**

### Quantitative study

Descriptive statistics will be used for each variable to identify asymmetric distributions. The continuous variables will be analysed as mean (SD) or median (25<sup>th</sup> and 75<sup>th</sup> centiles) based on the normality/non-normality of the distribution, and categorical variables will be described as percentages. To evaluate differences among groups, the appropriate statistics will be applied based on the type of variable and their distribution ( $\chi^2$ , F-distribution, Student's t-distribution, analysis of variance, Mann-Whitney U and Kruskal-Wallis). To estimate the magnitude of the associations between the selected variables and period poverty, prevalence ratios and their 95% confidence intervals will be computed by general linear models (Poisson regression models with robust variance and logistics models).

### Qualitative study

Qualitative data will be analysed using Thematic Content Analysis[23]. Once the audio recordings are transcribed, the researchers will familiarise themselves with the data. This will lead to pre-analytical insights of the data. The next step will be to 1) identify relevant themes within the text, 2) divide the text into units of meaning, 3) coding of the data, 4) generation of categories by grouping codes, 5) analysis of each category, and 6) elaboration of new text. Results will then be discussed with the working group until consensus is reached (triangulation).

### **Patient and Public Involvement**

The research questions and aims of this study were driven by community-led social movements on menstrual health and period poverty. Key agents and community members were consulted to design the study, being some of these agents part of the working group. The working group will be actively involved in all stages of the study. Together with participants, the working group will also contribute to the communication and dissemination of the findings (see Dissemination Strategy section on page 12). All materials used for this study (e.g., questionnaire and topic guides) will be designed and piloted with the target population.

### **Ethical considerations**

We have obtained the necessary ethical approvals prior to the start of the research from our organisation (IDIAPJGoL) [19/178-P]. We have considered a number of ethical issues. A main consideration is that this research involves the participation of individuals who are not able to give consent (minors). Child consent will be granted through representation (i.e., parents or legal tutors) according to the Spanish Law on Biomedical Research (14/2007).

1  
2  
3 All activities included in the study will be carried out according to existing guidance in ethics as  
4 indicated in the Universal Declaration on Bioethics and Human Rights adopted by UNESCO  
5 (19/10/2005); the Council of Europe Convention for the Protection of Human Rights and Dignity  
6 of the Human Being with regard to the Application of Biology and Medicine (1997) and its  
7 additional protocol on biomedical research (2005); the Helsinki Declaration (2013) and relevant  
8 EU laws (European Parliament and Council Directive 2001/20/EC); the Spanish Law on  
9 Biomedical Research (14/2007); and the LOPD (Spanish Law on Personal Data Protection)  
10 (3/2018).

#### 11 12 13 14 15 16 Informed consent

17  
18  
19 Verbal and written informed consent will be requested from all participants prior to their  
20 participation in the study. Most participants will be minors. This has important ethical  
21 implications. All information will be given to underage participants in a comprehensive way, and  
22 study materials will be adapted to ensure readability and comprehensiveness. Parents or legal  
23 guardians will be notified of their children's invitation to the study. A signed written consent will  
24 be requested from all parents or legal guardians for all underage participants. The researchers will  
25 ensure that participants are able to consent, and that they understand what their participation  
26 entails.  
27  
28  
29  
30  
31

#### 32 33 34 35 36 37 38 39 40 41 42 43 44 45 46 47 48 49 50 51 52 53 54 55 56 57 58 59 60 Confidentiality and anonymity

Confidentiality and anonymity will be carefully ensured. Contact details will only be requested to those participants that are willing to take part in succeeding stages of the study. Physical identifiable data will be securely stored at the IDIAPJGoL in a locked cabinet. Digital information will be securely stored at the IDIAPJGoL secure portal. Only the research team will have access to the data. All data presented when disseminating the findings from this study will be anonymised. All identifiable data will be removed from transcriptions and participants will be assigned a participant code. Anonymity in the photographs used in the photo-elicitation interviews will also be ensured. The team will do this by not using photographs in which people are identifiable, unless written consent is given from identifiable people in the photographs. Anonymised data will be made available upon request to the authors.

#### Potential risks

Taking part in this study will involve the discussion of sensitive topics (i.e., menstrual health, situations of inequity, sexual relationships, and other related topics) and involves the inclusion of a vulnerable group (minors). Discussing sensitive topics and the inclusion of minors are necessary for the purposes of this study. In order to minimise these issues, information about the nature of

1  
2  
3 the study will be disclosed prior to seeking consent and before data collection. The researchers  
4 will conduct the study sensitively at all times.  
5  
6

7 A protocol has been prepared in case the researchers had immediate concerns of harm, or a  
8 participant gets distressed during their participation in the study. If this happened with underage  
9 participants, their school tutor and parents will be informed (with the participants' permission).  
10 Participation will be paused or stopped if a participant gets distressed. It will be the participant's  
11 decision whether they decide to continue taking part in the study. The research team will ensure  
12 that all participants are able to seek support and/or advice if needed.  
13  
14  
15  
16

17 All participants will be made aware of their right to withhold information that they are not willing  
18 to share, as well as withdrawing from the study or removing their data at any time (prior to data  
19 analyses).  
20  
21  
22

23 Participants taking part in the interviews, group discussions and World Café will receive a 10€  
24 voucher as a token of thanks for their participation. Participants will also receive a debriefing  
25 form that includes a list of resources (books, websites and Instagram accounts) to learn about  
26 menstrual health.  
27  
28  
29

### 30 **Dissemination strategy**

31 Findings will be disseminated to key audiences. These will be YPM, YNM, parents and legal  
32 tutors, health professionals, educators, youth (and other relevant) organisations, general  
33 community members, stakeholders and policymakers, and academia. Back translation methods  
34 will be used to ensure the quality of any translations to English.  
35  
36  
37  
38

39 The dissemination strategy will include a dissemination project produced by YPM and YNM,  
40 with the support of the research team. The content and format will be chosen by YPM and YNM  
41 involved in the development of this dissemination project. Examples of formats would be an art  
42 exhibition or a book.  
43  
44  
45  
46

47 The working group will also organise meetings and workshops at "citizen science" events and  
48 schools, aimed at several key audiences. These meetings and workshops will involve study  
49 participants (YPM, YNM, and professionals) who will co-lead the sessions.  
50  
51

52 The working group will prepare short reports, policy briefs, presentations and meetings with  
53 stakeholders and policymakers, activists, health professionals, educators and youth (and other  
54 relevant) organisations. The materials, presentations and meetings will be prepared in  
55 collaboration with study participants.  
56  
57  
58  
59  
60

On the other hand, scientific publications will be prepared. The study will also be presented at national and international conferences. This part of the strategy will be led by the research team, with the collaboration of the working group and study participants.

## REFERENCES

- 1 Haque SE, Rahman M, Itsuko K, *et al.* The effect of a school-based educational intervention on menstrual health: An intervention study among adolescent girls in Bangladesh. *BMJ Open* 2014;**4**:1–9. doi:10.1136/bmjopen-2013-004607
- 2 Sommer M, Schmitt M, Gruer C, *et al.* Neglect of menarche and menstruation in the USA. *Lancet* 2019;**393**:2302. doi:10.1016/S0140-6736(19)30300-9
- 3 Montgomery P, Hennegan J, Dolan C, *et al.* Menstruation and the Cycle of Poverty: A Cluster Quasi-Randomised Control Trial of Sanitary Pad and Puberty Education Provision in Uganda. *PLoS One* 2016;**11**:e0166122. <https://doi.org/10.1371/journal.pone.0166122>
- 4 Tingle, C & Vora S. Break the Barriers : Girls ' Experiences of. *Plan Int UK* 2018;:1–68. <https://plan-uk.org/file/plan-uk-break-the-barriers-report-032018pdf/download?token=Fs-HYP3v>
- 5 Matteson KA, Zaluski KM. Menstrual Health as a Part of Preventive Health Care. *Obstet Gynecol Clin North Am* 2019;**46**:441–53. doi:10.1016/j.ogc.2019.04.004
- 6 American College of Obstetricians & Gynecologists Committee on Adolescent Health Care. Opinion no. 651: Menstruation in girls and adolescents: using the menstrual cycle as a vital sign. *Obstet Gynecol* 2015;:e143–6.
- 7 Botello Hermosa A, Casado Mejía R. Significado Cultural De La Menstruación En Mujeres Españolas. *Cienc y enfermería* 2017;**23**:89–97. doi:10.4067/s0717-95532017000300089
- 8 Valls-Llobet C. *Mujeres, salud y poder*. Madrid: : Cátedra (Feminismos) 2009.
- 9 Schoep ME, Adang EMM, Maas JWM, *et al.* Productivity loss due to menstruation-related symptoms: A nationwide cross-sectional survey among 32 748 women. *BMJ Open* 2019;**9**:1–10. doi:10.1136/bmjopen-2018-026186
- 10 Levinson R. Sexism in Medicine. *Am J Nurs* 1976;**76**:426–31. doi:10.2307/3423886
- 11 Schiebinger L. Skeletons in the Closet: The First Illustrations of the Female Skeleton in

- 1  
2  
3 Eighteenth-Century Anatomy. *Representations* 1986;:42–82. doi:10.2307/2928435  
4  
5  
6 12 Martin E. The Egg and the Sperm: How Science Has Constructed a Romance Based on  
7 Stereotypical Male-Female Roles. *Signs (Chic)* 1991;16:485–  
8 501.<http://www.jstor.org/stable/3174586>  
9  
10  
11 13 Young K, Fisher J, Kirkman M. Women’s experiences of endometriosis: A systematic  
12 review and synthesis of qualitative research. *J Fam Plan Reprod Heal Care*  
13 2015;41:225–34. doi:10.1136/jfprhc-2013-100853  
14  
15  
16 14 IDESCAT. Encuesta de condiciones de vida 2017.  
17 2018.<https://www.idescat.cat/novetats/?id=2991&lang=es>  
18  
19  
20 15 Owen R, Macnaghten P, Stilgoe J. Responsible research and innovation: From science in  
21 society to science for society, with society. *Sci Public Policy* 2012;39:751–60.  
22 doi:10.1093/scipol/scs093  
23  
24  
25 16 Ussher JM. *The Madness of Women*. New York: : Routledge 2011.  
26  
27  
28 17 Butler J. *Gender Trouble*. New York: : Routledge 2007.  
29  
30  
31 18 Kastoryano R. Multiculturalism and interculturalism: redefining nationhood and  
32 solidarity. *Comp Migr Stud* 2018;6. doi:10.1186/s40878-018-0082-6  
33  
34  
35 19 Fleckman JM, Dal Corso M, Ramirez S, *et al*. Intercultural Competency in Public  
36 Health: A Call for Action to Incorporate Training into Public Health Education. *Front*  
37 *public Heal* 2015;3:210. doi:10.3389/fpubh.2015.00210  
38  
39  
40 20 Zapata-Barrero R. Interculturalism in the post-multicultural debate: a defence. *Comp*  
41 *Migr Stud* 2017;5:14. doi:10.1186/s40878-017-0057-z  
42  
43  
44 21 Domínguez-Berjón, M. F. Borrell C, Cano-Serral G, Esnaola S, *et al*. Construcción de un  
45 índice de privación a partir de datos censales en grandes ciudades españolas (Proyecto  
46 MEDEA). *Gac Sanit* 2008;22:179–87.  
47  
48  
49 22 Minkler M, Wallerstein N. *Community based participatory research for health: Process*  
50 *to outcomes*. 2nd ed. San Francisco: : Jossey Bass 2008.  
51  
52  
53 23 Berenguera A, Fernández de Sanmamed MJ, Pons M, *et al*. *To Listen, To Observe and*  
54 *To Understand. Bringing Back Narrative into the Health Sciences. Contributions of*  
55 *Qualitative Research*. Barcelona: : Institut Universitari d’Investigació en Atenció  
56 Primària Jordi Gol (IDIAPJGol) 2017.  
57  
58  
59  
60

- 1  
2  
3 24 Boynton PM, Greenhalgh T. Hands-on guide to questionnaire research: Selecting,  
4 designing, and developing your questionnaire. *Br Med J* 2004;**328**:1312–5.  
5  
6 doi:10.1136/bmj.328.7451.1312  
7

## 8 **AUTHORS' CONTRIBUTIONS**

9  
10  
11 LMP has led and coordinated the conception and design of this study. She has written this  
12 manuscript. ABO has been involved in the conception and design in this study. She has reviewed  
13 and made substantial contributions to this manuscript. TLJ has contributed to the design of the  
14 quantitative study, performed power calculations and written the plan for the quantitative data  
15 analyses. He has reviewed and made substantial contributions to this manuscript. CJA, CVL,  
16 RTV, DP, LH, PBC, ESL and JMF have contributed to the design of this study. She has reviewed  
17 and made substantial contributions to this manuscript.  
18  
19  
20  
21

## 22 **FUNDING STATEMENT**

23  
24  
25 This work was supported by The European Society of Contraception and Reproductive Health,  
26 project number P-2019-A-01.  
27  
28

## 29 **COMPETING INTEREST STATEMENT**

30  
31 The authors declare no conflict of interest.  
32  
33

## 34 **ACKNOWLEDGEMENTS**

35  
36  
37 We would like to thank all women (and men) from the community who contributed to the ideas  
38 captured in this protocol. We would like to specially thank Carmen Revuelta Lisa, Ramona  
39 Ortiz López and Mònica Isido Albaladejo for their contributions to elaborating the materials and  
40 setting up recruitment and data collection.  
41  
42  
43

## 44 **FIGURE LEGEND**

45  
46 Figure 1. Gantt Chart.  
47  
48  
49  
50  
51  
52  
53  
54  
55  
56  
57  
58  
59  
60



FIGURE

| STUDY PHASES                    | TASKS                                                              | TEAM                        | Year 1 |   |   |   |   |   |   |   |   |    |    |    | Year 2 |   |   |   |   |   |   |   |   |    |    |    |
|---------------------------------|--------------------------------------------------------------------|-----------------------------|--------|---|---|---|---|---|---|---|---|----|----|----|--------|---|---|---|---|---|---|---|---|----|----|----|
|                                 |                                                                    |                             | Months |   |   |   |   |   |   |   |   |    |    |    | Months |   |   |   |   |   |   |   |   |    |    |    |
|                                 |                                                                    |                             | 1      | 2 | 3 | 4 | 5 | 6 | 7 | 8 | 9 | 10 | 11 | 12 | 1      | 2 | 3 | 4 | 5 | 6 | 7 | 8 | 9 | 10 | 11 | 12 |
| Transversal                     | Meetings research group                                            | Research team               | ■      | ■ | ■ | ■ | ■ | ■ | ■ | ■ | ■ | ■  | ■  | ■  | ■      | ■ | ■ | ■ | ■ | ■ | ■ | ■ | ■ | ■  |    |    |
|                                 | Meetings working group                                             | Working group               |        |   |   |   |   |   |   |   |   |    |    |    |        |   |   |   |   |   |   |   |   |    |    |    |
| Study preparation               | Ethical approvals                                                  | Research team               | ■      |   |   |   |   |   |   |   |   |    |    |    |        |   |   |   |   |   |   |   |   |    |    |    |
|                                 | Creation of working group                                          | Research team               | ■      |   |   |   |   |   |   |   |   |    |    |    |        |   |   |   |   |   |   |   |   |    |    |    |
|                                 | Development of study protocol                                      | Working group               | ■      |   |   |   |   |   |   |   |   |    |    |    |        |   |   |   |   |   |   |   |   |    |    |    |
|                                 | Development of study materials                                     | Working group               | ■      | ■ |   |   |   |   |   |   |   |    |    |    |        |   |   |   |   |   |   |   |   |    |    |    |
|                                 | Establish contacts for recruitment                                 | Working group               |        | ■ | ■ | ■ |   |   |   |   |   |    |    |    |        |   |   |   |   |   |   |   |   |    |    |    |
| Recruitment and data collection | Recruitment schools                                                | Working group               |        |   |   |   | ■ |   |   |   |   |    |    |    |        |   |   |   |   |   |   |   |   |    |    |    |
|                                 | Recruitment participants                                           | Research team               |        |   |   |   | ■ |   |   |   |   |    |    |    |        |   |   |   |   |   |   |   |   |    |    |    |
|                                 | Completion of questionnaires                                       | Research team               |        |   |   |   | ■ | ■ |   |   |   |    |    |    |        |   |   |   |   |   |   |   |   |    |    |    |
|                                 | Individual interviews                                              | Research team               |        |   |   |   |   | ■ | ■ |   |   |    |    |    |        |   |   |   |   |   |   |   |   |    |    |    |
|                                 | Group discussions                                                  | Research team               |        |   |   |   |   |   |   | ■ | ■ |    |    |    |        |   |   |   |   |   |   |   |   |    |    |    |
|                                 | World Café                                                         | Research team               |        |   |   |   |   |   |   |   |   | ■  |    |    |        |   |   |   |   |   |   |   |   |    |    |    |
| Data analyses                   | Transcribing                                                       | Research team; transcriber  |        |   |   |   |   | ■ | ■ | ■ | ■ | ■  |    |    |        |   |   |   |   |   |   |   |   |    |    |    |
|                                 | Quantitative analyses                                              | Research team               |        |   |   |   |   | ■ | ■ | ■ | ■ | ■  |    |    |        |   |   |   |   |   |   |   |   |    |    |    |
|                                 | Qualitative analyses                                               | Research team               |        |   |   |   |   |   |   |   |   |    | ■  | ■  | ■      |   |   |   |   |   |   |   |   |    |    |    |
|                                 | Discussion of results                                              | Working group               |        |   |   |   |   |   | ■ | ■ | ■ | ■  | ■  | ■  | ■      |   |   |   |   |   |   |   |   |    |    |    |
| Dissemination                   | Dissemination project                                              | Participants; working group |        |   |   |   |   |   |   |   |   |    |    |    |        |   | ■ | ■ | ■ | ■ | ■ | ■ | ■ | ■  |    |    |
|                                 | Dissemination of final product                                     | Participants; working group |        |   |   |   |   |   |   |   |   |    |    |    |        |   |   |   |   | ■ | ■ | ■ | ■ | ■  |    |    |
|                                 | Dissemination of results                                           | Working group               | ■      | ■ | ■ | ■ | ■ | ■ | ■ | ■ | ■ | ■  | ■  | ■  | ■      | ■ | ■ | ■ | ■ | ■ | ■ | ■ | ■ | ■  |    |    |
|                                 | Publication 1 (study protocol)                                     | Working group               | ■      | ■ | ■ | ■ | ■ | ■ | ■ | ■ | ■ | ■  | ■  | ■  | ■      | ■ | ■ | ■ | ■ | ■ | ■ | ■ | ■ | ■  |    |    |
|                                 | Publication 2 (quantitative data)                                  | Working group               |        |   |   |   |   |   |   |   | ■ | ■  | ■  | ■  |        |   |   |   |   |   |   |   |   |    |    |    |
|                                 | Publication 3 (qualitative data; interviews and group discussions) | Working group               |        |   |   |   |   |   |   |   |   |    |    |    |        |   | ■ | ■ | ■ | ■ | ■ | ■ | ■ | ■  |    |    |
|                                 | Publication 4 (qualitative data; world café)                       | Working group               |        |   |   |   |   |   |   |   |   |    |    |    |        |   |   |   | ■ | ■ | ■ | ■ | ■ | ■  |    |    |
| Evaluation and impact           | Impact evaluation                                                  | Working group               |        |   |   |   |   |   | ■ |   |   |    |    |    |        |   |   |   |   |   | ■ |   |   | ■  |    |    |

Figure 1. Gantt Chart

## MENSTRUAL HEALTH QUESTIONNAIRE

**You will need to complete all questions if you have menstruated already. Please complete questions 1 to 16 if you have not had the menstruation yet.**

Your answers are anonymous so nobody will be able to associate your answers with you. It is very important for you to know that there are no right or wrong answers, they are all welcome!

Date: \_\_\_\_\_

**Indicate with an X or write your answer the following questions**

1. How old are you? \_\_\_\_\_
2. What city do you live in? \_\_\_\_\_
3. What is the name of your school? \_\_\_\_\_
4. What are you studying? \_\_\_\_\_
5. What country were you born in? \_\_\_\_\_
6. What countries were your parents born in? *You do not need to answer if you do not know.*
  - My mum was born in \_\_\_\_\_
  - My dad was born in \_\_\_\_\_
8. Do you feel part of any of these communities? *Tick all options that are true for you*

|                                 |                                     |
|---------------------------------|-------------------------------------|
| <input type="radio"/> Gipsy     | <input type="radio"/> Buddhist      |
| <input type="radio"/> Christian | <input type="radio"/> Jewish        |
| <input type="radio"/> Catholic  | <input type="radio"/> Other _____   |
| <input type="radio"/> Islamic   | <input type="radio"/> None of these |
| <input type="radio"/> Hinduist  | <input type="radio"/> I don't know  |
9. Have you ever had the menstruation?
  - Yes
  - No
  - I don't know

- 1  
2  
3  
4  
5  
6  
7  
8  
9  
10  
11  
12  
13  
14  
15  
16  
17  
18  
19  
20  
21  
22  
23  
24  
25  
26  
27  
28  
29  
30  
31  
32  
33  
34  
35  
36  
37  
38  
39  
40  
41  
42  
43  
44  
45  
46  
47  
48  
49  
50  
51  
52  
53  
54  
55  
56  
57  
58  
59  
60
10. Do you think menstrual pain is “normal”?
- Yes, it always hurts
  - Yes, it hurts sometimes
  - No, it shouldn't hurt too much
  - No, it doesn't hurt
  - I don't know
11. Where have you learnt about the menstruation? *Tick all options that are true for you*
- Family
  - School
  - Friends
  - Internet
  - Social networks (e.g. Instagram)
  - TV
  - Magazines or books
  - Other \_\_\_\_\_
  - I don't know
12. Would you like to have more information about the menstruation? *Tick all options that are true for you*
- Yes, on what the menstruation is
  - Yes, on the duration of the menstruation
  - Yes, on how the menstruation can have an impact on my daily life
  - Yes, on menstruation delays
  - Yes, on menstrual products
  - Yes, on something else: \_\_\_\_\_
  - No, I have enough
  - No, I am not interested
  - I don't know
13. Are you embarrassed to talk about the menstruation?
- Yes
  - No
  - I don't know
14. What is the menstruation? *Tick all the options that you think are correct.*
- Blood that comes out of the vagina
  - People have them every 3 weeks
  - It is common to have it over 10 days or more
  - Women have the menstruation all their life
  - It has something to do with the menstrual cycle
  - I don't know

- 1  
2  
3  
4  
5  
6  
7  
8  
9  
10  
11  
12  
13  
14  
15  
16  
17  
18  
19  
20  
21  
22  
23  
24  
25  
26  
27  
28
15. What menstrual products do you know of (even if you have not used them)?
- Tampons
  - Single-use pads
  - Cloth menstrual pads (you need to wash and re-use)
  - Menstrual cup
  - Menstrual underwear (menstrual-proof underwear that you need to wash and re-use)
  - Menstrual sponges
  - Other: \_\_\_\_\_
  - I don't know
16. What is the menstrual cycle? *Tick all the options that you think are correct.*
- It has 3 phases
  - It has something to do with the hormones
  - There are no changes in the body during the menstrual cycle
  - It has something to do with ovulation
  - I don't know

29  
30  
31  
32  
33

**IF YOU HAVEN'T HAD THE MENSTRUATION, YOU HAVE FINISHED!**

**Thank you very much for participating!**

34  
35  
36  
37  
38  
39

**PLEASE, CONTINUE ANSWERING IF YOU HAVE HAD THE MENSTRUATION** 

- 40  
41  
42  
43  
44  
45  
46  
47  
48  
49  
50  
51  
52  
53  
54  
55  
56  
57  
58  
59  
60
17. How old were you when you had the menstruation for the first time? \_\_\_\_\_
18. Do you have menstrual pain?
- Yes, always
  - Yes, sometimes
  - Very few times
  - No, never
  - I don't know
19. What do you do when you have menstrual pain? *Tick all the things that you do.*
- I take painkillers (e.g. Ibuprofen, paracetamol...)
  - I take hormonal contraceptives every day for menstrual pain
  - I use natural remedies
  - I cannot buy products for menstrual pain
  - I don't do anything
  - I do something else: \_\_\_\_\_
  - I don't have menstrual pain
  - I don't know

- 1  
2  
3  
4  
5  
6  
7  
8  
9  
10  
11  
12  
13  
14  
15  
16  
17  
18  
19  
20  
21  
22  
23  
24  
25  
26  
27  
28  
29  
30  
31  
32  
33  
34  
35  
36  
37  
38  
39  
40  
41  
42  
43  
44  
45  
46  
47  
48  
49  
50  
51  
52  
53  
54  
55  
56  
57  
58  
59  
60
20. Have you every spoken to someone about menstrual pain?
- Yes, with \_\_\_\_\_ (*e.g., my mother*)
  - No, with anyone
  - I don't know
21. Do you stop going to school when you have the menstruation?
- Yes, always
  - Very few times
  - I don't know
  - Yes, sometimes
  - No, never
22. Do you stop exercising or going to physical education when you have the menstruation?
- Yes, always
  - Very few times
  - I don't know
  - Yes, sometimes
  - No, never
23. Do you stop doing activities such as going to the pool or to the beach when you have the menstruation?
- Yes, always
  - Very few times
  - I don't know
  - Yes, sometimes
  - No, never
24. Do you miss any plans with your friends when you have the menstruation?
- Yes, always
  - Very few times
  - I don't know
  - Yes, sometimes
  - No, never
25. Do you have trouble concentrating at school when you have the menstruation?
- Yes, always
  - Very few times
  - I don't know
  - Yes, sometimes
  - No, never
23. Do you feel less capable of doing an exam or evaluated activity when you have the menstruation?
- Yes, always
  - Very few times
  - I don't know
  - Yes, sometimes
  - No, never
24. Did you know what the menstruation was before having it for the first time?
- Yes
  - No
  - I don't know
25. Did you feel ready to have the menstruation when you had it for the first time?
- Yes
  - No
  - I don't know

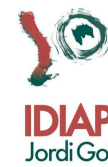

26. How do you usually feel when you have the menstruation? Tick all options that are true for you.

- Happy                                       Embarrassed                                       Other: \_\_\_\_\_  
 Sad                                                       Relaxed  
 Dirty                                                       Tired                                                       I don't know  
 Angry                                                       Sensitive

27. Are you scared of staining your clothes with blood when you have the menstruation?

- Yes  
 No  
 I don't know

28. How often have you made an excuse not to say that you were menstruating?

- Always                                                       Very few times                                                       I don't know  
 Sometimes                                                       Never

29. Has anyone ever made fun of you for having the menstruation?

- Yes  
 No  
 I don't know

30. Have you ever seen someone making fun of someone else for having the menstruation?

- Yes  
 No  
 I don't know

31. Are you embarrassed of buying or asking for menstrual products?

- Yes, always                                                       No, never  
 Yes, sometimes                                                       I don't know  
 Very few times                                                       Someone else buys them for me

32. What menstrual products do you use? Tick all the products that you use.

- Tampons                                                       I wear more than one piece of  
 Single-use pads                                                      underwear  
 Cloth menstrual pads                                                       Nappies  
 Menstrual cup                                                       I don't use anything (free bleeding)  
 Toilet paper                                                       Other: \_\_\_\_\_  
 Menstrual underwear                                                       I don't know  
 Menstrual sponge

33. Do you think menstrual products are too expensive?

- Yes  
 No  
 I don't know



- 1  
2  
3  
4  
5  
6  
7  
8  
9  
10  
11  
12  
13  
14  
15  
16  
17  
18  
19  
20  
21  
22  
23  
24  
25  
26  
27  
28  
29  
30  
31  
32  
33  
34  
35  
36  
37  
38  
39  
40  
41  
42  
43  
44  
45  
46  
47  
48  
49  
50  
51  
52  
53  
54  
55  
56  
57  
58  
59  
60
34. Have you ever lacked any money to buy menstrual products?
- Yes, always
  - Very few times
  - I don't know
  - Yes, sometimes
  - No, never
35. Have you ever had to use menstrual products that you don't like because the ones you like are too expensive?
- Yes, always
  - Very few times
  - I don't know
  - Yes, sometimes
  - No, never
36. Can you ask for menstrual products for free in your school?
- Yes
  - No
  - I don't know
37. Do you feel comfortable to ask for menstrual products in the following places? *Tick all options that are true for you.*
- School
  - Sports club
  - Youth centre
  - No, I don't feel comfortable
38. Have you ever gone to a health centre or pharmacy to ask about the menstruation?
- Yes
  - No, but I would like to go
  - No, but I would not like to go
  - I don't know
39. Have you ever used menstrual products for longer than it is recommended because you did not have a replacement?
- Yes, always
  - Very few times
  - I don't know
  - Yes, sometimes
  - No, never
40. Have you ever used menstrual products for longer than it is recommended because you do could not find appropriate facilities to (e.g., individual bathroom, soap to wash your hands, clean bathroom,...)?
- Yes, always
  - Very few times
  - I don't know
  - Yes, sometimes
  - No, never
41. In the last 6 months, have you had any of these symptoms?
- Genital rash
  - I haven't had any of these symptoms
  - Vaginal irritation
  - Other symptoms: \_\_\_\_\_
  - Genital redness or inflammation
  - Unusual vaginal discharge (colour/odour)
  - I don't know



42. If you have had symptoms, have you spoken about it with anyone?

- Yes, with \_\_\_\_\_
- No
- I don't know
- I haven't had any symptoms

43. If you have had symptoms, have you received any treatment?

- Yes, at \_\_\_\_\_ (e.g., health centre)
- No
- I don't know
- I haven't had any symptoms

**Would you like to add anything about the menstruation?**

**Let us know here:**

---



---



---



---

**THANK YOU VERY MUCH FOR YOUR PARTICIPATION!**

For peer review only



# BMJ Open

## Menstrual health and period poverty among young people who menstruate in the Barcelona metropolitan area (Spain): protocol of a mixed-methods study.

|                                 |                                                                                                                                                                                                                                                                                                                                                                                                                                                                                                                                                                                                                                                                                                                                                                                                                                                                                                                  |
|---------------------------------|------------------------------------------------------------------------------------------------------------------------------------------------------------------------------------------------------------------------------------------------------------------------------------------------------------------------------------------------------------------------------------------------------------------------------------------------------------------------------------------------------------------------------------------------------------------------------------------------------------------------------------------------------------------------------------------------------------------------------------------------------------------------------------------------------------------------------------------------------------------------------------------------------------------|
| Journal:                        | <i>BMJ Open</i>                                                                                                                                                                                                                                                                                                                                                                                                                                                                                                                                                                                                                                                                                                                                                                                                                                                                                                  |
| Manuscript ID                   | bmjopen-2019-035914.R3                                                                                                                                                                                                                                                                                                                                                                                                                                                                                                                                                                                                                                                                                                                                                                                                                                                                                           |
| Article Type:                   | Protocol                                                                                                                                                                                                                                                                                                                                                                                                                                                                                                                                                                                                                                                                                                                                                                                                                                                                                                         |
| Date Submitted by the Author:   | 17-Jun-2020                                                                                                                                                                                                                                                                                                                                                                                                                                                                                                                                                                                                                                                                                                                                                                                                                                                                                                      |
| Complete List of Authors:       | Medina-Perucha, Laura; IDIAP Jordi Gol, Jacques-Aviñó, Constanza; IDIAP Jordi Gol; Universitat Autònoma de Barcelona<br>Valls-Llobet, Carme; Centro de Análisis y Programas Sanitarios (CAPS) Turbau-Valls, Rosa; Institut Català de la Salut<br>Pinzón, Diana; SomiArte Taller; Universitat Autònoma de Barcelona<br>Hernández, Lola; La Caravana Roja<br>Briales Canseco, Paula; Comunidad de Madrid Consejería de Educación<br>López-Jiménez, Tomàs; Institut de Recerca en Atenció Primària Jordi Gol, Unitat Central de Recerca<br>Solana Lizarza, Enara; Universidad Internacional de la Rioja - Campus de Logrono, Department of Education<br>Munros Feliu, Jordina; Institut Català de la Salut, Atenció a la Salut Sexual i Reproductiva (ASSIR) Muntanya/La Mina<br>Berenguera, Anna; Institut Universitari d'Investigació en Atenció Primària (IDIAP-Jordi Gol), ; Universitat Autònoma de Barcelona, |
| <b>Primary Subject Heading</b>: | Obstetrics and gynaecology                                                                                                                                                                                                                                                                                                                                                                                                                                                                                                                                                                                                                                                                                                                                                                                                                                                                                       |
| Secondary Subject Heading:      | Public health                                                                                                                                                                                                                                                                                                                                                                                                                                                                                                                                                                                                                                                                                                                                                                                                                                                                                                    |
| Keywords:                       | Menstrual health, Health services, Education, Young people, SOCIAL MEDICINE, PUBLIC HEALTH                                                                                                                                                                                                                                                                                                                                                                                                                                                                                                                                                                                                                                                                                                                                                                                                                       |
|                                 |                                                                                                                                                                                                                                                                                                                                                                                                                                                                                                                                                                                                                                                                                                                                                                                                                                                                                                                  |

SCHOLARONE™  
Manuscripts



I, the Submitting Author has the right to grant and does grant on behalf of all authors of the Work (as defined in the below author licence), an exclusive licence and/or a non-exclusive licence for contributions from authors who are: i) UK Crown employees; ii) where BMJ has agreed a CC-BY licence shall apply, and/or iii) in accordance with the terms applicable for US Federal Government officers or employees acting as part of their official duties; on a worldwide, perpetual, irrevocable, royalty-free basis to BMJ Publishing Group Ltd ("BMJ") its licensees and where the relevant Journal is co-owned by BMJ to the co-owners of the Journal, to publish the Work in this journal and any other BMJ products and to exploit all rights, as set out in our [licence](#).

The Submitting Author accepts and understands that any supply made under these terms is made by BMJ to the Submitting Author unless you are acting as an employee on behalf of your employer or a postgraduate student of an affiliated institution which is paying any applicable article publishing charge ("APC") for Open Access articles. Where the Submitting Author wishes to make the Work available on an Open Access basis (and intends to pay the relevant APC), the terms of reuse of such Open Access shall be governed by a Creative Commons licence – details of these licences and which [Creative Commons](#) licence will apply to this Work are set out in our licence referred to above.

Other than as permitted in any relevant BMJ Author's Self Archiving Policies, I confirm this Work has not been accepted for publication elsewhere, is not being considered for publication elsewhere and does not duplicate material already published. I confirm all authors consent to publication of this Work and authorise the granting of this licence.

1  
2  
3 **Menstrual health and period poverty among young people who menstruate in the**  
4 **Barcelona metropolitan area (Spain): protocol of a mixed-methods study.**  
5

6  
7 Medina-Perucha, L.<sup>1</sup>, Jacques-Aviñó, C.<sup>1,2</sup>, Valls-Llobet, C.<sup>3</sup>, Turbau-Valls, R.<sup>4</sup>, Pinzón, D.<sup>2,5</sup>,  
8 Hernández, L.<sup>6</sup>, Briales Canseco, P.<sup>7</sup>, López-Jiménez, T.<sup>1,2</sup>, Solana Lizarza, E.<sup>8</sup>, Munrós Feliu,  
9 J.<sup>9</sup>, Berenguera, A.<sup>1,2,10</sup>  
10  
11

12  
13 <sup>1</sup> Fundació Institut Universitari per a la recerca a l'Atenció Primària de Salut Jordi Gol i Gurina  
14 (IDIAPJGol), Barcelona, Spain.  
15

16  
17 <sup>2</sup> Universitat Autònoma de Barcelona, Bellaterra (Cerdanyola del Vallès), Spain.  
18

19  
20 <sup>3</sup> Centro de Análisis y Programas Sanitarios (CAPS), Barcelona, Spain.  
21

22  
23 <sup>4</sup> Institut Català de la Salut (ICS), Barcelona, Spain.  
24

25  
26 <sup>5</sup> SomiArte Taller, Barcelona, Spain.  
27

28  
29 <sup>6</sup> La Caravana Roja, Murcia, Spain.  
30

31  
32 <sup>7</sup> Consejería de Educación, Comunidad de Madrid, Madrid, Spain.  
33

34  
35 <sup>8</sup> Universidad Internacional de La Rioja, Department of Education, Logroño, Spain.  
36

37  
38 <sup>9</sup> Atenció a la Salut Sexual i Reproductiva (ASSIR) Muntanya/La Mina. Institut Català de la  
39 Salut (ICS), Barcelona, Spain.  
40

41  
42 <sup>10</sup> Departament d'Infermeria, Universitat de Girona, Girona, Spain.  
43

44  
45 **Corresponding author**  
46

47 Dr Laura Medina-Perucha

48 Fundació Institut Universitari per a la recerca a l'Atenció Primària de Salut Jordi Gol i Gurina  
49 (IDIAPJGol)

50 Gran Via de les Corts Catalanes, 591, attic

51 08007 Barcelona (Spain)

52 lmedina@idiapjgol.info

53 (0034) 93 482 46 17  
54  
55

56  
57 **Word count:** 5,115.  
58  
59  
60

## ABSTRACT

**Introduction.** The importance of menstrual health has been historically neglected, mostly due to taboos and misconceptions around menstruation and androcentrism within health knowledge and health systems around the world. There has also been a lack of attention on “period poverty”, which refers to the financial, social, cultural and political barriers to access menstrual products and education. The main aim of this research is to explore menstrual health and experiences of period poverty among young people who menstruate (YPM). **Methods and analysis.** This is a convergent mixed-methods study which will combine a quantitative transversal study to identify the prevalence of period poverty among YPM (11-16 years old), and a qualitative study that will focus on exploring menstruation-related experiences of YPM and other groups (young people who do not menstruate (YNM); primary healthcare professionals; educators; and policymakers). The study will be conducted in the Barcelona metropolitan area between 2020 and 2021. Eighteen schools and 871 YPM will be recruited for the quantitative study. Sixty-five YPM will participate in the qualitative study. Forty-five YNM and 12 professionals will also be recruited to take part in the qualitative study. Socioeconomic and cultural diversity will be main vectors for recruitment, to ensure the findings are representative to the social and cultural context. Descriptive statistics will be performed for each variable to identify asymmetric distributions and differences among groups will be evaluated. Thematic analysis will be used for qualitative data analyses. **Ethics and dissemination.** Several ethical issues have been considered, especially as this study includes the participation of underage participants. The study has received ethical approval by the IDIAPJGol Research Ethics Committee [19/178-P]. Research findings will be disseminated to key audiences, such as YPM, YNM, parents/legal tutors, health professionals, educators, youth (and other relevant) organisations, general community members, stakeholders and policymakers, and academia.

## STRENGTHS AND LIMITATIONS OF THIS STUDY

- This study will address an important research gap on menstrual health and period poverty in high-income settings, from a gender and intercultural approach.
- A mixed-methods design will allow for the integration of quantitative (descriptive) and qualitative (in-depth) data.
- This study includes collaborations with a variety of key actors, following Responsible and Research Innovation (RRI) guidelines.
- The dissemination strategy includes a variety of audiences and will be co-created with study participants.
- The combination of data collection methods, and using a RRI and participatory research approach will require increased resources and time.

## KEYWORDS

Menstrual health; period poverty; health services; education; young people

## INTRODUCTION

Research on menstrual health is still scarce. Moreover, most research has been conducted in low-income countries[1–3], neglecting its need in high-income regions. Menstrual health is associated with the access of people who menstruate to accurate information on menstruation, menstrual products and clean and safe washing facilities. Menstrual health also needs to be understood as a tool for health promotion, and it is linked to experiences related to the menstrual cycle. Good menstrual health also includes tackling menstruation-related taboos, stigma and discrimination[4]. Promoting menstrual health is key to reach gender equity and promote health among people who menstruate. Menstrual health has even been suggested as a vital sign[5,6]. Despite the growing international commitment to focus on promoting menstrual health, there is still much to be done[2]. In this study, we will focus on “people who menstruate” rather than “women” not to exclude people who have a menstrual cycle but are not women/do not identify as women (e.g., male transsexual or male transgender).

Activist-led movements have increased awareness on the negative impact on the cost of menstrual products, socio-cultural practices and views on menstruation have on women’s health and wellbeing. These movements aim at promoting a “menstrual culture” that demystifies the menstrual cycle and are based on feminist and socio-cultural paradigms. Together with some health professionals, activism in Spain is already suggesting body awareness and knowledge about one’s menstrual cycle as tools for health promotion. Menstrual health education is crucial to understand and improve how people who menstruate relate to their menstrual cycle[4,7]. However, the role of the “menstrual products” and pharmaceutical industries in women’s menstrual health is strong. These are the companies which are delivering menstrual health education in schools in Spain. Considering that these events are enough for “menstrual health education” is questionable, as these companies rather focus on selling their products and on medicalising menstruation instead of delivering high quality education on the menstrual cycle and the wide range of products available[8]. In the meantime, many people who menstruate in Spain seem to still be unaware of how their menstrual cycle works and its relationship with their overall health[8].

Focusing on young people is crucial to understand their conceptions and experiences of menarche (first menstruation). Good health education among young people is a priority as their bodies are changing while reaching adulthood. As previously reported in a study by Plan International UK[4], it is essential that young people get access to menstrual health education, health services

1  
2  
3 and products that protect their health and wellbeing. In this study, menstrual-related myths and  
4 taboos were prevalent among young people. Stigma and embarrassment were a reality for many  
5 girls as, for example, most of them did not feel comfortable discussing menstruation with their  
6 school teachers. Besides and very importantly, most girls explained how they were unaware of  
7 what was happening in their bodies and what to do when they first got their menstruation[4].  
8 Another reason to focus on children and adolescents is that they are vulnerable groups to  
9 experience stigma, discrimination, and social and health inequities.  
10  
11  
12  
13  
14

15 Inequities between people who menstruate and people who do not menstruate are also to be  
16 highlighted. These are, for example, visible through the (still prevailing) stigma and  
17 discrimination towards people who menstruate and menstruation itself[4]. In line with this  
18 argument, productivity loss due to presentism and absenteeism at schools and workplaces among  
19 people who experience menstrual pain needs to be considered too[9]. Social and health inequities  
20 among people who menstruate (compared to people who do not menstruate) can be also explained  
21 when menstruating is a source of social (e.g., normalisation of menstrual pain) and structural (e.g.,  
22 not being able to get sick leave for menstrual pain) sanctions.  
23  
24  
25  
26  
27  
28

29 The menstrual cycle is not a health condition to be medicalised. However, this is not how it seems  
30 to be conceived within society and healthcare systems. This project stems from an opposition to  
31 the predominant androcentrism in health science and healthcare systems. The concept of  
32 androcentrism refers to having men (male humans) as the reference, the norm and the example  
33 for all humans. In the health context this has translated into the invisibilisation of women, the  
34 female body and women's health in health science, policy and practice[8,10–12]. As briefly  
35 mentioned already, this project also questions the role of the industry (menstrual products and  
36 pharmaceutical) in the medicalisation and socio-cultural conceptualisations of the menstrual cycle  
37 and menstruation[8]. Instead, it is important that the menstrual cycle is understood as a natural  
38 process that is associated with good health. This means that educating society and professionals  
39 is a priority to promote health among young people who menstruate (YPM). Increased education  
40 and a more positive conceptualisation of the menstrual cycle and menstruation could help YPM  
41 being more aware of their bodies. In turn, this could help encourage menstruators to care for their  
42 menstrual and general health, and aid the identification of some health conditions such as  
43 endometriosis[13]. Improved education could also lead the disassociation of menstruation and  
44 pain, and challenge myths and beliefs around the menstrual cycle and the use of hormonal  
45 contraception. Last but not least, education could reduce menstruation-related stigma and  
46 discrimination.  
47  
48  
49  
50  
51  
52  
53  
54  
55  
56

57 One aspect of menstrual health is the access to menstrual products. Research in other countries,  
58 such as Uganda[3] and the United Kingdom[4] has highlighted experiences of *period poverty*  
59  
60

1  
2  
3 among young women. This term refers to barriers (financial, social, cultural and political) in  
4 accessing menstrual products, menstrual education and access to healthcare services. Plan  
5 International UK[4] recently explored period poverty in a high-income country through focus  
6 groups with 64 adolescents. Their report revealed that 1 in 10 adolescents experience period  
7 poverty in the United Kingdom. However, and to our knowledge, there have been no attempts to  
8 identify the prevalence of period poverty at a community or population level.  
9  
10  
11  
12

13 Despite social movements to promote menstrual health and to reduce menstrual products' taxes  
14 in the last few years, menstrual health in Spain continues to be ignored. This is reflected in  
15 national and regional public health strategies, in which menstrual health is never present. Even  
16 when 27,7% of children were at risk of poverty in Catalunya in 2017[14], experiences of period  
17 poverty among children and adolescents have not been explored. Social, cultural, financial and  
18 political barriers to promote menstrual health, stigma and discrimination and the elimination of  
19 period poverty have also been overlooked. Besides, menstrual products are not considered  
20 necessity goods by law in Spain, holding a 10% tax (Spanish Law 37/1992, 28<sup>th</sup> December 2018).  
21 Although in October 2018 the Spanish government guaranteed that tax retentions on menstrual  
22 products should be reduced to 4%, this tax reduction has not been applied yet.  
23  
24  
25  
26  
27  
28  
29

30 This study will explore menstrual health and experiences of period poverty among YPM. We also  
31 hope to identify barriers and facilitators that could promote menstrual health through the access  
32 of good-quality education and healthcare. Also, to explore ways to improve menstrual health  
33 experiences in YPM and reduce period poverty. This study will provide recommendations for  
34 future research, policy and practice, aiming at addressing social inequities of health in YPM (and  
35 especially amongst those that may be experiencing period poverty) in Spain and other high-  
36 income countries with similar sociocultural contexts. The views of young people who do not  
37 menstruate and professionals will also be considered in this project. Through this research, our  
38 team aims to start a line of research on menstrual health and period poverty in the area of  
39 Barcelona, hoping to scale up the study to other areas in Spain.  
40  
41  
42  
43  
44  
45  
46

#### 47 **AIMS AND OBJECTIVES**

48  
49 This project aims to explore menstrual health and experiences of period poverty among young  
50 people who menstruate (YPM) (11-16 years old). The study will be conducted in the Barcelona  
51 metropolitan area between 2019 and 2021.  
52  
53  
54

55 The objectives will be:

- 56  
57 1. To identify the prevalence of period poverty in YPM.  
58  
59  
60



- 2.
3. To explore socio-cultural understandings of menstruation and menstrual health in YPM, young people who do not menstruate (YNM) of the same age, health professionals, teachers, activists and policymakers.
4. To explore experiences of menstruation and period poverty among YPM.
5. To explore menstruation-related stigma and discrimination.
6. To identify barriers and facilitators to promote menstrual health, and to access education and healthcare for menstrual health.
7. To identify opportunities to improve menstrual health-related experiences of YPM and reduce period poverty.
8. Provide recommendations for future research, policy and practice.

## METHODS AND ANALYSIS

The study will be coordinated by the research team at the [Research Centre name]. However, a working group of women that includes health professionals, educators, youth representatives and menstrual health activists has been composed, considering Responsible Research and Innovation (RRI) guidelines[15]. The members of the working group will regularly contribute to the development of the project attending regular meetings. They will also be involved in developing key study materials (e.g., study protocol, non-validated questionnaire, topic guides) and writing research publications and other dissemination materials. Taking this Responsible and Research Innovation (RRI) approach will be key to conduct inclusive research not only *for* but *with* the community and other key agents. This research is based on a gender-based [8,16,17] and intercultural approach [18–20]. These approaches go in line with acknowledging sociocultural differences and embracing a respectful and non-discriminatory perspective on research.

### Study design

This research is a convergent mixed-methods study that will include a quantitative study and a qualitative study. Quantitative research will allow to quantify the extent of period poverty and some menstrual health experiences. Qualitative research will provide an in-depth exploration of these phenomena. It will start in September 2019 and end in September 2021. A Gantt Chart is provided in Figure 1. Data will be collected in Catalan and Spanish, the two official languages in the Barcelona metropolitan area.

### Quantitative study

This is a cross-sectional questionnaire-based study. A non-standardised questionnaire (see supplementary material) will be used to calculate the composite main variable “period poverty”. Other variables that will be measured and will be used to develop the variable “period poverty”.



1  
2  
3 These will be: 1) use of menstrual products, 2) financial (and other) barriers to access menstrual  
4 products, 3) use of hormonal contraception, 4) period pain and menstrual disorders, 5) mental  
5 health, 6) access to menstrual health consultations, 7) menstruation-related school absenteeism,  
6 8) menstruation-related interference on school performance and other activities, 9) menstruation-  
7 related stigma and discrimination, 10) access to menstrual health education, and 11) menstrual  
8 hygiene and management.  
9  
10  
11

12  
13 Sociodemographic data will also be collected (age, school, primary healthcare centre, deprivation  
14 index, household composition). All variables and sociodemographic data (except for the  
15 deprivation index) will be collected using the self-reported questionnaire. The deprivation index  
16 will be calculated based on available databases such as the MEDEA deprivation index[21].  
17  
18  
19

## 20 21 Qualitative study

22  
23 There will be three phases of data collection for the qualitative study:  
24

25 Phase I. Semi-structured interviews using photo elicitation techniques[22]: 20 YPM will take part  
26 in semi-structured interviews using photo elicitation techniques. These interviews will take place  
27 in schools making sure that participants are in a familiar and comfortable environment. The  
28 interviews will focus on objectives 2-4.  
29  
30

31  
32 Phase II. Group discussions: Nine group discussions (three with YPM only, three with YNM, and  
33 three mixed) will be run with an estimate of 45 YPM and 45 YNM. Participants for the group  
34 discussions will be stratified by age (11-12 years old, 13-14 years old, and 15-16 years old). Group  
35 discussions will be conducted within the natural context of a classroom. Observation and group  
36 discussion techniques will be used to collect data. Objectives 2-6 will be covered in this phase of  
37 data collection.  
38  
39

40  
41 Phase III. World Café[23]: Health professionals, teachers, policymakers, activists and youth  
42 representatives will be invited to participate in a world café. There will be a maximum of 12  
43 professionals in the session. The aim of phase III will be to mainly address objectives 4-6.  
44  
45  
46  
47

## 48 49 **Materials**

### 50 51 Quantitative study

52  
53 A non-standarised questionnaire has been devised for this study by the working group (see  
54 supplementary material). Several meetings were organised to work on the development of the  
55 variables and the questionnaire, following the guidance of previous research and published work  
56 on questionnaire design [24].  
57  
58  
59  
60

## Qualitative study

Topic guides will be developed for each phase of the qualitative study. Developing the topic guides will be a collaborative process between the research team and the working group. The topic guides will be based on the aims of this research, previous evidence, the team's expertise and data previously collected for this study (Phase II and Phase III).

The main topic areas will be 1) socio-cultural understandings of menstruation and menstrual health; 2) personal experiences of menstruation; 3) experiences of period poverty; 4) experiences of menstruation-related stigma and discrimination; 5) barriers and facilitators to promote menstrual health, and to access education and healthcare for menstrual health; and 6) opportunities to improve menstrual health-related experiences of YPM and reduce period poverty.

All materials for the quantitative and qualitative studies will be piloted with the target population before using them for data collection.

## Participants

There will be different groups of participants: YPM, YNM, and professionals (health professionals, teachers, policymakers, activists, and youth representatives).

### Participant selection

For both the quantitative and qualitative studies recruitment will be non-probabilistic (as not all schools and individuals will have the same probability of being recruited) and purposive (as schools and participants will be selected based on the requirements of the study).

YPM and YNM will be recruited from (public, private and semi-private) schools in the Barcelona metropolitan area. Schools will be identified to be representative of the socioeconomic diversity in the Barcelona metropolitan area. The MEDEA index[21] will be used to determine the socioeconomic level of each school. Cultural diversity will also be a factor for recruiting schools and individuals. The team will ensure that the experiences of socially excluded communities, such as the gipsy community and migrants, are represented in this research. Considering that around 18 schools will be recruited, we will aim to recruit three or four schools from each of the five MEDEA levels. First, permission will be requested from the council of each municipality where recruitment will take place. Then, schools will be contacted and informed about the study, based on a list of schools in the Barcelona metropolitan area and professional contacts of the working group. The research team will organise meetings at participating schools to inform staff and adolescents about the study. Information sheets and consent forms will be given to adolescents to inform and ask parents and legal tutors for consent to participate. An adapted information sheet will be given to minors. Parents and legal tutors will be asked to return a signed copy of the

consent form if they want their children to participate. This procedure will be used for each stage of the project involving adolescents (quantitative study and Phase I and II of the qualitative study).

In Phase III of the qualitative study, professionals will be recruited using snowballing techniques and by identifying key informants for this study. Diversity in the professionals' background and expertise will be considered to ensure diversity in the discourses. Participants will be required to sign an informed consent to take part in the study.

#### Inclusion and exclusion criteria

The inclusion and exclusion criteria are available in Tables 1-3. The researchers will not actively exclude people with functional diversities, unless they do not meet the inclusion criteria (e.g., they cannot give consent or communicate with the researchers).

Table 1

*Inclusion and exclusion criteria of young people who menstruate (YPM)*

| <b>Young people who menstruate (YPM)</b>             |                                               |
|------------------------------------------------------|-----------------------------------------------|
| <b>Inclusion criteria</b>                            | <b>Exclusion criteria</b>                     |
| Are between 11 and 16 years old                      | Are below 11 or above 16 years old            |
| Are attending a participating school                 | Have not (and will not) menstruate            |
| Have (or will) menstruate                            | Cannot understand and/or provide consent      |
| Have given their consent to participate              | Cannot communicate well in Catalan or Spanish |
| Parents or legal tutors have signed the consent form |                                               |
| Have a good command of Catalan or Spanish            |                                               |

Table 2

*Inclusion and exclusion criteria of young people who do not menstruate (YNM)*

| <b>Young people who do not menstruate (YNM)</b> |                                               |
|-------------------------------------------------|-----------------------------------------------|
| <b>Inclusion criteria</b>                       | <b>Exclusion criteria</b>                     |
| Are between 11 and 16 years old                 | Are below 11 or above 16 years old            |
| Are attending a participating school            | Have (or will) menstruate                     |
| Have not (and will not) menstruate              | Cannot understand and/or provide consent      |
| Have given their consent to participate         | Cannot communicate well in Catalan or Spanish |

|                                                      |  |
|------------------------------------------------------|--|
| Parents or legal tutors have signed the consent form |  |
| Have a good command of Catalan or Spanish            |  |

Table 3

*Inclusion and exclusion criteria of professionals*

| <b>Professionals</b>                                              |                                                                          |
|-------------------------------------------------------------------|--------------------------------------------------------------------------|
| <b>Inclusion criteria</b>                                         | <b>Exclusion criteria</b>                                                |
| Have experience working in relevant areas of/for menstrual health | Do not have experience working in relevant areas of/for menstrual health |
| Have signed the consent form                                      | Cannot understand and/or provide consent                                 |
| Have a good command of Catalan or Spanish                         | Cannot communicate well in Catalan or Spanish                            |

**Sample size**

## Quantitative study

A total of 871 YPM will be recruited for the quantitative study in 18 schools in the Barcelona Metropolitan area. The sample size is based on power calculations considering the composite variable “period poverty” as the main variable. Maximum indetermination of the main variable (proportion of 50%) was assumed. It was also considered that there are 53,354 young girls attending schools in the Barcelona metropolitan area between 11 and 16 years old. These assumptions were considered in order to obtain a precision of 5%, expecting that 50 young girls of each participating school will take part in the study. Also, due to the effect of the design an interclass correlation of 0,026 [3] will require a minimum of 871 participants (and 18 schools). These estimates have been calculated assuming an alfa risk of 5%. PASS software was used for the sample size calculations [PASS 15 Power Analysis and Sample Size Software (2017). NCSS, LLC. Kaysville, Utah, USA].

## Qualitative study

Sixty-five YPM, 45 YNM and 12 professionals (health professionals, teachers, policymakers, activists, and youth representatives) will be recruited for the qualitative study. The sample size will be dependent on data saturation.

**Data analysis plan**

## Quantitative study

1  
2  
3 Descriptive statistics will be used for each variable to identify asymmetric distributions. The  
4 continuous variables will be analysed as mean (SD) or median (25<sup>th</sup> and 75<sup>th</sup> centiles) based on  
5 the normality/non-normality of the distribution, and categorical variables will be described as  
6 percentages. To evaluate differences among groups, the appropriate statistics will be applied  
7 based on the type of variable and their distribution ( $\chi^2$ , F-distribution, Student's t-distribution,  
8 analysis of variance, Mann-Whitney U and Kruskal-Wallis). To estimate the magnitude of the  
9 associations between the selected variables and period poverty, prevalence ratios and their 95%  
10 confidence intervals will be computed by general linear models (Poisson regression models with  
11 robust variance and logistics models).  
12  
13  
14  
15  
16

### 17 18 Qualitative study

19  
20 Qualitative data will be analysed using Thematic Content Analysis[23]. Once the audio  
21 recordings are transcribed, the researchers will familiarise themselves with the data. This will lead  
22 to pre-analytical insights of the data. The next step will be to 1) identify relevant themes within  
23 the text, 2) divide the text into units of meaning, 3) coding of the data, 4) generation of categories  
24 by grouping codes, 5) analysis of each category, and 6) elaboration of new text. Results will then  
25 be discussed with the working group until consensus is reached (triangulation).  
26  
27  
28  
29  
30

### 31 32 **Patient and Public Involvement**

33  
34 The research questions and aims of this study were driven by community-led social movements  
35 on menstrual health and period poverty. Key agents and community members were consulted to  
36 design the study, being some of these agents part of the working group. The working group will  
37 be actively involved in all stages of the study. Together with participants, the working group will  
38 also contribute to the communication and dissemination of the findings (see Dissemination  
39 Strategy section on page 12). All materials used for this study (e.g., questionnaire and topic  
40 guides) will be designed and piloted with the target population.  
41  
42  
43  
44  
45

### 46 47 **Ethics and Dissemination**

#### 48 49 **Ethical considerations**

50  
51 We have obtained the necessary ethical approvals prior to the start of the research from our  
52 organisation (IDIAPJGoL) [19/178-P]. We have considered a number of ethical issues. A main  
53 consideration is that this research involves the participation of individuals who are not able to  
54 give consent (minors). Adolescents' consent will be granted through representation (i.e., parents  
55 or legal tutors) according to the Spanish Law on Biomedical Research (14/2007).  
56  
57  
58  
59  
60

1  
2  
3 All activities included in the study will be carried out according to existing guidance in ethics as  
4 indicated in the Universal Declaration on Bioethics and Human Rights adopted by UNESCO  
5 (19/10/2005); the Council of Europe Convention for the Protection of Human Rights and Dignity  
6 of the Human Being with regard to the Application of Biology and Medicine (1997) and its  
7 additional protocol on biomedical research (2005); the Helsinki Declaration (2013) and relevant  
8 EU laws (European Parliament and Council Directive 2001/20/EC); the Spanish Law on  
9 Biomedical Research (14/2007); and the LOPD (Spanish Law on Personal Data Protection)  
10 (3/2018).

#### 11 12 13 14 15 16 Informed consent

17  
18  
19 Verbal and written informed consent will be requested from all participants prior to their  
20 participation in the study. Most participants will be minors. This has important ethical  
21 implications. All information will be given to underage participants in a comprehensive way, and  
22 study materials will be adapted to ensure readability and comprehensiveness. Parents or legal  
23 guardians will be notified of their adolescents' invitation to the study. A signed written consent  
24 will be requested from all parents or legal guardians for all underage participants. The researchers  
25 will ensure that participants are able to consent, and that they understand what their participation  
26 entails.  
27  
28  
29  
30  
31

#### 32 33 34 35 36 37 38 39 40 41 42 43 44 45 46 47 48 49 50 51 52 53 54 55 56 57 58 59 60 Confidentiality and anonymity

Confidentiality and anonymity will be carefully ensured. Contact details will only be requested to those participants that are willing to take part in succeeding stages of the study. Physical identifiable data will be securely stored at the IDIAPJGoL in a locked cabinet. Digital information will be securely stored at the IDIAPJGoL secure portal. Only the research team will have access to the data. All data presented when disseminating the findings from this study will be anonymised. All identifiable data will be removed from transcriptions and participants will be assigned a participant code. Anonymity in the photographs used in the photo-elicitation interviews will also be ensured. The team will do this by not using photographs in which people are identifiable, unless written consent is given from identifiable people in the photographs. Anonymised data will be made available upon request to the authors.

#### Potential risks

Taking part in this study will involve the discussion of sensitive topics (i.e., menstrual health, situations of inequity, sexual relationships, and other related topics) and involves the inclusion of a vulnerable group (minors). Discussing sensitive topics and the inclusion of minors are necessary for the purposes of this study. In order to minimise these issues, information about the nature of

1  
2  
3 the study will be disclosed prior to seeking consent and before data collection. The researchers  
4 will conduct the study sensitively at all times.  
5  
6

7 A protocol has been prepared in case the researchers had immediate concerns of harm, or a  
8 participant gets distressed during their participation in the study. If this happened with underage  
9 participants, their school tutor and parents will be informed (with the participants' permission).  
10 Participation will be paused or stopped if a participant gets distressed. It will be the participant's  
11 decision whether they decide to continue taking part in the study. The research team will ensure  
12 that all participants are able to seek support and/or advice if needed.  
13  
14  
15  
16

17 All participants will be made aware of their right to withhold information that they are not willing  
18 to share, as well as withdrawing from the study or removing their data at any time (prior to data  
19 analyses).  
20  
21  
22

23 Participants taking part in the interviews, group discussions and World Café will receive a 10€  
24 voucher as a token of thanks for their participation. Participants will also receive a debriefing  
25 form that includes a list of resources (books, websites and Instagram accounts) to learn about  
26 menstrual health.  
27  
28  
29

### 30 **Dissemination strategy**

31 Findings will be disseminated to key audiences. These will be YPM, YNM, parents and legal  
32 tutors, health professionals, educators, youth (and other relevant) organisations, general  
33 community members, stakeholders and policymakers, and academia. Back translation methods  
34 will be used to ensure the quality of any translations to English.  
35  
36  
37  
38

39 The dissemination strategy will include a dissemination project produced by YPM and YNM,  
40 with the support of the research team. The content and format will be chosen by YPM and YNM  
41 involved in the development of this dissemination project. Examples of formats would be an art  
42 exhibition or a book.  
43  
44  
45  
46

47 The working group will also organise meetings and workshops at "citizen science" events and  
48 schools, aimed at several key audiences. These meetings and workshops will involve study  
49 participants (YPM, YNM, and professionals) who will co-lead the sessions.  
50  
51

52 The working group will prepare short reports, policy briefs, presentations and meetings with  
53 stakeholders and policymakers, activists, health professionals, educators and youth (and other  
54 relevant) organisations. The materials, presentations and meetings will be prepared in  
55 collaboration with study participants.  
56  
57  
58  
59  
60

On the other hand, scientific publications will be prepared. The study will also be presented at national and international conferences. This part of the strategy will be led by the research team, with the collaboration of the working group and study participants.

## REFERENCES

- 1 Haque SE, Rahman M, Itsuko K, *et al.* The effect of a school-based educational intervention on menstrual health: An intervention study among adolescent girls in Bangladesh. *BMJ Open* 2014;**4**:1–9. doi:10.1136/bmjopen-2013-004607
- 2 Sommer M, Schmitt M, Gruer C, *et al.* Neglect of menarche and menstruation in the USA. *Lancet* 2019;**393**:2302. doi:10.1016/S0140-6736(19)30300-9
- 3 Montgomery P, Hennegan J, Dolan C, *et al.* Menstruation and the Cycle of Poverty: A Cluster Quasi-Randomised Control Trial of Sanitary Pad and Puberty Education Provision in Uganda. *PLoS One* 2016;**11**:e0166122. <https://doi.org/10.1371/journal.pone.0166122>
- 4 Tingle, C & Vora S. Break the Barriers : Girls ' Experiences of. *Plan Int UK* 2018;:1–68. <https://plan-uk.org/file/plan-uk-break-the-barriers-report-032018pdf/download?token=Fs-HYP3v>
- 5 Matteson KA, Zaluski KM. Menstrual Health as a Part of Preventive Health Care. *Obstet Gynecol Clin North Am* 2019;**46**:441–53. doi:10.1016/j.ogc.2019.04.004
- 6 American College of Obstetricians & Gynecologists Committee on Adolescent Health Care. Opinion no. 651: Menstruation in girls and adolescents: using the menstrual cycle as a vital sign. *Obstet Gynecol* 2015;:e143–6.
- 7 Botello Hermosa A, Casado Mejía R. Significado Cultural De La Menstruación En Mujeres Españolas. *Cienc y enfermería* 2017;**23**:89–97. doi:10.4067/s0717-95532017000300089
- 8 Valls-Llobet C. *Mujeres, salud y poder*. Madrid: : Cátedra (Feminismos) 2009.
- 9 Schoep ME, Adang EMM, Maas JWM, *et al.* Productivity loss due to menstruation-related symptoms: A nationwide cross-sectional survey among 32 748 women. *BMJ Open* 2019;**9**:1–10. doi:10.1136/bmjopen-2018-026186
- 10 Levinson R. Sexism in Medicine. *Am J Nurs* 1976;**76**:426–31. doi:10.2307/3423886
- 11 Schiebinger L. Skeletons in the Closet: The First Illustrations of the Female Skeleton in



- 1  
2  
3 Eighteenth-Century Anatomy. *Representations* 1986;:42–82. doi:10.2307/2928435  
4  
5  
6 12 Martin E. The Egg and the Sperm: How Science Has Constructed a Romance Based on  
7 Stereotypical Male-Female Roles. *Signs (Chic)* 1991;16:485–  
8 501.<http://www.jstor.org/stable/3174586>  
9  
10  
11 13 Young K, Fisher J, Kirkman M. Women’s experiences of endometriosis: A systematic  
12 review and synthesis of qualitative research. *J Fam Plan Reprod Heal Care*  
13 2015;41:225–34. doi:10.1136/jfprhc-2013-100853  
14  
15  
16 14 IDESCAT. Encuesta de condiciones de vida 2017.  
17 2018.<https://www.idescat.cat/novetats/?id=2991&lang=es>  
18  
19  
20 15 Owen R, Macnaghten P, Stilgoe J. Responsible research and innovation: From science in  
21 society to science for society, with society. *Sci Public Policy* 2012;39:751–60.  
22 doi:10.1093/scipol/scs093  
23  
24  
25 16 Ussher JM. *The Madness of Women*. New York: : Routledge 2011.  
26  
27  
28 17 Butler J. *Gender Trouble*. New York: : Routledge 2007.  
29  
30  
31 18 Kastoryano R. Multiculturalism and interculturalism: redefining nationhood and  
32 solidarity. *Comp Migr Stud* 2018;6. doi:10.1186/s40878-018-0082-6  
33  
34  
35 19 Fleckman JM, Dal Corso M, Ramirez S, *et al*. Intercultural Competency in Public  
36 Health: A Call for Action to Incorporate Training into Public Health Education. *Front*  
37 *public Heal* 2015;3:210. doi:10.3389/fpubh.2015.00210  
38  
39  
40 20 Zapata-Barrero R. Interculturalism in the post-multicultural debate: a defence. *Comp*  
41 *Migr Stud* 2017;5:14. doi:10.1186/s40878-017-0057-z  
42  
43  
44 21 Domínguez-Berjón, M. F. Borrell C, Cano-Serral G, Esnaola S, *et al*. Construcción de un  
45 índice de privación a partir de datos censales en grandes ciudades españolas (Proyecto  
46 MEDEA). *Gac Sanit* 2008;22:179–87.  
47  
48  
49 22 Minkler M, Wallerstein N. *Community based participatory research for health: Process*  
50 *to outcomes*. 2nd ed. San Francisco: : Jossey Bass 2008.  
51  
52  
53 23 Berenguera A, Fernández de Sanmamed MJ, Pons M, *et al*. *To Listen, To Observe and*  
54 *To Understand. Bringing Back Narrative into the Health Sciences. Contributions of*  
55 *Qualitative Research*. Barcelona: : Institut Universitari d’Investigació en Atenció  
56 Primària Jordi Gol (IDIAPJGol) 2017.  
57  
58  
59  
60

- 1  
2  
3 24 Boynton PM, Greenhalgh T. Hands-on guide to questionnaire research: Selecting,  
4 designing, and developing your questionnaire. *Br Med J* 2004;**328**:1312–5.  
5  
6 doi:10.1136/bmj.328.7451.1312  
7

## 8 **AUTHORS' CONTRIBUTIONS**

9  
10  
11 LMP has led and coordinated the conception and design of this study. She has written this  
12 manuscript. AB has been involved in the conception and design in this study. She has reviewed  
13 and made substantial contributions to this manuscript. TLJ has contributed to the design of the  
14 quantitative study, performed power calculations and written the plan for the quantitative data  
15 analyses. He has reviewed and made substantial contributions to this manuscript. CJA, CVL,  
16 RTV, DP, LH, PBC, ESL and JMF have contributed to the design of this study. She has reviewed  
17 and made substantial contributions to this manuscript.  
18  
19  
20  
21

## 22 **FUNDING STATEMENT**

23  
24  
25 This work was supported by The European Society of Contraception and Reproductive Health,  
26 project number P-2019-A-01.  
27  
28

## 29 **COMPETING INTEREST STATEMENT**

30  
31  
32 The authors declare no conflict of interest.  
33

## 34 **ACKNOWLEDGEMENTS**

35  
36 We would like to thank all women (and men) from the community who contributed to the ideas  
37 captured in this protocol. We would like to specially thank Carmen Revuelta Lisa, Ramona Ortiz  
38 López and Mònica Isido Albaladejo for their contributions to elaborating the materials and  
39 setting up recruitment and data collection. Also, we want to acknowledge Patryk  
40 Bialoskorski for his contributions revising the language in this article.  
41  
42  
43  
44  
45  
46  
47

## 48 **FIGURE LEGEND**

49  
50 Figure 1. Gantt Chart.  
51  
52  
53  
54  
55  
56  
57  
58  
59  
60

FIGURE

| STUDY PHASES                    | TASKS                                                              | TEAM                        | Year 1 |   |   |   |   |   |   |   |   |    |    |    | Year 2 |   |   |   |   |   |   |   |   |    |    |    |
|---------------------------------|--------------------------------------------------------------------|-----------------------------|--------|---|---|---|---|---|---|---|---|----|----|----|--------|---|---|---|---|---|---|---|---|----|----|----|
|                                 |                                                                    |                             | Months |   |   |   |   |   |   |   |   |    |    |    | Months |   |   |   |   |   |   |   |   |    |    |    |
|                                 |                                                                    |                             | 1      | 2 | 3 | 4 | 5 | 6 | 7 | 8 | 9 | 10 | 11 | 12 | 1      | 2 | 3 | 4 | 5 | 6 | 7 | 8 | 9 | 10 | 11 | 12 |
| Transversal                     | Meetings research group                                            | Research team               | ■      | ■ | ■ | ■ | ■ | ■ | ■ | ■ | ■ | ■  | ■  | ■  | ■      | ■ | ■ | ■ | ■ | ■ | ■ | ■ | ■ | ■  |    |    |
|                                 | Meetings working group                                             | Working group               |        |   |   |   |   |   |   |   |   |    |    |    |        |   |   |   |   |   |   |   |   |    |    |    |
| Study preparation               | Ethical approvals                                                  | Research team               | ■      |   |   |   |   |   |   |   |   |    |    |    |        |   |   |   |   |   |   |   |   |    |    |    |
|                                 | Creation of working group                                          | Research team               | ■      |   |   |   |   |   |   |   |   |    |    |    |        |   |   |   |   |   |   |   |   |    |    |    |
|                                 | Development of study protocol                                      | Working group               | ■      |   |   |   |   |   |   |   |   |    |    |    |        |   |   |   |   |   |   |   |   |    |    |    |
|                                 | Development of study materials                                     | Working group               | ■      | ■ |   |   |   |   |   |   |   |    |    |    |        |   |   |   |   |   |   |   |   |    |    |    |
|                                 | Establish contacts for recruitment                                 | Working group               |        | ■ | ■ | ■ |   |   |   |   |   |    |    |    |        |   |   |   |   |   |   |   |   |    |    |    |
| Recruitment and data collection | Recruitment schools                                                | Working group               |        |   |   |   | ■ |   |   |   |   |    |    |    |        |   |   |   |   |   |   |   |   |    |    |    |
|                                 | Recruitment participants                                           | Research team               |        |   |   |   | ■ |   |   |   |   |    |    |    |        |   |   |   |   |   |   |   |   |    |    |    |
|                                 | Completion of questionnaires                                       | Research team               |        |   |   |   | ■ | ■ |   |   |   |    |    |    |        |   |   |   |   |   |   |   |   |    |    |    |
|                                 | Individual interviews                                              | Research team               |        |   |   |   |   | ■ | ■ |   |   |    |    |    |        |   |   |   |   |   |   |   |   |    |    |    |
|                                 | Group discussions                                                  | Research team               |        |   |   |   |   |   |   | ■ | ■ |    |    |    |        |   |   |   |   |   |   |   |   |    |    |    |
|                                 | World Café                                                         | Research team               |        |   |   |   |   |   |   |   |   | ■  |    |    |        |   |   |   |   |   |   |   |   |    |    |    |
| Data analyses                   | Transcribing                                                       | Research team; transcriber  |        |   |   |   |   | ■ | ■ | ■ | ■ | ■  |    |    |        |   |   |   |   |   |   |   |   |    |    |    |
|                                 | Quantitative analyses                                              | Research team               |        |   |   |   |   | ■ | ■ | ■ | ■ | ■  |    |    |        |   |   |   |   |   |   |   |   |    |    |    |
|                                 | Qualitative analyses                                               | Research team               |        |   |   |   |   |   |   |   |   |    | ■  | ■  | ■      |   |   |   |   |   |   |   |   |    |    |    |
|                                 | Discussion of results                                              | Working group               |        |   |   |   |   |   | ■ | ■ | ■ | ■  | ■  | ■  | ■      |   |   |   |   |   |   |   |   |    |    |    |
| Dissemination                   | Dissemination project                                              | Participants; working group |        |   |   |   |   |   |   |   |   |    |    |    |        |   | ■ | ■ | ■ | ■ | ■ | ■ | ■ | ■  |    |    |
|                                 | Dissemination of final product                                     | Participants; working group |        |   |   |   |   |   |   |   |   |    |    |    |        |   |   |   |   |   | ■ | ■ | ■ | ■  |    |    |
|                                 | Dissemination of results                                           | Working group               | ■      | ■ | ■ | ■ | ■ | ■ | ■ | ■ | ■ | ■  | ■  | ■  | ■      | ■ | ■ | ■ | ■ | ■ | ■ | ■ | ■ | ■  |    |    |
|                                 | Publication 1 (study protocol)                                     | Working group               | ■      | ■ | ■ | ■ | ■ | ■ | ■ | ■ | ■ | ■  | ■  | ■  | ■      | ■ | ■ | ■ | ■ | ■ | ■ | ■ | ■ | ■  |    |    |
|                                 | Publication 2 (quantitative data)                                  | Working group               |        |   |   |   |   |   |   |   | ■ | ■  | ■  | ■  | ■      |   |   |   |   |   |   |   |   |    |    |    |
|                                 | Publication 3 (qualitative data; interviews and group discussions) | Working group               |        |   |   |   |   |   |   |   |   |    |    |    |        |   | ■ | ■ | ■ | ■ | ■ | ■ | ■ | ■  |    |    |
|                                 | Publication 4 (qualitative data; world café)                       | Working group               |        |   |   |   |   |   |   |   |   |    |    |    |        |   |   |   |   |   | ■ | ■ | ■ | ■  |    |    |
| Evaluation and impact           | Impact evaluation                                                  | Working group               |        |   |   |   |   |   | ■ |   |   |    |    |    |        |   |   |   |   |   |   | ■ | ■ |    |    |    |

Figure 1. Gantt Chart

## MENSTRUAL HEALTH QUESTIONNAIRE

**You will need to complete all questions if you have menstruated already. Please complete questions 1 to 16 if you have not had the menstruation yet.**

Your answers are anonymous so nobody will be able to know that you have completed this questionnaire. It is very important for you to know that there are no right or wrong answers, all answers are welcome!

Date: \_\_\_\_\_

**Indicate with an X or write your answer to the following questions**

1. How old are you? \_\_\_\_\_
2. What city do you live in? \_\_\_\_\_
3. What is the name of your school? \_\_\_\_\_
4. What are you studying? \_\_\_\_\_
5. What country were you born in? \_\_\_\_\_
6. What countries were your carers (e.g. parents/tutors) born in?
  - My carer (e.g. parent/tutor) 1 was born in \_\_\_\_\_
  - My carer (e.g. parent/tutor) 2 was born in \_\_\_\_\_
  - I don't know
8. Do you feel part of any of these communities? *Tick all options that are true for you*

|                                                                                                                                           |                                                                                                                                                        |
|-------------------------------------------------------------------------------------------------------------------------------------------|--------------------------------------------------------------------------------------------------------------------------------------------------------|
| <ul style="list-style-type: none"> <li>○ Gipsy</li> <li>○ Christian</li> <li>○ Catholic</li> <li>○ Islamic</li> <li>○ Hinduist</li> </ul> | <ul style="list-style-type: none"> <li>○ Buddhist</li> <li>○ Jewish</li> <li>○ Other _____</li> <li>○ None of these</li> <li>○ I don't know</li> </ul> |
|-------------------------------------------------------------------------------------------------------------------------------------------|--------------------------------------------------------------------------------------------------------------------------------------------------------|
9. Have you ever menstruated before?
  - Yes
  - No
  - I don't know

- 1  
2  
3  
4  
5  
6  
7  
8  
9  
10  
11  
12  
13  
14  
15  
16  
17  
18  
19  
20  
21  
22  
23  
24  
25  
26  
27  
28  
29  
30  
31  
32  
33  
34  
35  
36  
37  
38  
39  
40  
41  
42  
43  
44  
45  
46  
47  
48  
49  
50  
51  
52  
53  
54  
55  
56  
57  
58  
59  
60
10. Do you think menstrual pain is “normal”?
- Yes, it always hurts
  - Yes, it hurts sometimes
  - No, it shouldn't hurt too much
  - No, it doesn't hurt
  - I don't know
11. Where have you learnt about menstruation? Tick all options that are true for you
- Family
  - School
  - Friends
  - Internet
  - Social networks (e.g. Instagram)
  - TV
  - Magazines or books
  - Other \_\_\_\_\_
  - I don't know
12. Would you like to have more information on menstruation? Tick all options that are true for you
- Yes, on what the menstruation is
  - Yes, on menstruation duration
  - Yes, on how menstruation can have an impact on my daily life
  - Yes, on menstruation delays
  - Yes, on menstrual products
  - Yes, on something else: \_\_\_\_\_
  - No, I have enough
  - No, I am not interested
  - I don't know
13. Are you embarrassed to talk about menstruation?
- Yes
  - No
  - I don't know
14. What is menstruation? Tick all the options that you think are correct.
- Blood that comes out of the vagina
  - People menstruate every 3 weeks
  - It is common to menstruate over 10 days or more
  - Women menstruate all their lives
  - It is related to the menstrual cycle
  - I don't know
15. What menstrual products have you heard of (even if you have not used them)?

- 1  
2  
3  
4  
5  
6  
7  
8  
9  
10  
11  
12  
13  
14  
15  
16
- Tampons
  - Single-use pads
  - Cloth menstrual pads (washable and re-usable)
  - Menstrual cup
  - Menstrual underwear (menstrual-proof underwear, washable and reusable)
  - Menstrual sponges
  - Other: \_\_\_\_\_
  - I don't know

17  
18  
19  
20  
21  
22  
23  
24  
25  
26  
27

16. What is the menstrual cycle? *Tick all the options that you think are correct.*

- It has 3 phases
- It has something to do with hormones
- There are no changes in the body during the menstrual cycle
- It has something to do with ovulation
- I don't know

28  
29  
30  
31  
32  
33  
34  
35  
36  
37  
38  
39  
40  
41  
42  
43  
44  
45  
46  
47  
48  
49  
50  
51  
52  
53  
54  
55  
56  
57  
58  
59  
60

**IF YOU HAVE NOT MENSTRUATED ALREADY, YOU HAVE FINISHED!**

**Thank you very much for participating!**

**PLEASE, CONTINUE ANSWERING IF YOU HAVE MENSTRUATED BEFORE** 

17. How old were you when you menstruated for the first time? \_\_\_\_\_

18. Do you get menstrual pain?

- Yes, always
- Yes, sometimes
- Very few times
- No, never
- I don't know

19. What do you do when you have menstrual pain? *Tick all the things that you do.*

- I take painkillers (e.g. Ibuprofen, paracetamol...)
- I take hormonal contraceptives every day for menstrual pain
- I use natural remedies
- I cannot buy products for menstrual pain
- I don't do anything
- I do something else: \_\_\_\_\_
- I don't get menstrual pain
- I don't know

- 1  
2  
3  
4  
5  
6  
7  
8  
9  
10  
11  
12  
13  
14  
15  
16  
17  
18  
19  
20  
21  
22  
23  
24  
25  
26  
27  
28  
29  
30  
31  
32  
33  
34  
35  
36  
37  
38  
39  
40  
41  
42  
43  
44  
45  
46  
47  
48  
49  
50  
51  
52  
53  
54  
55  
56  
57  
58  
59  
60
20. Have you every spoken with someone about menstrual pain?
- Yes, with \_\_\_\_\_ (e.g., my mother)
  - No
  - I don't know
21. Do you stop going to school when you menstruate?
- Yes, always
  - Very few times
  - I don't know
  - Yes, sometimes
  - No, never
22. Do you stop exercising or going to physical education when you menstruate?
- Yes, always
  - Very few times
  - I don't know
  - Yes, sometimes
  - No, never
23. Do you stop doing activities such as going to the pool or to the beach when you menstruate?
- Yes, always
  - Very few times
  - I don't know
  - Yes, sometimes
  - No, never
24. Do you miss any plans with your friends when you menstruate?
- Yes, always
  - Very few times
  - I don't know
  - Yes, sometimes
  - No, never
25. Do you have trouble concentrating at school when you menstruate?
- Yes, always
  - Very few times
  - I don't know
  - Yes, sometimes
  - No, never
23. Do you feel less capable of taking an exam or evaluated activity when you menstruate?
- Yes, always
  - Very few times
  - I don't know
  - Yes, sometimes
  - No, never
24. Did you have information on menstruation before menstruating for the first time?
- Yes
  - No
  - I don't know
25. Did you feel ready to menstruate when you menstruated for the first time?
- Yes
  - No
  - I don't know
26. How do you usually feel when you have menstruate? *Tick all options that are true for you.*
- Happy
  - Embarrassed
  - Other: \_\_\_\_\_
  - Sad
  - Relaxed
  - Dirty
  - Tired
  - I don't know
  - Angry
  - Sensitive

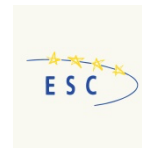

- 1  
2  
3  
4  
5  
6  
7  
8  
9  
10  
11  
12  
13  
14  
15  
16  
17  
18  
19  
20  
21  
22  
23  
24  
25  
26  
27  
28  
29  
30  
31  
32  
33  
34  
35  
36  
37  
38  
39  
40  
41  
42  
43  
44  
45  
46  
47  
48  
49  
50  
51  
52  
53  
54  
55  
56  
57  
58  
59  
60
27. Are you scared of staining your clothes with blood when you menstruate?
- Yes
  - No
  - I don't know
28. How often have you made up an excuse not to say that you were menstruating?
- Always
  - Very few times
  - I don't know
  - Sometimes
  - Never
29. Has anyone ever made fun of you for menstruating?
- Yes
  - No
  - I don't know
30. Have you ever seen anyone making fun of someone else for menstruating?
- Yes
  - No
  - I don't know
31. Are you embarrassed of buying (or asking for) menstrual products?
- Yes, always
  - No, never
  - Yes, sometimes
  - I don't know
  - Very few times
  - Someone else buys them for me
32. What menstrual products do you use? Tick all the products that you use.
- Tampons
  - I wear more than one piece of
  - Single-use pads
  - underwear
  - Cloth menstrual pads
  - Nappies
  - Menstrual cup
  - I don't use anything (free bleeding)
  - Toilet paper
  - Other: \_\_\_\_\_
  - Menstrual underwear
  - I don't know
  - Menstrual sponge
33. Do you think menstrual products are expensive?
- Yes
  - No
  - I don't know
34. Have you ever lacked any money to buy menstrual products?
- Yes, always
  - Very few times
  - I don't know
  - Yes, sometimes
  - No, never





- 1  
2  
3  
4  
5  
6  
7  
8  
9  
10  
11  
12  
13  
14  
15  
16  
17  
18  
19  
20  
21  
22  
23  
24  
25  
26  
27  
28  
29  
30  
31  
32  
33  
34  
35  
36  
37  
38  
39  
40  
41  
42  
43  
44  
45  
46  
47  
48  
49  
50  
51  
52  
53  
54  
55  
56  
57  
58  
59  
60
35. Have you ever had to use menstrual products that you don't like because the ones you like are too expensive?
- Yes, always                       Very few times                       I don't know
- Yes, sometimes                       No, never
36. Can you get menstrual products for free in your school?
- Yes
- No
- I don't know
37. Do you feel comfortable asking for menstrual products in the following places? *Tick all options that are true for you.*
- School                                               Sports club
- Youth centre                                               No, I don't feel comfortable
38. Have you ever asked about menstruation in your health centre or pharmacy?
- Yes
- No, but I would like to
- No, but I would not like to
- I don't know
39. Have you ever used menstrual products for longer than it is recommended because you did not have a replacement?
- Yes, always                       Very few times                       I don't know
- Yes, sometimes                       No, never
40. Have you ever used menstrual products for longer than it is recommended because you could not find appropriate washing facilities (e.g., individual bathroom, soap to wash your hands, clean bathroom,...)?
- Yes, always                       Very few times                       I don't know
- Yes, sometimes                       No, never
41. Have you had any of these symptoms in the last 6 months?
- Genital rash                                               I haven't had any of these symptoms
- Vaginal irritation                                               Other symptoms:
- Genital redness or inflammation                                              \_\_\_\_\_
- Unusual vaginal discharge (colour/odour)                                               I don't know

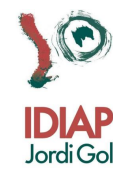

1  
2  
3 42. If you have had symptoms, have you spoken about it with anyone?  
4

- 5     ○ Yes, with \_\_\_\_\_  
6     ○ No  
7     ○ I don't know  
8     ○ I haven't had any symptoms  
9  
10

11 43. If you have had symptoms, have you received any treatment?  
12

- 13     ○ Yes, at \_\_\_\_\_ (e.g., health centre)  
14     ○ No  
15     ○ I don't know  
16     ○ I haven't had any symptoms  
17  
18  
19

20  
21  
22                   **Would you like to add anything?**

23                   **Let us know here:**

24 \_\_\_\_\_  
25 \_\_\_\_\_  
26 \_\_\_\_\_  
27 \_\_\_\_\_  
28 \_\_\_\_\_  
29 \_\_\_\_\_  
30 \_\_\_\_\_  
31 \_\_\_\_\_  
32

33                   **THANK YOU VERY MUCH FOR YOUR PARTICIPATION!**  
34  
35  
36  
37  
38  
39  
40  
41  
42  
43  
44  
45  
46  
47  
48  
49  
50  
51  
52  
53  
54  
55  
56  
57  
58  
59  
60
